# Supplementary material
Source: PubMed Central journal article supplement (PMC9526829)
Supplement: nmac042_supplemental_file.pdf [file nmac042_supplemental_file.pdf]

An empirical evaluation of the impact scenario of pooling bodies of evidence from randomized controlled trials and cohort studies in nutrition research.

Schwingshackl Lukas et al.

"Online Supplementary Material"

Supplemental data

Supplementary Appendices A: Search strategy for systematic reviews of RCTs in the Cochrane Database of Systematic Reviews

| ID  | Search                                                                                                                                                                                                                                                                                                                                         | Hits       |
|-----|------------------------------------------------------------------------------------------------------------------------------------------------------------------------------------------------------------------------------------------------------------------------------------------------------------------------------------------------|------------|
| #1  | MeSH descriptor: [Diet, Carbohydrate-Restricted] explode all trees                                                                                                                                                                                                                                                                             | 385        |
| #2  | MeSH descriptor: [Healthy Diet] explode all trees                                                                                                                                                                                                                                                                                              | 336        |
| #3  | MeSH descriptor: [Diet, Mediterranean] this term only                                                                                                                                                                                                                                                                                          | 434        |
| #4  | MeSH descriptor: [Dietary Approaches To Stop Hypertension] explode all trees                                                                                                                                                                                                                                                                   | 15         |
| #5  | MeSH descriptor: [Micronutrients] explode all trees                                                                                                                                                                                                                                                                                            | 4,992      |
| #6  | MeSH descriptor: [Dietary Supplements] explode all trees                                                                                                                                                                                                                                                                                       | 11,620     |
| #7  | (mediterranean or dash diet or low-carb* or low-fat* or grain* or vegetable* or fruit* or milk or dairy or meat or processed meat* or fish or eggs or nuts or chocolate or oil*):ti,ab,kw                                                                                                                                                      | 40,401     |
| #8  | (carbohydrate* or fructose or glucose or starch or sucrose or fibre or psyllium or inulin or cellulose or prebiotic* or probiotic* or synbiotic* or n-3 or omega 3 or omega-3 or n3 or n6 or n-6 or omega 6 or omega-6 or unsaturated or monounsaturated or polyunsaturated or EPA or DHA or linoleic acid or protein or amino acid*):ti,ab,kw | 167,040    |
| #9  | (vitamin* or beta-carot* or ascorbic acid or cholecalciferol* or ergocalciferol or thiamine or riboflavin or niacin or pyridoxine or cobalamin or folic acid or magnesium or calcium or selenium or sodium or potassium or iron or zinc or copper or iodine):ti,ab,kw                                                                          | 118,402    |
| #10 | #1 or #2 or #3 or #4 or #5 or #6 or #7 or #8 or #9                                                                                                                                                                                                                                                                                             | 283,530    |
| #11 | (diet* or nutrition or eat* or consum* or intake):ti,ab,kw                                                                                                                                                                                                                                                                                     | 163,651    |
| #12 | #10 and #11                                                                                                                                                                                                                                                                                                                                    | 83,677     |
| #13 | (mortal* or cancer or diabetes or dementia or macular degeneration or body weight or blood pressure or glucose or cholester*):ti,ab,kw                                                                                                                                                                                                         | 448,002    |
| #14 | #12 and #13                                                                                                                                                                                                                                                                                                                                    | 48,529     |
| #15 | Cochrane Reviews published between "2010 - 2019"                                                                                                                                                                                                                                                                                               | <b>333</b> |

## Supplemental data

## Supplementary Appendices B: Search strategy for systematic reviews of cohort studies in Ovid MEDLINE

| ID  | Search                                                                                                                                                                                                                                                                                                                                       | Hits         |
|-----|----------------------------------------------------------------------------------------------------------------------------------------------------------------------------------------------------------------------------------------------------------------------------------------------------------------------------------------------|--------------|
| #1  | (non-randomised or non-randomized or nrs or observational* or cohort or prospective or longitudinal* or follow* or case-cohort or nested case-control or epidemio*).ti,ab,kf.                                                                                                                                                                | 4,466,200    |
| #2  | (meta-analys* or metaanalys* or "systematic review" or systematic-review).ti,ab.                                                                                                                                                                                                                                                             | 238,477      |
| #3  | (Systematic Review or Meta-Analysis).pt.                                                                                                                                                                                                                                                                                                     | 177,170      |
| #4  | #1 and (#2 or #3)                                                                                                                                                                                                                                                                                                                            | 104,427      |
| #5  | Diet, Mediterranean/ or Diet, Carbohydrate-Restricted/ or Healthy Diet/ or Dietary Approach to Stop Hypertension/ or Micronutrients/ or Dietary Supplements/                                                                                                                                                                                 | 65,391       |
| #6  | (mediterranean or dash diet or low-carb* or low-fat* or grain* or vegetable* or fruit* or milk or dairy or meat or processed meat* or fish or eggs or nuts or chocolate or oil*).ti,ab.                                                                                                                                                      | 733,079      |
| #7  | (carbohydrate* or fructose or glucose or starch or sucrose or fibre or psyllium or inulin or cellulose or prebiotic* or probiotic* or synbiotic* or n-3 or omega 3 or omega-3 or n3 or n6 or n-6 or omega 6 or omega-6 or unsaturated or monounsaturated or polyunsaturated or EPA or DHA or linoleic acid or protein or amino acid*).ti,ab. | 3,445,283    |
| #8  | (vitamin* or beta-carot* or ascorbic acid or cholecalciferol* or ergocalciferol or thiamine or riboflavin or niacin or pyridoxine or cobalamin or folic acid or magnesium or calcium or selenium or sodium or potassium or iron or zinc or copper or iodine).ti,ab.                                                                          | 1,391,454    |
| #9  | (diet* or nutrition or eat* or consum* or intake).ti,ab.                                                                                                                                                                                                                                                                                     | 1,173,600    |
| #10 | (#5 or #6 or #7 or #8) and #9                                                                                                                                                                                                                                                                                                                | 502,160      |
| #11 | #4 and #10                                                                                                                                                                                                                                                                                                                                   | 3,809        |
| #12 | limit #11 to yr="2010 - 2019"                                                                                                                                                                                                                                                                                                                | <b>3,118</b> |

Supplemental data

Supplementary Table 1: Explanation and definition for Population (P), Intervention/Exposure (I/E), Comparator (C), Outcome (O) similarities.

|                               | Patients/population                                                                                                       | Intervention/Exposure                                                                                                                                                                                                                                                                                                                                                                                                                                                                                                                                                                                                                                                           | Comparator                                                              | Outcome                                                                                                                                                  |
|-------------------------------|---------------------------------------------------------------------------------------------------------------------------|---------------------------------------------------------------------------------------------------------------------------------------------------------------------------------------------------------------------------------------------------------------------------------------------------------------------------------------------------------------------------------------------------------------------------------------------------------------------------------------------------------------------------------------------------------------------------------------------------------------------------------------------------------------------------------|-------------------------------------------------------------------------|----------------------------------------------------------------------------------------------------------------------------------------------------------|
| 1 = more or less identical    | Both bodies of evidence include primary or secondary prevention.                                                          | Both bodies of evidence use intake, supplements or status.                                                                                                                                                                                                                                                                                                                                                                                                                                                                                                                                                                                                                      | Both bodies of evidence use (no) intake, supplements/placebo or status. | Same outcome.                                                                                                                                            |
|                               | e.g. people with cardiovascular disease in BoE from RCTs and CSs.                                                         | e.g. Folate supplements in BoE from RCTs and BoE from CSs.                                                                                                                                                                                                                                                                                                                                                                                                                                                                                                                                                                                                                      | e.g. see Intervention/Exposure.                                         | e.g. Cardiovascular disease in BoE from RCTs and BoE from CSs.                                                                                           |
| 2 = similar but not identical | Both bodies of evidence include primary and secondary prevention or mixed population vs. primary or secondary prevention. | <ul style="list-style-type: none"> <li>- Intake vs. supplements.</li> <li>- Enriched / modified foods vs. intake.</li> <li>- Intake vs. urinary excretion.</li> <li>- Intake + supplements vs. intake.</li> <li>- Intake vs. intake on similar but not identical intervention /exposure</li> <li>- Supplements vs. supplements on similar but not identical intervention /exposure</li> </ul>                                                                                                                                                                                                                                                                                   | see Intervention/Exposure.                                              | Same cluster of outcomes.                                                                                                                                |
|                               | e.g. healthy people and people with cardiovascular disease in RCTs vs. general healthy population in CSs.                 | <ul style="list-style-type: none"> <li>e.g.</li> <li>- Vitamin C supplements vs. Vitamin C intake.</li> <li>- Margarine enriched with <math>\alpha</math>-Linolenic acid vs. <math>\alpha</math>-Linolenic acid intake.</li> <li>- Substituted salt intake (with 65% sodium) vs. sodium intake.</li> <li>- Sodium intake vs. sodium intake and urinary sodium.</li> <li>- Fruit and vegetables intake vs. fruit or vegetables intake.</li> <li>- Low-fat intake vs. High-carbohydrate intake.</li> <li>- Increased fruit and vegetable intake + decreased fat intake vs. flavonoids intake.</li> <li>- Multi-micronutrient supplements vs. Multivitamin supplements.</li> </ul> | e.g. see Intervention/Exposure.                                         | <ul style="list-style-type: none"> <li>e.g.</li> <li>- Cardiovascular disease vs. coronary heart disease.</li> <li>- Mortality vs. incidence.</li> </ul> |
| 3 = broadly similar           | Secondary (BoE from RCTs) vs. primary prevention (BoE from CSs), which means no healthy population in the BoE from RCTs.  | <ul style="list-style-type: none"> <li>- Intake or supplements vs. status.</li> <li>- Supplements vs. intake on broadly similar intervention/exposure.</li> </ul>                                                                                                                                                                                                                                                                                                                                                                                                                                                                                                               | see Intervention/Exposure.                                              | Broadly similar outcomes. Continuous vs. dichotomous outcome (see also supplementary table 4).                                                           |
|                               | e.g. people with                                                                                                          | e.g.                                                                                                                                                                                                                                                                                                                                                                                                                                                                                                                                                                                                                                                                            | e.g. see Intervention/Exposure.                                         | e.g. Colorectal adenoma vs.                                                                                                                              |

### Supplemental data

|  |                                                                       |                                                                                                       |  |                    |
|--|-----------------------------------------------------------------------|-------------------------------------------------------------------------------------------------------|--|--------------------|
|  | cardiovascular disease in RCTs vs. general healthy population in CSs. | - Vitamin D supplements vs. Vitamin D status.<br>- Vitamin A supplements vs. $\beta$ -carotene intake |  | colorectal cancer. |
|--|-----------------------------------------------------------------------|-------------------------------------------------------------------------------------------------------|--|--------------------|

BoE: bodies of evidence; CS: cohort study; RCT: randomized controlled trial.

Supplemental data

Supplementary Table 2: Population (P), Intervention/Exposure (I/E), Comparator (C), Outcome (O) matching similarities for all identified diet-disease associations.

| Bodies of evidence from randomized controlled trials (Cochrane Reviews) |                                                                |                                     | Bodies of evidence from cohort studies |                                      |                                     | PI/ECO similarities   |                         |            |         |         | Included in the pooling scenario (Yes/ No) |
|-------------------------------------------------------------------------|----------------------------------------------------------------|-------------------------------------|----------------------------------------|--------------------------------------|-------------------------------------|-----------------------|-------------------------|------------|---------|---------|--------------------------------------------|
| Author, year (Supplementary Reference)                                  | Intervention (as defined by the authors)                       | Outcome (as defined by the authors) | Author, year (Supplementary Reference) | Exposure (as defined by the authors) | Outcome (as defined by the authors) | Patients / population | Intervention / Exposure | Comparator | Outcome | Overall |                                            |
| Abdelhamid et al. 2018a (1)                                             | Omega-3 fatty acids intake + supplements                       | Cardiovascular mortality            | Chowdhury et al. 2014a (2)             | Omega-3 fatty acids intake           | Coronary heart disease mortality    | 3                     | 2                       | 2          | 2       | 3       | N                                          |
| Abdelhamid et al. 2018a (1)                                             | Omega-3 fatty acids intake + supplements                       | Cardiovascular disease              | Chowdhury et al. 2014a (2)             | Omega-3 fatty acids intake           | Coronary heart disease              | 2                     | 2                       | 2          | 2       | 2       | Y                                          |
| Abdelhamid et al. 2018a (1)                                             | $\alpha$ -Linolenic acid intake (Supplementary/enriched foods) | Cardiovascular disease              | Pan et al. 2012 (3)                    | $\alpha$ -Linolenic acid intake      | Cardiovascular disease              | 2                     | 2                       | 2          | 1       | 2       | Y                                          |
| Abdelhamid et al. 2018a (1)                                             | Omega-3 fatty acids intake + supplements                       | Body weight                         | Schlesinger et al. 2019 (4)            | Fish intake                          | Weight gain                         | 3                     | 2                       | 2          | 1       | 3       | N                                          |
| Abdelhamid et al. 2018a (1)                                             | Omega-3 fatty acids intake + supplements                       | All-cause mortality                 | Wan et al. 2017 (5)                    | Omega-3 fatty acids intake           | All-cause mortality                 | 2                     | 2                       | 2          | 1       | 2       | Y                                          |
| Abdelhamid et al. 2018a (1)                                             | $\alpha$ -Linolenic acid intake (Supplementary/enriched foods) | Cardiovascular mortality            | Wei et al. 2018 (6)                    | $\alpha$ -Linolenic acid intake      | Coronary heart disease mortality    | 2                     | 2                       | 2          | 2       | 2       | Y                                          |
| Abdelhamid et al. 2018a (1)                                             | $\alpha$ -Linolenic acid intake (Supplementary/enriched foods) | Coronary heart disease              | Wei et al. 2018 (6)                    | $\alpha$ -Linolenic acid intake      | Coronary heart disease              | 2                     | 2                       | 2          | 1       | 2       | Y                                          |
| Abdelhamid et al. 2018b (7)                                             | Polyunsaturated fat intake + supplements                       | All-cause mortality                 | Li et al. 2020 (8)                     | Omega-3 fatty acids intake           | All-cause mortality                 | 2                     | 2                       | 2          | 1       | 2       | Y                                          |
| Abdelhamid et al. 2018b(7)                                              | Polyunsaturated fat intake + supplements                       | Coronary heart disease              | Chowdhury et al. 2014a (2)             | Omega-6 fatty acids intake           | Coronary heart disease              | 2                     | 2                       | 2          | 1       | 2       | Y                                          |
| Abdelhamid et al. 2018b(7)                                              | Polyunsaturated fat intake                                     | Major cardiovascular events         | Zhu et al. 2019 (9)                    | Polyunsaturated fat intake           | Cardiovascular disease              | 2                     | 1                       | 1          | 1       | 2       | Y                                          |
| Adler et al. 2014 (10)                                                  | Low sodium intake                                              | All-cause mortality                 | Aburto et al. 2013 (11)                | Low sodium intake                    | All-cause mortality                 | 2                     | 2                       | 2          | 1       | 2       | Y                                          |
| Adler et al. 2014 (10)                                                  | Low sodium intake                                              | Cardiovascular mortality            | Aburto et al. 2013 (11)                | Low sodium intake                    | Cardiovascular mortality            | 2                     | 2                       | 2          | 1       | 2       | Y                                          |
| Adler et al. 2014 (10)                                                  | Low sodium intake                                              | Cardiovascular disease              | Aburto et al. 2013 (11)                | Low sodium intake                    | Cardiovascular disease              | 2                     | 2                       | 2          | 1       | 2       | Y                                          |

## Supplemental data

|                              |                               |                                     |                                |                              |                          |   |   |   |   |   |   |
|------------------------------|-------------------------------|-------------------------------------|--------------------------------|------------------------------|--------------------------|---|---|---|---|---|---|
| Adler et al. 2014 (10)       | Low sodium intake             | Systolic blood pressure             | Leyvraz et al. 2018 (12)       | Low sodium intake + status   | Systolic blood pressure  | 3 | 2 | 2 | 1 | 3 | Y |
| Adler et al. 2014 (10)       | Low sodium intake             | Diastolic blood pressure            | Leyvraz et al. 2018 (12)       | Low sodium intake + status   | Diastolic blood pressure | 3 | 2 | 2 | 1 | 3 | Y |
| Al-Khudairy et al. 2017 (13) | Vitamin C supplements         | Major cardiovascular events         | Aune et al. 2018 (14)          | Vitamin C intake             | Cardiovascular disease   | 2 | 2 | 2 | 1 | 2 | Y |
| Al-Khudairy et al. 2017 (13) | Vitamin C supplements         | Cardiovascular mortality            | Aune et al. 2018 (14)          | Vitamin C intake             | Cardiovascular mortality | 2 | 2 | 2 | 1 | 2 | N |
| Al-Khudairy et al. 2017 (13) | Vitamin C supplements         | All-cause mortality                 | Aune et al. 2018 (14)          | Vitamin C intake             | All-cause mortality      | 2 | 2 | 2 | 1 | 2 | Y |
| Avenell et al. 2014 (15)     | Vitamin D supplements         | Hip fracture                        | Feng et al. 2017 (16)          | Vitamin D status             | Hip fracture             | 2 | 3 | 3 | 1 | 3 | Y |
| Avenell et al. 2014 (15)     | Vitamin D supplements         | Any fracture                        | Feng et al. 2017 (16)          | Vitamin D status             | Any fracture             | 2 | 3 | 3 | 1 | 3 | Y |
| Bjelakovic et al. 2012 (17)  | $\beta$ -carotene supplements | All-cause mortality                 | Aune et al. 2018 (14)          | $\beta$ -carotene intake     | All-cause mortality      | 2 | 2 | 2 | 1 | 2 | Y |
| Bjelakovic et al. 2012 (17)  | Vitamin E supplements         | All-cause mortality                 | Aune et al. 2018 (14)          | Vitamin E intake             | All-cause mortality      | 2 | 2 | 2 | 1 | 2 | Y |
| Bjelakovic et al. 2012 (17)  | Vitamin C supplements         | All-cause mortality                 | Aune et al. 2018 (14)          | Vitamin C intake             | All-cause mortality      | 2 | 2 | 2 | 1 | 2 | Y |
| Bjelakovic et al. 2012 (17)  | Vitamin A supplements         | All-cause mortality                 | Aune et al. 2018 (14)          | $\beta$ -carotene intake     | All-cause mortality      | 2 | 3 | 3 | 1 | 3 | Y |
| Bjelakovic et al. 2014a (18) | Vitamin D supplements         | All-cause mortality                 | Chowdhury et al. 2014b (19)    | Vitamin D status             | All-cause mortality      | 2 | 3 | 3 | 1 | 3 | Y |
| Bjelakovic et al. 2014a (18) | Vitamin D supplements         | Cardiovascular mortality            | Chowdhury et al. 2014b (19)    | Vitamin D status             | Cardiovascular mortality | 2 | 3 | 3 | 1 | 3 | Y |
| Bjelakovic et al. 2014a (18) | Vitamin D supplements         | Cancer mortality                    | Han et al. 2019 (20)           | Vitamin D status             | Cancer mortality         | 2 | 3 | 3 | 1 | 3 | Y |
| Bjelakovic et al. 2014b (21) | Vitamin D supplements         | Cancer occurrence                   | Han et al. 2019 (20)           | Vitamin D status             | Cancer incidence         | 2 | 3 | 3 | 1 | 3 | Y |
| Bjelakovic et al. 2014b (21) | Vitamin D3 supplements        | Breast cancer                       | Hossain et al. 2019 (22)       | Vitamin D supplements        | Breast cancer            | 2 | 1 | 1 | 1 | 2 | Y |
| Bjelakovic et al. 2014b (21) | Vitamin D3 supplements        | Lung cancer                         | Zhang et al. 2015 (23)         | Vitamin D intake             | Lung cancer              | 2 | 2 | 2 | 1 | 2 | Y |
| Cormick et al. 2015 (24)     | Calcium supplements           | Systolic blood pressure             | Jayedi et al. 2019 (25)        | Calcium intake + supplements | Hypertension             | 2 | 2 | 2 | 3 | 3 | N |
| Cormick et al. 2015 (24)     | Calcium supplements           | Diastolic blood pressure            | Jayedi et al. 2019 (25)        | Calcium intake + supplements | Hypertension             | 2 | 2 | 2 | 3 | 3 | N |
| De-Regil et al. 2015 (26)    | Folate supplements            | Neural tube defect                  | Blencowe et al. 2010 (27)      | Folate supplements           | Neural tube defect       | 2 | 1 | 1 | 1 | 2 | Y |
| De-Regil et al. 2015 (26)    | Folate supplements            | Congenital cardiovascular anomalies | Feng et al. 2015 (28)          | Folate supplements           | Congenital heart defect  | 1 | 1 | 1 | 2 | 2 | Y |
| El Dib et al. 2015 (29)      | Zinc supplements              | HOMA-IR                             | Fernandez-Cao et al. 2019 (30) | Zinc supplements             | Type 2 diabetes          | 2 | 1 | 1 | 3 | 3 | N |
| Hartley et al. 2013 (31)     | Fruit & Vegetables intake     | Systolic blood pressure             | Schwingshackl et al. 2017 (32) | Fruit intake                 | Hypertension             | 2 | 2 | 2 | 3 | 3 | N |

## Supplemental data

|                             |                                                    |                                |                                |                            |                          |   |   |   |   |   |   |
|-----------------------------|----------------------------------------------------|--------------------------------|--------------------------------|----------------------------|--------------------------|---|---|---|---|---|---|
| Hartley et al. 2013 (31)    | Fruit & Vegetables intake                          | Diastolic blood pressure       | Schwingshackl et al. 2017 (32) | Vegetables intake          | Hypertension             | 2 | 2 | 2 | 3 | 3 | N |
| Hartley et al. 2016 (33)    | Fibre intake + supplements                         | Systolic blood pressure        | Schwingshackl et al. 2017 (32) | Whole grain intake         | Hypertension             | 2 | 2 | 2 | 3 | 3 | N |
| Hartley et al. 2016 (33)    | Fibre intake + supplements                         | Diastolic blood pressure       | Schwingshackl et al. 2017 (32) | Whole grain intake         | Hypertension             | 2 | 2 | 2 | 3 | 3 | N |
| Hemmingsen et al. 2017 (34) | Healthy diet (intake)                              | Type 2 diabetes                | Schwingshackl et al. 2018 (35) | Diet quality (intake)      | Type 2 diabetes          | 2 | 1 | 1 | 1 | 2 | Y |
| Hemmingsen et al. 2017 (34) | Healthy diet (intake)                              | All-cause mortality            | Schwingshackl et al. 2018 (35) | Diet quality (intake)      | All-cause mortality      | 2 | 1 | 1 | 1 | 2 | Y |
| Hofmeyr et al. 2018 (36)    | Calcium supplements                                | Pre-eclampsia                  | Newberry et al. 2014 (37)      | Calcium intake             | Pre-eclampsia            | 2 | 2 | 2 | 1 | 2 | Y |
| Hofmeyr et al. 2018 (36)    | Calcium supplements                                | High blood pressure            | Newberry et al. 2014 (37)      | Calcium intake             | High blood pressure      | 2 | 2 | 2 | 1 | 2 | Y |
| Hooper et al. 2012 (38)     | Low fat / modified fat (intake + supplements)      | Cardiovascular mortality       | Noto et al. 2013 (39)          | High-carbohydrate intake   | Cardiovascular mortality | 2 | 2 | 2 | 1 | 2 | Y |
| Hooper et al. 2012 (38)     | Low fat / modified fat (intake + supplements)      | All-cause mortality            | Seidelmann et al. 2018 (40)    | High-carbohydrate intake   | All-cause mortality      | 2 | 2 | 2 | 1 | 2 | Y |
| Hooper et al. 2012 (38)     | Low fat / modified fat (intake + supplements)      | Combined cardiovascular events | Zhu et al. 2019 (9)            | Low fat intake             | Cardiovascular disease   | 2 | 2 | 2 | 1 | 2 | Y |
| Hooper et al. 2012 (38)     | Low fat intake                                     | Body weight                    | Sartorius et al. 2018 (41)     | High-carbohydrate intake   | Obesity                  | 2 | 2 | 2 | 3 | 3 | N |
| Hooper et al. 2015a (42)    | Low fat intake                                     | Body weight                    | Sartorius et al. 2018 (41)     | High-carbohydrate intake   | Obesity                  | 2 | 2 | 2 | 3 | 3 | N |
| Hooper et al. 2015b (43)    | Low saturated fat intake                           | All-cause mortality            | de Souza et al. 2015 (44)      | Low saturated fat intake   | All-cause mortality      | 2 | 1 | 1 | 1 | 2 | Y |
| Hooper et al. 2015b (43)    | Low saturated fat intake                           | Cardiovascular mortality       | de Souza et al. 2015 (44)      | Low saturated fat intake   | Cardiovascular mortality | 2 | 1 | 1 | 1 | 2 | Y |
| Hooper et al. 2015b (43)    | Low saturated fat intake                           | Combined cardiovascular events | de Souza et al. 2015 (44)      | Low saturated fat intake   | Coronary heart disease   | 2 | 1 | 1 | 1 | 2 | Y |
| Hooper et al. 2018 (45)     | Omega-6 fatty acids intake + supplements           | Combined cardiovascular events | Chowdhury et al. 2014a (2)     | Omega-6 fatty acids intake | Coronary heart disease   | 2 | 2 | 2 | 2 | 2 | Y |
| Hooper et al. 2018 (45)     | Omega-6 fatty acids intake + supplements           | All-cause mortality            | Li et al. 2020 (8)             | Linoleic acid intake       | All-cause mortality      | 2 | 2 | 2 | 1 | 2 | Y |
| Hooper et al. 2018 (45)     | Omega-6 fatty acids intake + supplements           | Cardiovascular mortality       | Li et al. 2020 (8)             | Linoleic acid intake       | Cardiovascular mortality | 2 | 2 | 2 | 1 | 2 | Y |
| Jin et al. 2012 (46)        | Total flavonoids intake (+co-dietary intervention) | Colorectal adenoma             | Jin et al. 2012 (46)           | Total flavonoids intake    | Colorectal cancer        | 3 | 2 | 2 | 3 | 3 | Y |



## Supplemental data

|                           |                                                |                             |                                |                             |                             |   |   |   |   |   |   |
|---------------------------|------------------------------------------------|-----------------------------|--------------------------------|-----------------------------|-----------------------------|---|---|---|---|---|---|
| Jin et al. 2012 (46)      | Isoflavonoes intake (+co-dietary intervention) | Colorectal adenoma          | Jin et al. 2012 (46)           | Isoflavonoes intake         | Colorectal cancer           | 3 | 2 | 2 | 3 | 3 | Y |
| Jin et al. 2012 (46)      | Flavonols intake (+co-dietary intervention)    | Colorectal adenoma          | Jin et al. 2012 (46)           | Flavonols intake            | Colorectal cancer           | 3 | 2 | 2 | 3 | 3 | Y |
| Keats et al. 2019 (47)    | Micronutrients supplements (folic acid + iron) | Preterm birth               | Wolf et al. 2017 (48)          | Multivitamin supplements    | Preterm birth               | 1 | 2 | 2 | 1 | 2 | Y |
| Keats et al. 2019 (47)    | Micronutrients supplements (folic acid + iron) | Low birth weight            | Wolf et al. 2017 (48)          | Multivitamin supplements    | Low birth weight            | 1 | 2 | 2 | 1 | 2 | Y |
| Keats et al. 2019 (47)    | Micronutrients supplements (folic acid + iron) | Small gestational age       | Wolf et al. 2017 (48)          | Multivitamin supplements    | Small gestational age       | 1 | 2 | 2 | 1 | 2 | Y |
| Kelly et al. 2017 (49)    | Whole grains intake                            | Systolic blood pressure     | Schwingshackl et al. 2017 (32) | Whole grain intake          | Hypertension                | 2 | 1 | 1 | 3 | 3 | N |
| Kelly et al. 2017 (49)    | Whole grains intake                            | Diastolic blood pressure    | Schwingshackl et al. 2017 (32) | Whole grain intake          | Hypertension                | 2 | 1 | 1 | 3 | 3 | N |
| Kelly et al. 2017 (49)    | Whole grains intake                            | Body weight                 | Ye et al. 2012 (50)            | Whole grain intake          | Body weight                 | 2 | 1 | 1 | 1 | 2 | Y |
| Mathew et al. 2012 (51)   | $\beta$ -carotene supplements                  | Cataract                    | Jiang et al. 2019 (52)         | $\beta$ -carotene intake    | Cataract                    | 2 | 2 | 2 | 1 | 2 | Y |
| Mathew et al. 2012 (51)   | Vitamin E supplements                          | Cataract                    | Jiang et al. 2019 (52)         | Vitamin E intake            | Cataract                    | 2 | 2 | 2 | 1 | 2 | Y |
| Mathew et al. 2012 (51)   | Vitamin C supplements                          | Cataract                    | Jiang et al. 2019 (52)         | Vitamin C intake            | Cataract                    | 2 | 2 | 2 | 1 | 2 | Y |
| Palacios et al. 2019 (53) | Vitamin D supplements                          | Gestational diabetes        | Hu et al. 2018 (54)            | Vitamin D status            | Gestational diabetes        | 1 | 3 | 3 | 1 | 3 | Y |
| Palacios et al. 2019 (53) | Vitamin D supplements                          | Preterm birth               | Tous et al. 2020 (55)          | Vitamin D status            | Preterm birth               | 1 | 3 | 3 | 1 | 3 | Y |
| Palacios et al. 2019 (53) | Vitamin D supplements                          | Birth length                | Tous et al. 2020 (55)          | Vitamin D status            | Birth length                | 2 | 3 | 3 | 1 | 3 | Y |
| Palacios et al. 2019 (53) | Vitamin D supplements                          | Birth weight                | Tous et al. 2020 (55)          | Vitamin D status            | Birth weight                | 2 | 3 | 3 | 1 | 3 | Y |
| Palacios et al. 2019 (53) | Vitamin D supplements                          | Head circumference at birth | Tous et al. 2020 (55)          | Vitamin D status            | Head circumference at birth | 2 | 3 | 3 | 1 | 3 | Y |
| Palacios et al. 2019 (53) | Vitamin D supplements                          | Pre-eclampsia               | Yuan et al. 2019 (56)          | Vitamin D status            | Pre-eclampsia               | 1 | 3 | 3 | 1 | 3 | Y |
| Rees et al. 2013a (57)    | Healthy diet (intake)                          | Systolic blood pressure     | Kastorini et al. 2011 (58)     | Mediterranean diet (intake) | Systolic blood pressure     | 2 | 1 | 1 | 1 | 2 | Y |
| Rees et al. 2013a (57)    | Healthy diet (intake)                          | Diastolic blood pressure    | Kastorini et al. 2011 (58)     | Mediterranean diet (intake) | Diastolic blood pressure    | 2 | 1 | 1 | 1 | 2 | Y |
| Rees et al. 2013b (59)    | Selenium supplements                           | All-cause mortality         | Jayed et al. 2018 (60)         | Selenium intake             | All-cause mortality         | 2 | 2 | 2 | 1 | 2 | Y |
| Rees et al. 2013b (59)    | Selenium supplements                           | Cardiovascular mortality    | Xiang et al. 2019 (61)         | Selenium status             | Cardiovascular mortality    | 2 | 3 | 3 | 1 | 3 | Y |

## Supplemental data

|                           |                                     |                                |                                  |                             |                          |   |   |   |   |   |   |
|---------------------------|-------------------------------------|--------------------------------|----------------------------------|-----------------------------|--------------------------|---|---|---|---|---|---|
| Rees et al. 2013b (59)    | Selenium supplements                | Combined cardiovascular events | Zhang et al. 2016a (62)          | Selenium status             | Cardiovascular disease   | 2 | 3 | 3 | 1 | 3 | Y |
| Rees et al. 2019 (63)     | Mediterranean diet (intake)         | High Density Lipoprotein       | Kastorini et al. 2011 (58)       | Mediterranean diet (intake) | High Density Lipoprotein | 2 | 1 | 1 | 1 | 2 | Y |
| Rees et al. 2019 (63)     | Mediterranean diet (intake)         | Triglycerides                  | Kastorini et al. 2011 (58)       | Mediterranean diet (intake) | Triglycerides            | 2 | 1 | 1 | 1 | 2 | Y |
| Rees et al. 2019 (63)     | Mediterranean diet (intake)         | Systolic blood pressure        | Kastorini et al. 2011 (58)       | Mediterranean diet (intake) | Systolic blood pressure  | 2 | 1 | 1 | 1 | 2 | Y |
| Rees et al. 2019 (63)     | Mediterranean diet (intake)         | Cardiovascular mortality       | Rosato et al. 2019 (64)          | Mediterranean diet (intake) | Cardiovascular mortality | 2 | 1 | 1 | 1 | 2 | Y |
| Rees et al. 2019 (63)     | Mediterranean diet (intake)         | Combined cardiovascular events | Rosato et al. 2019 (64)          | Mediterranean diet (intake) | Cardiovascular disease   | 2 | 1 | 1 | 1 | 2 | Y |
| Rees et al. 2019 (63)     | Mediterranean diet (intake)         | All-cause mortality            | Soltani et al. 2019 (65)         | Mediterranean diet (intake) | All-cause mortality      | 2 | 1 | 1 | 1 | 2 | Y |
| Rutjes et al. 2018 (66)   | B-Vitamin supplements               | Dementia /MCI                  | Doets et al. 2013 (67)           | Vitamin B12 intake          | Dementia                 | 3 | 2 | 2 | 2 | 3 | Y |
| Rutjes et al. 2018 (66)   | Vitamin D3 supplements              | Dementia                       | Goodwill et al. 2017 (68)        | Vitamin D status            | Dementia / MCI           | 1 | 3 | 3 | 3 | 3 | Y |
| Sydenham et al. 2012 (69) | Omega-3 fatty acids supplements     | Mini-Mental State Examination  | Zhang et al. 2016b (70)          | Omega-3 fatty acids intake  | Dementia                 | 1 | 2 | 2 | 3 | 3 | N |
| Tieu et al. 2017 (71)     | Healthy diet (intake)               | Preterm birth                  | Chia et al. 2019 (72)            | Healthy diet (intake)       | Preterm birth            | 2 | 1 | 1 | 1 | 2 | Y |
| Tieu et al. 2017 (71)     | Healthy diet (intake)               | Small gestational age          | Chia et al. 2019 (72)            | Healthy diet (intake)       | Small gestational age    | 2 | 1 | 1 | 1 | 2 | Y |
| Tieu et al. 2017 (71)     | Healthy diet (intake)               | Birth weight                   | Chia et al. 2019 (72)            | Healthy diet (intake)       | Birth weight             | 2 | 1 | 1 | 1 | 2 | Y |
| Tieu et al. 2017 (71)     | Healthy diet (intake)               | Gestational diabetes           | Mijatovic-Vukas et al. 2018 (73) | Mediterranean diet (intake) | Gestational diabetes     | 2 | 1 | 1 | 1 | 2 | Y |
| Usinger et al. 2012 (74)  | Fermented milk intake + supplements | Systolic blood pressure        | Soedamah-Muthu et al. 2012 (75)  | Fermented milk intake       | Hypertension             | 2 | 2 | 2 | 3 | 3 | N |
| Usinger et al. 2012 (74)  | Fermented milk intake + supplements | Diastolic blood pressure       | Soedamah-Muthu et al. 2012 (75)  | Fermented milk intake       | Hypertension             | 2 | 2 | 2 | 3 | 3 | N |
| Vinceti et al. 2018 (76)  | Selenium supplements                | Cancer                         | Vinceti et al. 2018 (76)         | Selenium status             | Cancer                   | 2 | 3 | 3 | 1 | 3 | Y |
| Vinceti et al. 2018 (76)  | Selenium supplements                | Cancer mortality               | Vinceti et al. 2018 (76)         | Selenium intake             | Cancer mortality         | 2 | 2 | 2 | 1 | 2 | Y |
| Vinceti et al. 2018 (76)  | Selenium supplements                | Colorectal cancer              | Vinceti et al. 2018 (76)         | Selenium supplements        | Colorectal cancer        | 2 | 1 | 1 | 1 | 2 | Y |
| Yao et al. 2017 (77)      | Fibre intake                        | Colorectal cancer              | Aune et al. 2011 (78)            | Fibre intake                | Colorectal cancer        | 2 | 1 | 1 | 1 | 2 | Y |
| Yao et al. 2017 (77)      | Fibre intake                        | Colorectal adenoma             | Ben et al. 2014 (79)             | Fibre intake                | Colorectal adenoma       | 3 | 1 | 1 | 1 | 3 | Y |

## Supplemental data

HOMA-IR: homeostasis model assessment-insulin resistance; MCI: mild cognitive impairment; PI/ECO: population – intervention/exposure – comparator – outcome;

Supplemental data

Supplementary Table 3: Differences between published (original reported) effect estimates and re-calculated effect estimates.

| Original reported                         |                                                        |                                        |                            | Re-calculated              |
|-------------------------------------------|--------------------------------------------------------|----------------------------------------|----------------------------|----------------------------|
| Author, year<br>(Supplementary Reference) | Intervention / Exposure<br>(as defined by the authors) | Outcome<br>(as defined by the authors) | RR/HR/OR or MD<br>(95% CI) | RR/HR/OR or MD<br>(95% CI) |
| Abdelhamid et al. 2018b (7)               | Polyunsaturated fat intake                             | Major cardiovascular events            | RR: 0.84 (0.59; 1.20)      | RR: 0.84 (0.60; 1.20)      |
| Adler et al. 2014 (10)                    | Low sodium intake                                      | All-cause mortality                    | RR: 0.96 (0.83; 1.10)      | RR: 0.96 (0.84; 1.11)      |
| Adler et al. 2014 (10)                    | Low sodium intake                                      | Cardiovascular disease                 | RR: 0.76 (0.57; 1.01)      | RR: 0.76 (0.57; 1.02)      |
| Aune et al. 2018 (14)                     | Vitamin C intake                                       | Cardiovascular disease                 | RR: 0.84 (0.77; 0.91)      | RR: 0.84 (0.78; 0.91)      |
| Aune et al. 2018 (14)                     | Vitamin E intake                                       | All-cause mortality                    | RR: 0.98 (0.93; 1.04)      | RR: 0.98 (0.92; 1.04)      |
| Avenell et al. 2014 (15)                  | Vitamin D supplements                                  | Any fracture                           | RR: 1.04 (0.96; 1.12)      | RR: 1.04 (0.95; 1.15)      |
| Ben et al. 2014 (79)                      | Fibre intake                                           | Colorectal adenoma                     | RR: 0.92 (0.76; 1.10)      | RR: 0.92 (0.76; 1.11)      |
| Bjelakovic et al. 2014a (18)              | Vitamin D supplements                                  | All-cause mortality                    | RR: 0.97 (0.94; 0.99)      | RR: 0.97 (0.94; 1.00)      |
| Chowdhury et al. 2014a (2)                | Omega-6 fatty acids intake                             | Coronary heart disease                 | RR: 0.98 (0.90; 1.06)      | RR: 0.98 (0.90; 1.07)      |
| Chowdhury et al. 2014b (19)               | Vitamin D status                                       | All-cause mortality                    | RR: 0.69 (0.65; 0.75)      | RR: 0.70 (0.65; 0.75)      |
| Chowdhury et al. 2014b (19)               | Vitamin D status                                       | Cardiovascular mortality               | RR: 0.70 (0.61; 0.80)      | RR: 0.69 (0.60; 0.79)      |
| de Souza et al. 2015 (44)                 | Low saturated fat intake                               | Cardiovascular mortality               | RR: 1.03 (0.89; 1.19)      | RR: 1.03 (0.89; 1.18)      |
| de Souza et al. 2015 (44)                 | Low saturated fat intake                               | Coronary heart disease                 | RR: 0.94 (0.85; 1.05)      | RR: 0.95 (0.86; 1.05)      |
| Feng et al. 2017 (16)                     | Vitamin D status                                       | Hip fracture                           | RR: 0.68 (0.60; 0.78)      | RR: 0.62 (0.53; 0.71)      |
| Feng et al. 2017 (16)                     | Vitamin D status                                       | Any fracture                           | RR: 0.80 (0.68; 0.94)      | RR: 0.71 (0.58; 0.86)      |
| Goodwill et al. 2017 (68)                 | Vitamin D status                                       | Dementia / MCI                         | OR: 0.88 (0.81; 0.95)      | OR: 0.88 (0.82; 0.95)      |
| Hofmeyr et al. 2018 (36)                  | Calcium supplements                                    | Pre-eclampsia                          | RR: 0.45 (0.31; 0.65)      | RR: 0.47 (0.33; 0.68)      |
| Jiang et al. 2019 (52)                    | Vitamin E intake                                       | Cataract                               | RR: 0.90 (0.80; 1.00)      | RR: 0.88 (0.75; 1.03)      |
| Jiang et al. 2019 (52)                    | Vitamin C intake                                       | Cataract                               | RR: 0.80 (0.72; 0.88)      | RR: 0.74 (0.59; 0.95)      |
| Kastorini et al. 2011 (58)                | Mediterranean diet (intake)                            | High Density Lipoprotein (mmol/L)      | MD: 0.01 (-0.046; 0.061)   | MD: 0.01 (-0.04; 0.06)     |
| Kastorini et al. 2011 (58)                | Mediterranean diet (intake)                            | Triglycerides (mmol/L)                 | MD: -0.023 (-0.076; 0.031) | MD: -0.02 (-0.07; 0.03)    |
| Keats et al. 2019 (47)                    | Micronutrients supplements                             | Preterm birth                          | RR: 0.95 (0.90; 1.01)      | RR: 0.95 (0.89; 1.01)      |
| Keats et al. 2019 (47)                    | Micronutrients supplements                             | Small gestational age                  | RR: 0.92 (0.88; 0.97)      | RR: 0.92 (0.87; 0.97)      |
| Leyvraz et al. 2018 (12)                  | Low sodium intake + status                             | Diastolic blood pressure (mmHg)        | MD: 1.20 (1.00; 1.50)      | MD: 1.20 (0.95; 1.45)      |
| Li et al. 2020 (8)                        | Linoleic acid intake                                   | Cardiovascular mortality               | RR: 0.87 (0.82; 0.92)      | RR: 0.86 (0.81; 0.92)      |
| Noto et al. 2013 (39)                     | High-carbohydrate intake                               | Cardiovascular mortality               | RR: 0.91 (0.81; 1.02)      | RR: 0.91 (0.81; 1.03)      |
| Rees et al. 2013b (59)                    | Selenium supplements                                   | Cardiovascular mortality               | RR: 0.97 (0.79; 1.20)      | RR: 1.02 (0.74; 1.41)      |
| Rees et al. 2019 (63)                     | Mediterranean diet (intake)                            | Triglycerides (mmol/L)                 | MD: -0.09 (-0.16; -0.01)   | MD: -0.09 (-0.17; -0.01)   |
| Rosato et al. 2019 (64)                   | Mediterranean diet (intake)                            | Cardiovascular mortality               | RR: 0.73 (0.67; 0.81)      | RR: 0.74 (0.67; 0.81)      |
| Seidemann et al. 2018 (40)                | High-carbohydrate intake                               | All-cause mortality                    | RR: 0.83 (0.76; 0.92)      | RR: 0.83 (0.75; 0.92)      |
| Soltani et al. 2019 (65)                  | Mediterranean diet (intake)                            | All-cause mortality                    | RR: 0.90 (0.89; 0.91)      | RR: 0.90 (0.89; 0.92)      |
| Tieu et al. 2017 (71)                     | Healthy diet (intake)                                  | Preterm birth                          | RR: 0.51 (0.21; 1.25)      | RR: 0.52 (0.21; 1.28)      |

## Supplemental data

|                         |                            |                        |                       |                       |
|-------------------------|----------------------------|------------------------|-----------------------|-----------------------|
| Tieu et al. 2017 (71)   | Healthy diet (intake)      | Gestational diabetes   | RR: 0.60 (0.35; 1.04) | RR: 0.61 (0.36; 1.04) |
| Tous et al. 2020 (55)   | Vitamin D status           | Preterm birth          | OR: 0.78 (0.65; 0.93) | OR: 0.77 (0.65; 0.92) |
| Yao et al. 2017 (77)    | Fibre intake               | Colorectal cancer      | RR: 2.7 (1.07; 6.85)  | RR: 2.69 (1.06; 6.82) |
| Yao et al. 2017 (77)    | Fibre intake               | Colorectal adenoma     | RR: 1.04 (0.95; 1.13) | RR: 1.04 (0.94; 1.14) |
| Yuan et al. 2019 (56)   | Vitamin D status           | Pre-eclampsia          | OR: 0.62 (0.50; 0.78) | OR: 0.62 (0.50; 0.77) |
| Zhang et al. 2015 (23)  | Vitamin D intake           | Lung cancer            | RR: 0.89 (0.74; 1.06) | RR: 0.89 (0.77; 1.03) |
| Zhang et al. 2016a (62) | Selenium status            | Cardiovascular disease | RR: 0.87 (0.76; 0.99) | RR: 0.87 (0.76; 1.00) |
| Zhu et al. 2019 (9)     | Polyunsaturated fat intake | Cardiovascular disease | RR: 0.97 (0.93; 1.00) | RR: 0.97 (0.93; 1.01) |
| Zhu et al. 2019 (9)     | Low fat intake             | Cardiovascular disease | RR: 1.03 (0.99; 1.08) | RR: 1.03 (0.99; 1.07) |

CI: confidence interval; HR: hazard ratio; MCI: mild cognitive impairment; MD: mean difference; OR: odds ratio; RR: risk ratio.

Supplemental data

Supplementary Table 4: Reason for exclusion form the pooling scenario

| Systematic reviews of RCTs             |                                                                   | Systematic reviews of cohort studies |                                                                  | Reason for exclusion                                                                                                                                                 |
|----------------------------------------|-------------------------------------------------------------------|--------------------------------------|------------------------------------------------------------------|----------------------------------------------------------------------------------------------------------------------------------------------------------------------|
| Author, year (Supplementary Reference) | Outcome                                                           | Reference                            | Outcome                                                          |                                                                                                                                                                      |
| Abdelhamid et al. 2018a (1)            | Body weight (MD)                                                  | Schlesinger et al. (4)               | Weight gain (RR)                                                 | Body weight on continuous scale vs. weight gain on binary scale                                                                                                      |
| Abdelhamid et al. 2018a (1)            | Cardiovascular mortality (RR)                                     | Chowdhury et al. 2014a (2)           | CHD mortality (RR)                                               | Forest plot of Chowdhury et al. 2014a (2) not available                                                                                                              |
| Al-Khudairy et al. 2017 (13)           | Cardiovascular mortality (RR)                                     | Aune et al. 2018 (14)                | Cardiovascular mortality (RR)                                    | Forest plot of Aune et al. 2018 (14) not available                                                                                                                   |
| Cormick et al. 2015 (24)               | SBP (MD)                                                          | Jayedí et al. 2019 (25)              | Hypertension (RR)                                                | Impossibility to convert one outcome to the other one                                                                                                                |
| Cormick et al. 2015 (24)               | DBP (MD)                                                          | Jayedí et al. 2019 (25)              | Hypertension (RR)                                                |                                                                                                                                                                      |
| El Dib et al. 2015 (29)                | HOMA-IR (MD)                                                      | Fernandez-Cao et al. 2019 (30)       | T2D (RR)                                                         | Impossibility to convert one outcome to the other one                                                                                                                |
| Hartley et al. 2013 (31)               | SBP (MD)                                                          | Schwingshackl et al. 2017 (32)       | Hypertension (RR)                                                | Impossibility to convert one outcome to the other one                                                                                                                |
| Hartley et al. 2013 (31)               | DBP (MD)                                                          | Schwingshackl et al. 2017 (32)       | Hypertension (RR)                                                |                                                                                                                                                                      |
| Hartley et al. 2016 (33)               | SBP (MD)                                                          | Schwingshackl et al. 2017 (32)       | Hypertension (RR)                                                | Impossibility to convert one outcome to the other one                                                                                                                |
| Hartley et al. 2016 (33)               | DBP (MD)                                                          | Schwingshackl et al. 2017 (32)       | Hypertension (RR)                                                |                                                                                                                                                                      |
| Hooper et al. 2012 (38)                | Body weight (MD)<br>(the intervention is “dietary fat reduction”) | Sartorius et al. 2018 (41)           | Obesity (RR)<br>(the intervention is “high-carbohydrate intake”) | Impossibility to convert one outcome to the other one (moreover intervention in the RCTs meta-analysis too different from the intervention in the CSs meta-analysis) |
| Hooper et al. 2015a (42)               | Body weight (MD)<br>(the intervention is “dietary fat reduction”) | Sartorius et al. 2018 (41)           | Obesity (RR)<br>(the intervention is “high-carbohydrate intake”) |                                                                                                                                                                      |
| Kelly et al. 2017 (49)                 | SBP (MD)                                                          | Schwingshackl et al. 2017 (32)       | Hypertension (RR)                                                | Impossibility to convert one outcome to the other one                                                                                                                |
| Kelly et al. 2017 (49)                 | DBP (MD)                                                          | Schwingshackl et al. 2017 (32)       | Hypertension (RR)                                                |                                                                                                                                                                      |
| Sydenham et al. 2012 (69)              | MMSE (MD)                                                         | Zhang 2016b et al. (70)              | Dementia (RR)                                                    | Impossibility to convert one outcome to the other one                                                                                                                |
| Usinger et al. 2012 (74)               | SBP (MD)                                                          | Soedamah-Muthu et al. 2012 (75)      | Hypertension (RR)                                                | Impossibility to convert one outcome to the other one                                                                                                                |
| Usinger et al. 2012 (74)               | DBP (MD)                                                          | Soedamah-Muthu et al. 2012 (75)      | Hypertension (RR)                                                |                                                                                                                                                                      |

CS: cohort studies; DBP: diastolic blood pressure; HOMA-IR: homeostasis model assessment-insulin resistance; MD: mean difference; MMSE: Mini-Mental State Examination; RCTs: randomized controlled trials; RR: risk ratio; SBP: systolic blood pressure; T2D: type 2 diabetes.

Supplemental data

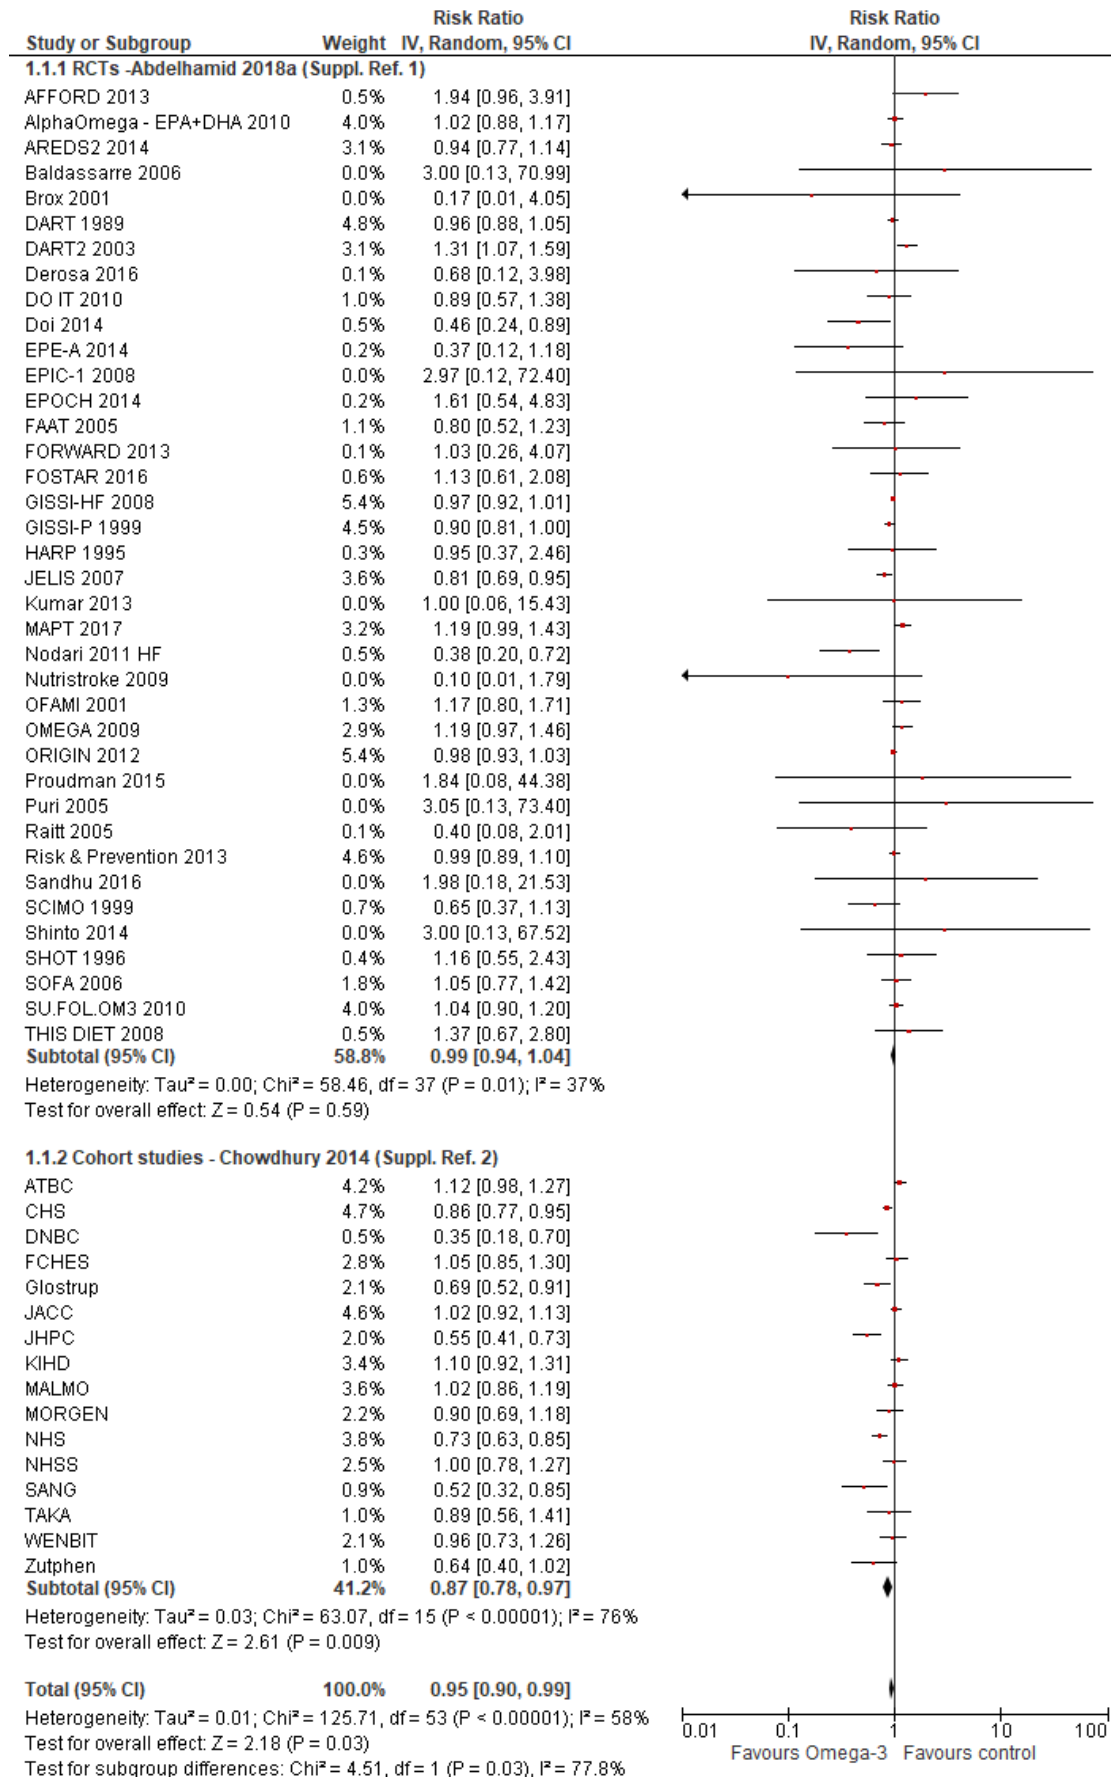

Supplementary Figure 1: Abdelhamid et al. 2018a (1) / Chowdhury et al. 2014a (2); Intervention/ Exposure: Omega-3 fatty acids; Outcome: Cardiovascular disease/ Coronary heart disease

Supplemental data

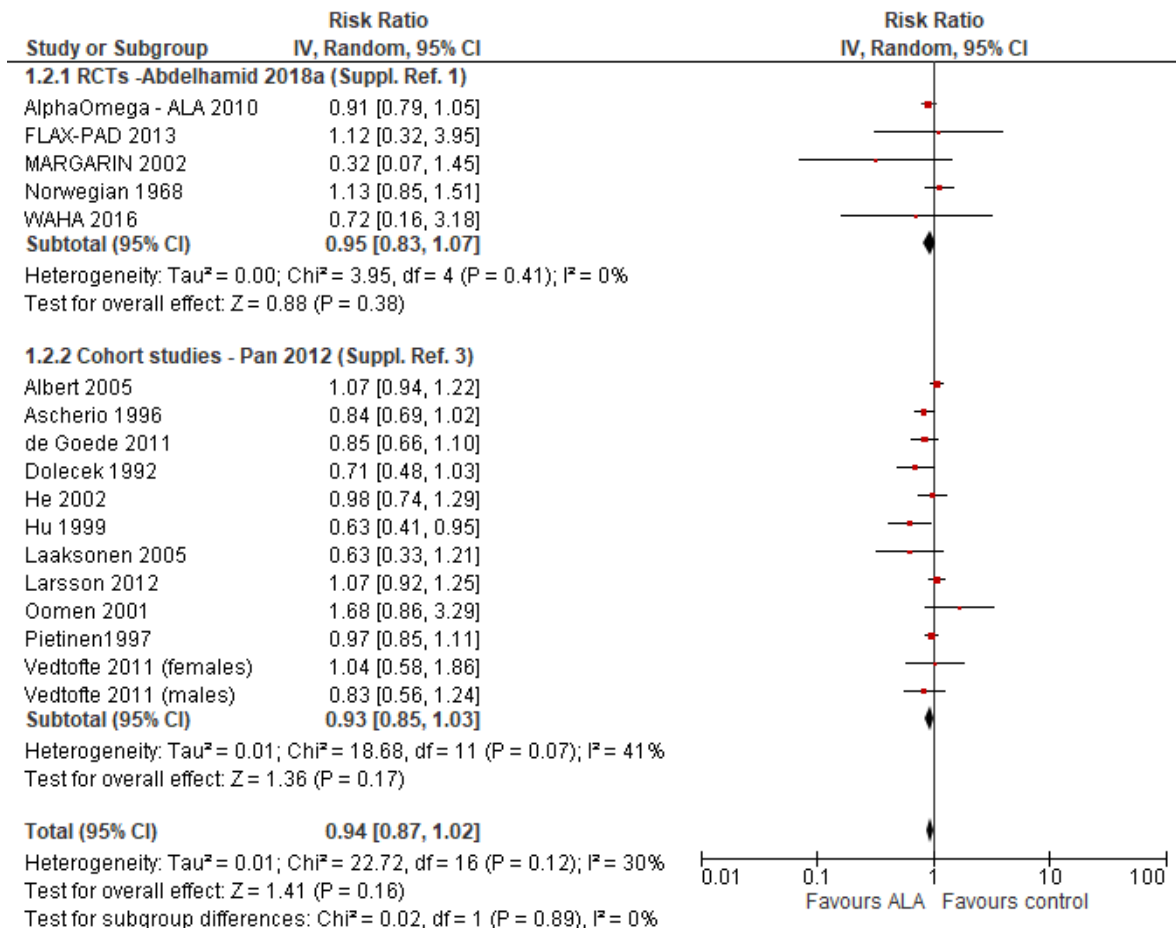

Supplementary Figure 2: Abdelhamid et al. 2018a (1) / Pan et al. et al. 2012 (3); Intervention/ Exposure:  $\alpha$ -Linolenic acid (ALA); Outcome: Cardiovascular disease



Supplemental data

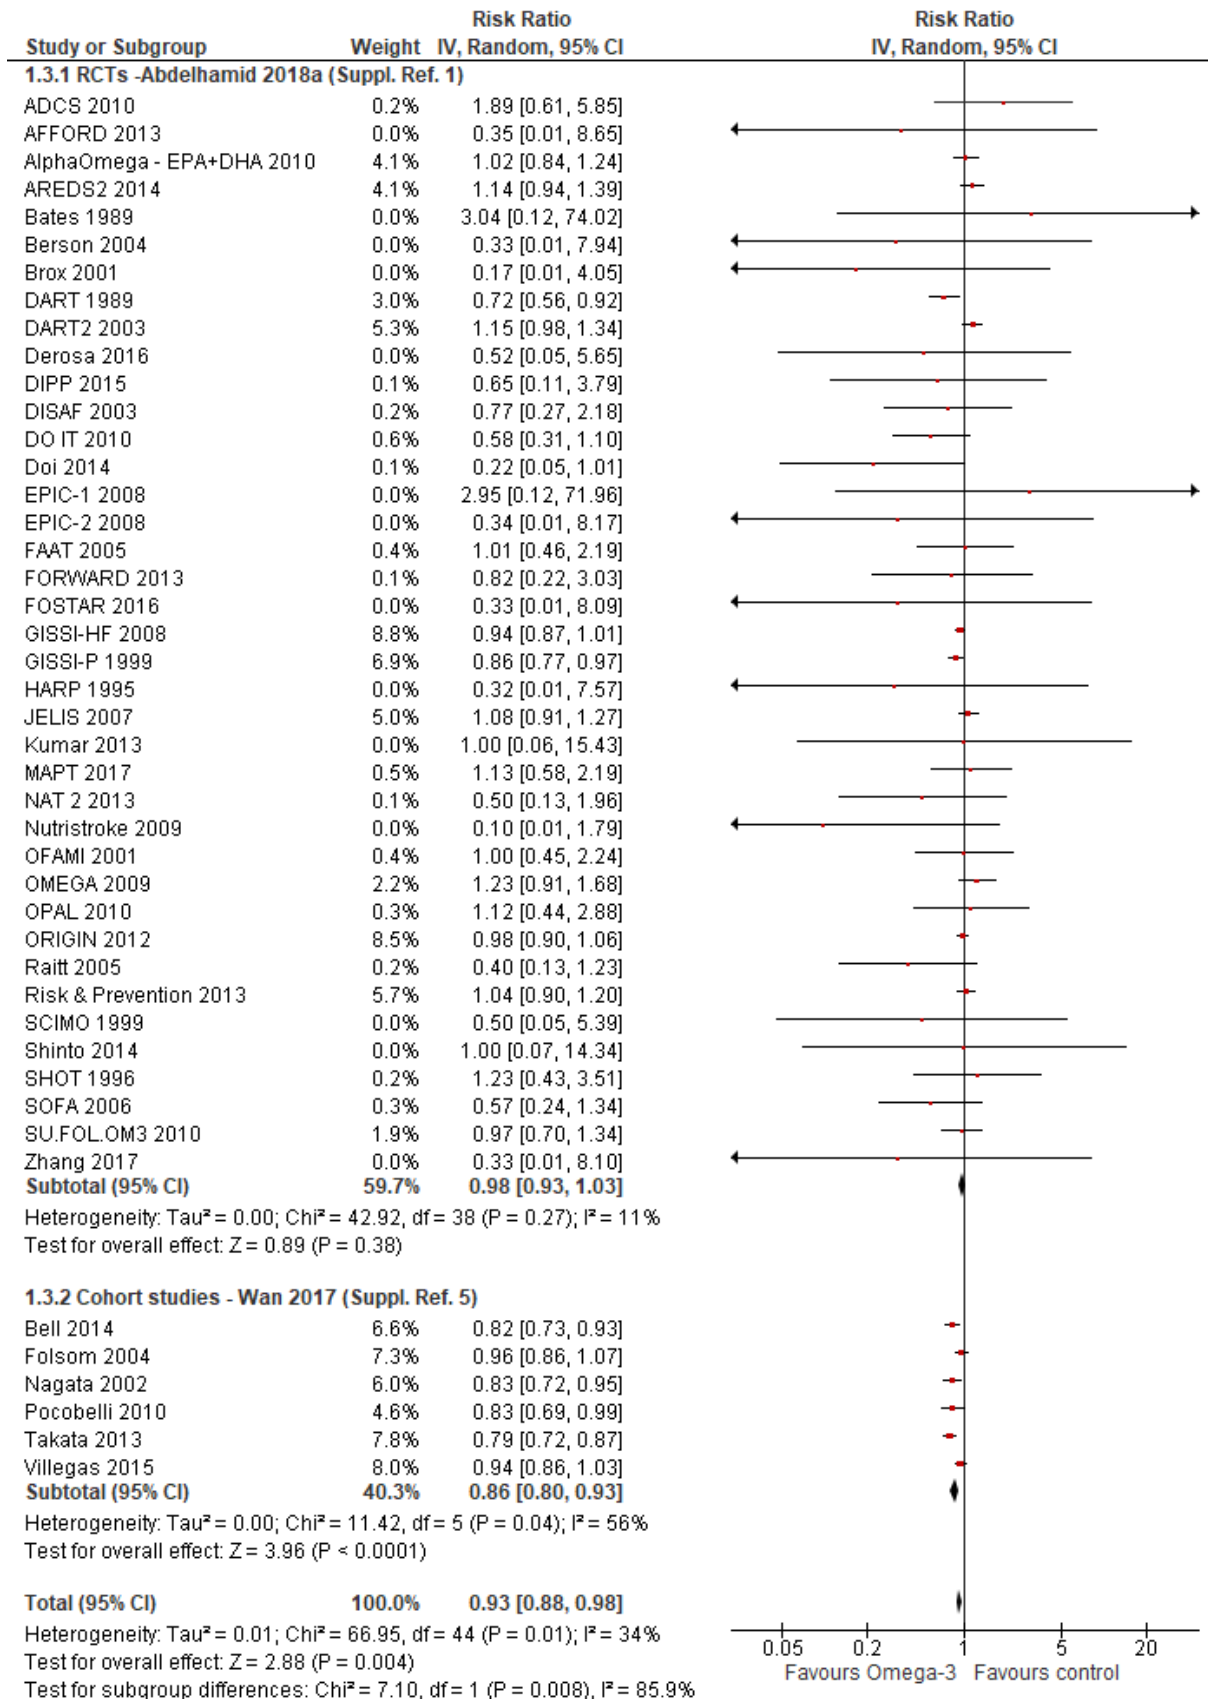

Supplementary Figure 3: Abdelhamid et al. 2018a (1) / Wan et al. 2017 (5); Intervention/ Exposure: Omega-3 fatty acids; Outcome: All-cause mortality

Supplemental data

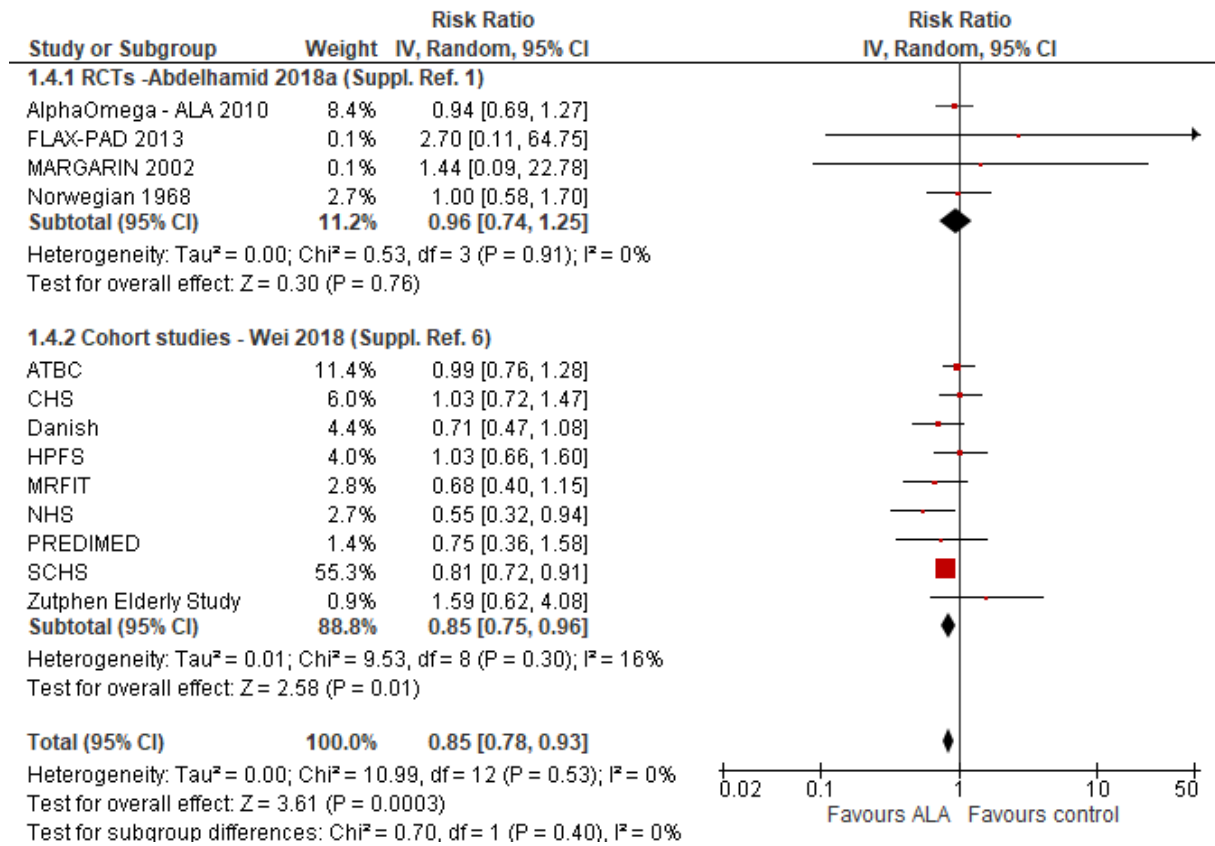

Supplementary Figure 4: Abdelhamid et al. 2018a (1) / Wei et al. 2018 (6); Intervention/ Exposure:  $\alpha$ -Linolenic acid (ALA); Outcome: Cardiovascular mortality/ Coronary heart disease mortality

Supplemental data

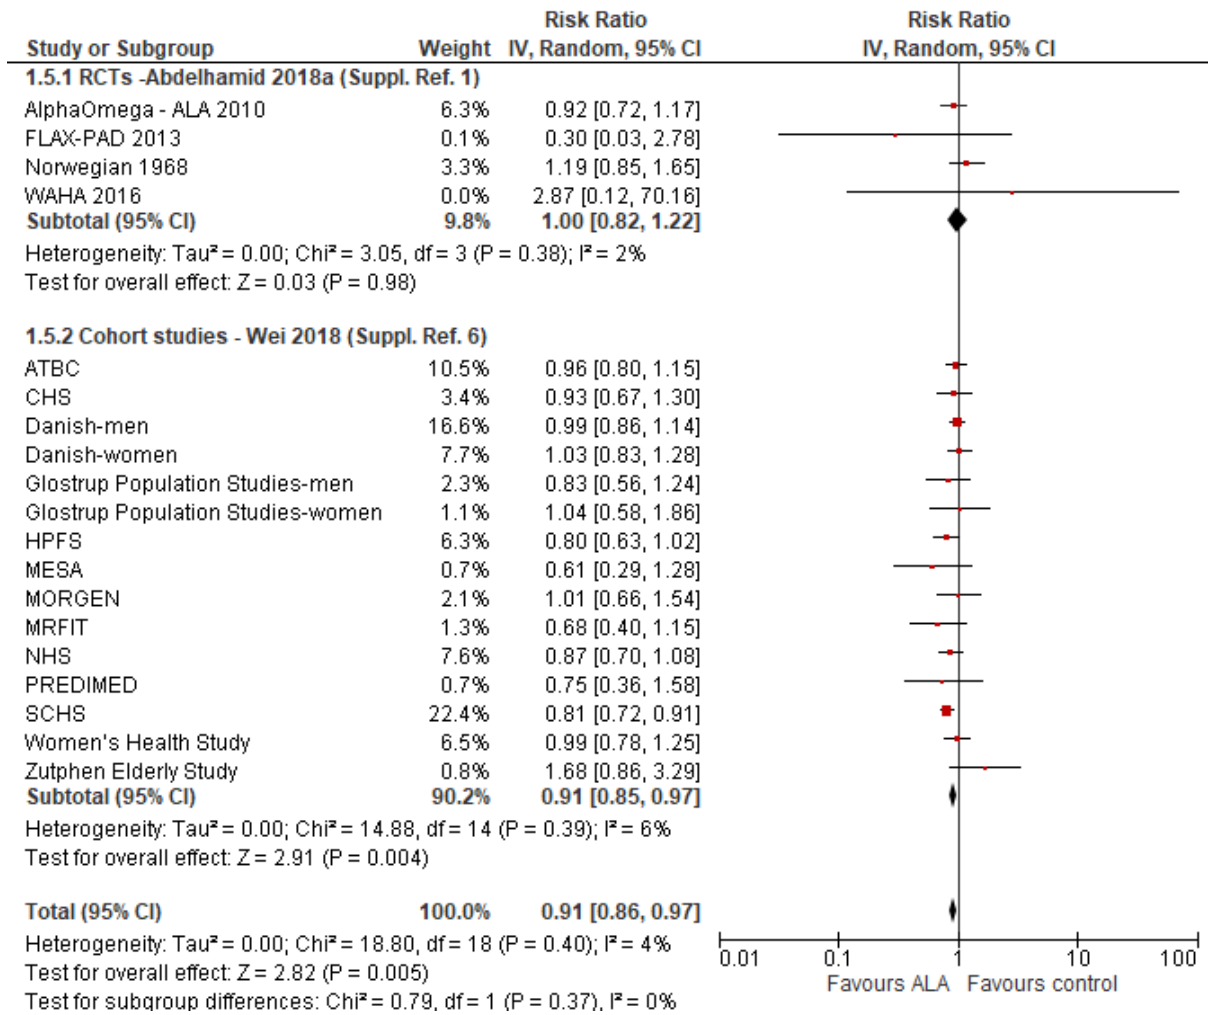

Supplementary Figure 5: Abdelhamid et al. 2018a (1) / Wei et al. 2018 (6); Intervention/ Exposure:  $\alpha$ -Linolenic acid (ALA); Outcome: Coronary heart disease

Supplemental data

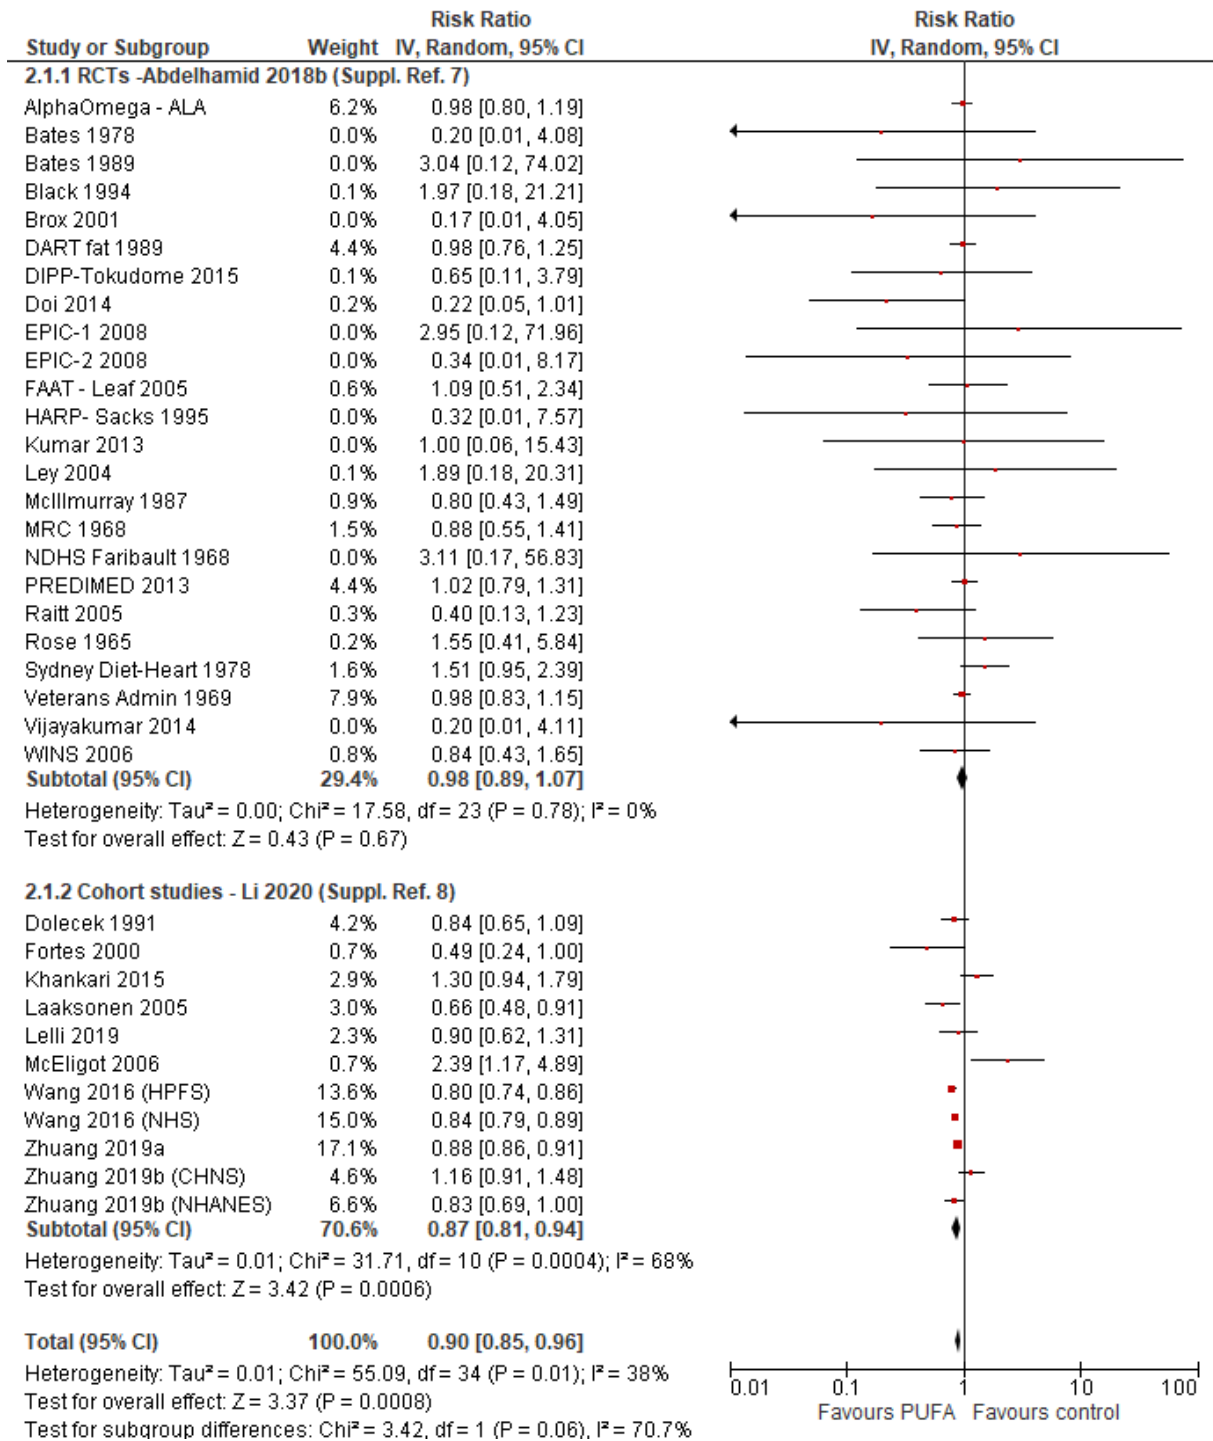

Supplementary Figure 6: Abdelhamid et al. 2018b (7) / Li et al. 2020 (8); Intervention/ Exposure: Polyunsaturated fat/ Omega-3 fatty acids; Outcome: All-cause mortality

Supplemental data

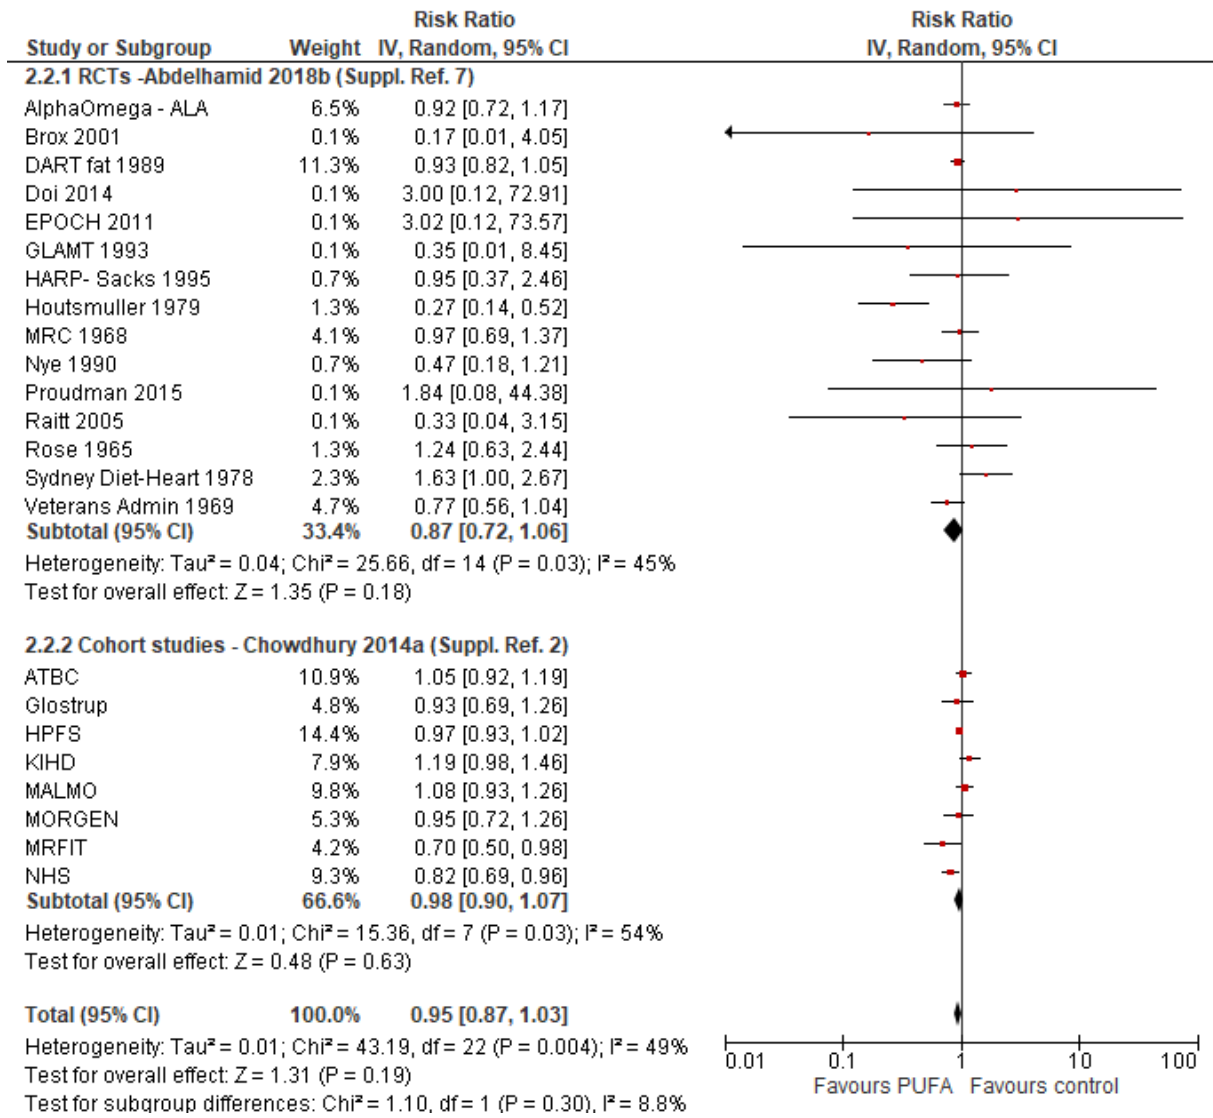

Supplementary Figure 7: Abdelhamid et al. 2018b (7) / Chowdhury et al. 2014a (2); Intervention/ Exposure: Polyunsaturated fat/ Omega-6 fatty acids; Outcome: Coronary heart disease

Supplemental data

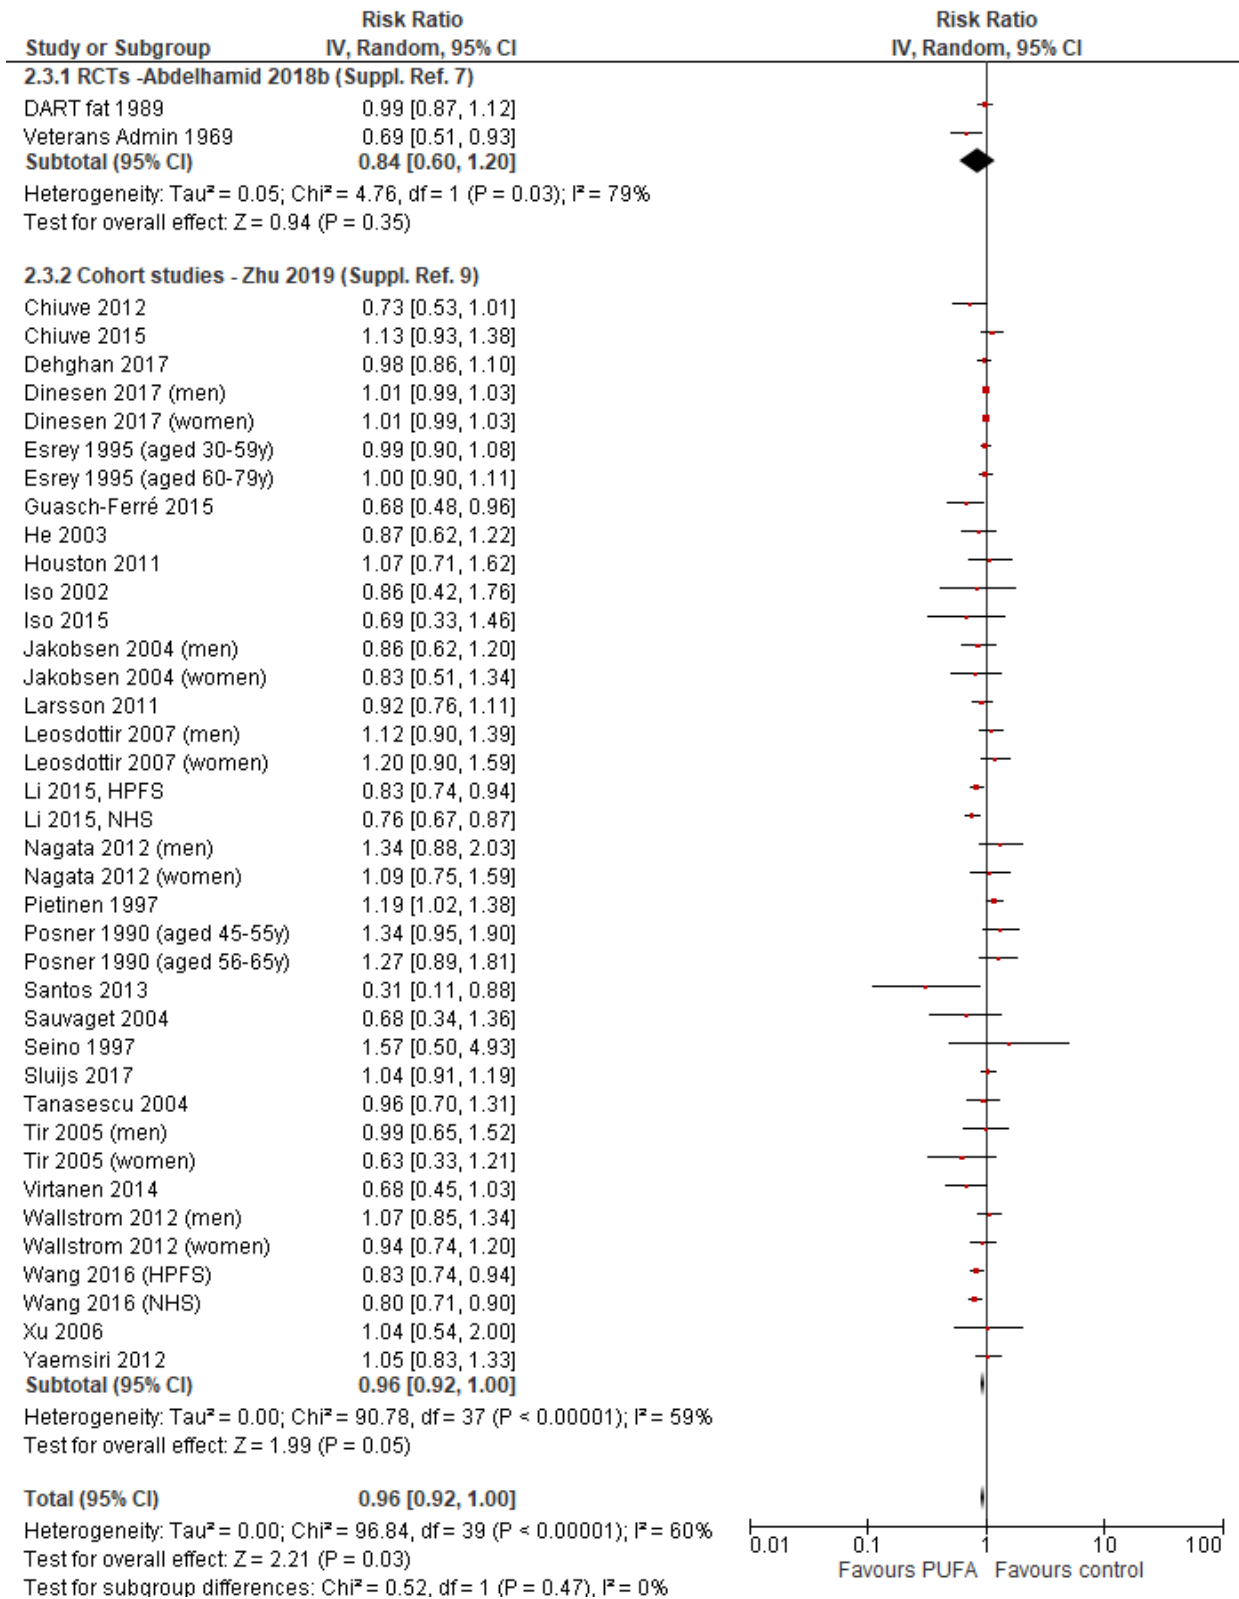

Supplementary Figure 8: Abdelhamid et al. 2018b (7) / Zhu et al. 2019 (9); Intervention/ Exposure: Polyunsaturated fat; Outcome: Major cardiovascular events/ Cardiovascular disease

Supplemental data

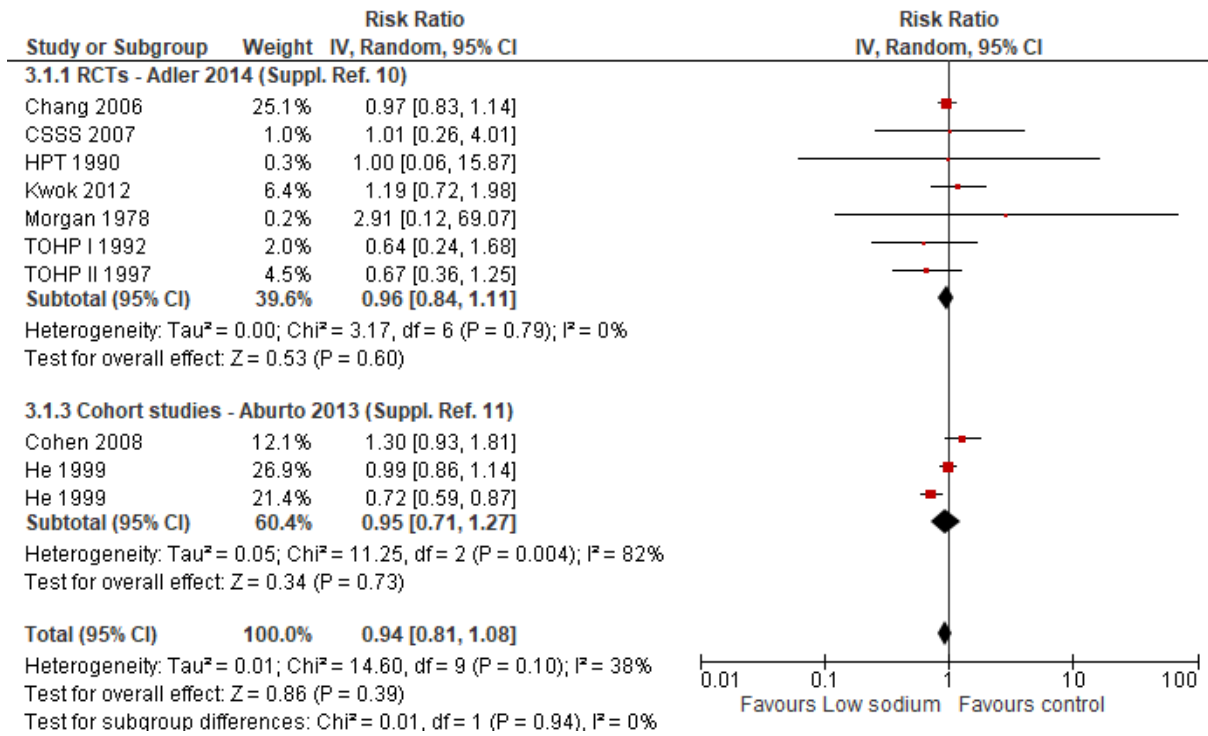

Supplementary Figure 9: Adler et al. 2014 (10) / Aburto et al. 2013 (11); Intervention/ Exposure: Low sodium; Outcome: All-cause mortality

Supplemental data

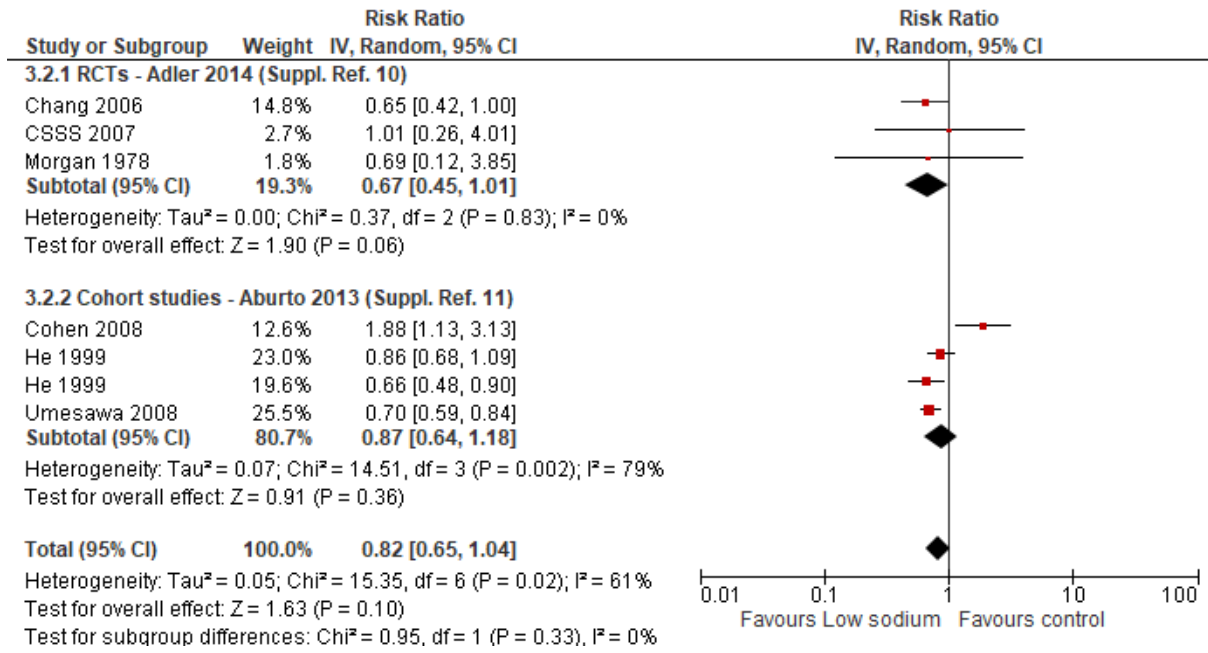

Supplementary Figure 10: Adler et al. 2014 (10) / Aburto et al. 2013 (11); Intervention/ Exposure: Low sodium; Outcome: Cardiovascular mortality



Supplemental data

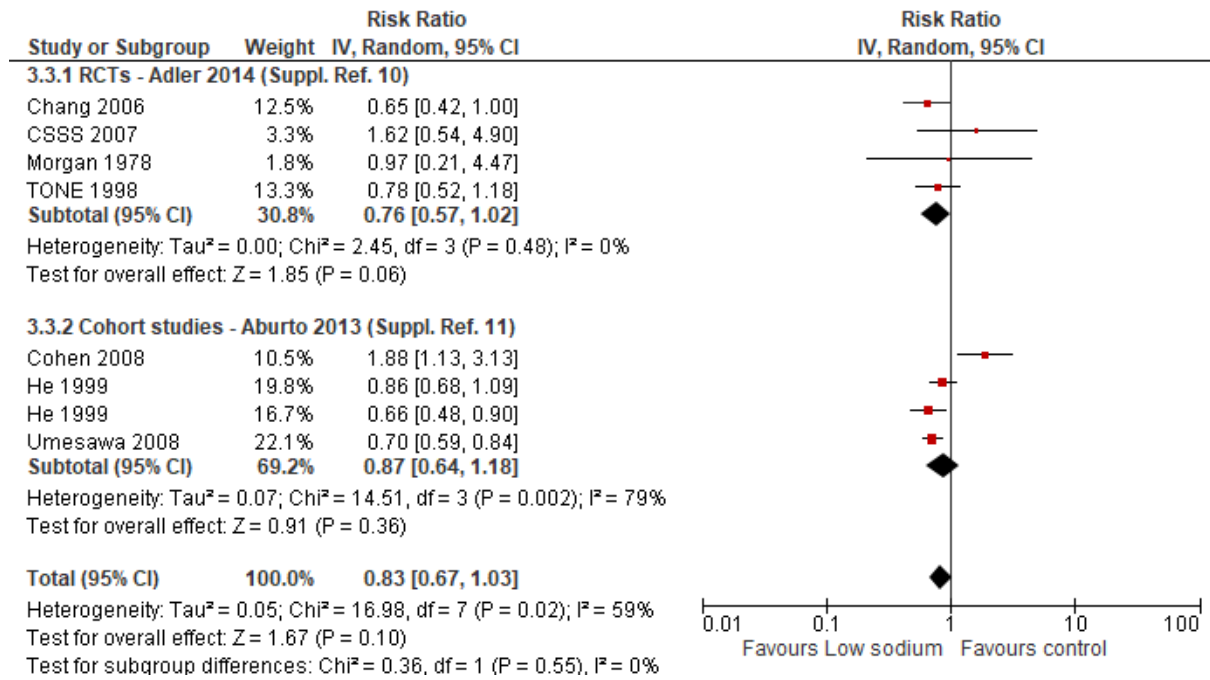

Supplementary Figure 11: Adler et al. 2014 (10) / Aburto et al. 2013 (11); Intervention/ Exposure: Low sodium; Outcome: Cardiovascular disease

Supplemental data

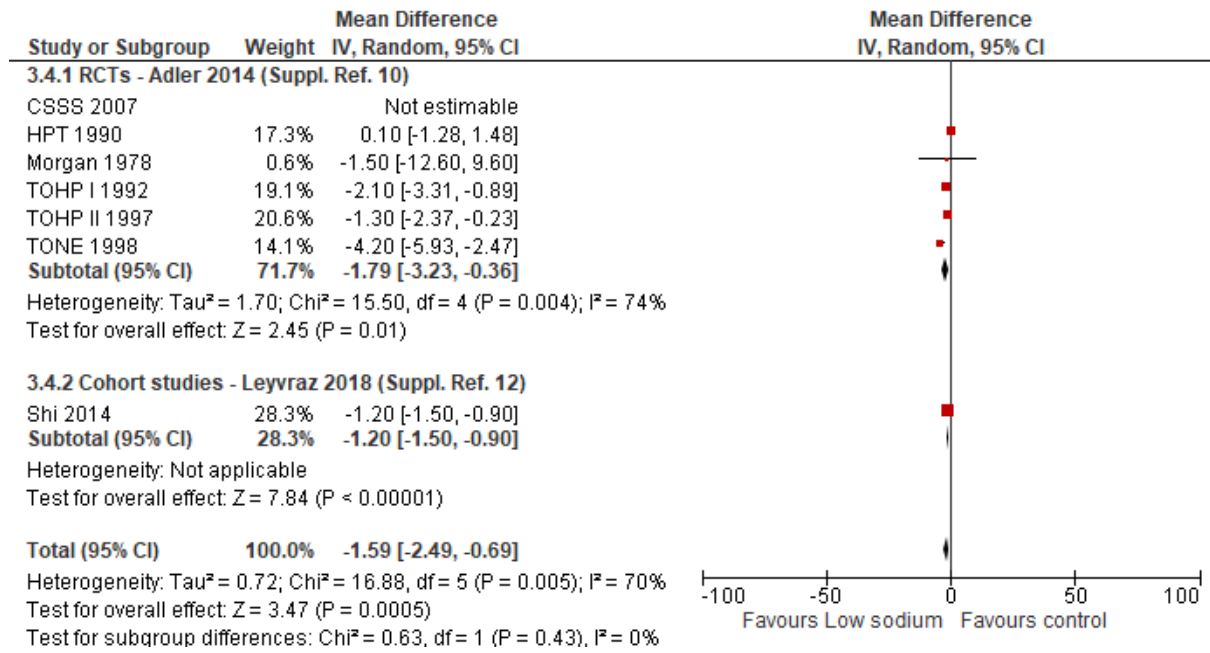

Supplementary Figure 12: Adler et al. 2014 (10) / Leyvraz et al. 2018 (12); Intervention/ Exposure: Low sodium; Outcome: Systolic blood pressure (mmHG)

Supplemental data

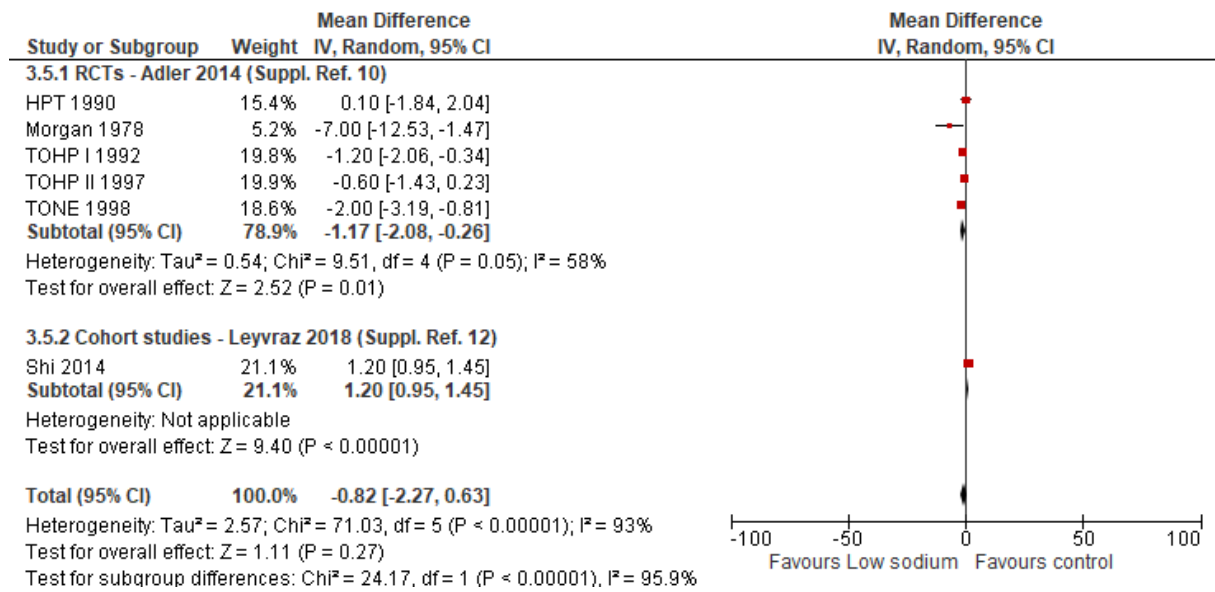

Supplementary Figure 13: Adler et al. 2014 (10) / Leyvraz et al. 2018(12); Intervention/ Exposure: Low sodium; Outcome: Diastolic blood pressure (mmHG)

Supplemental data

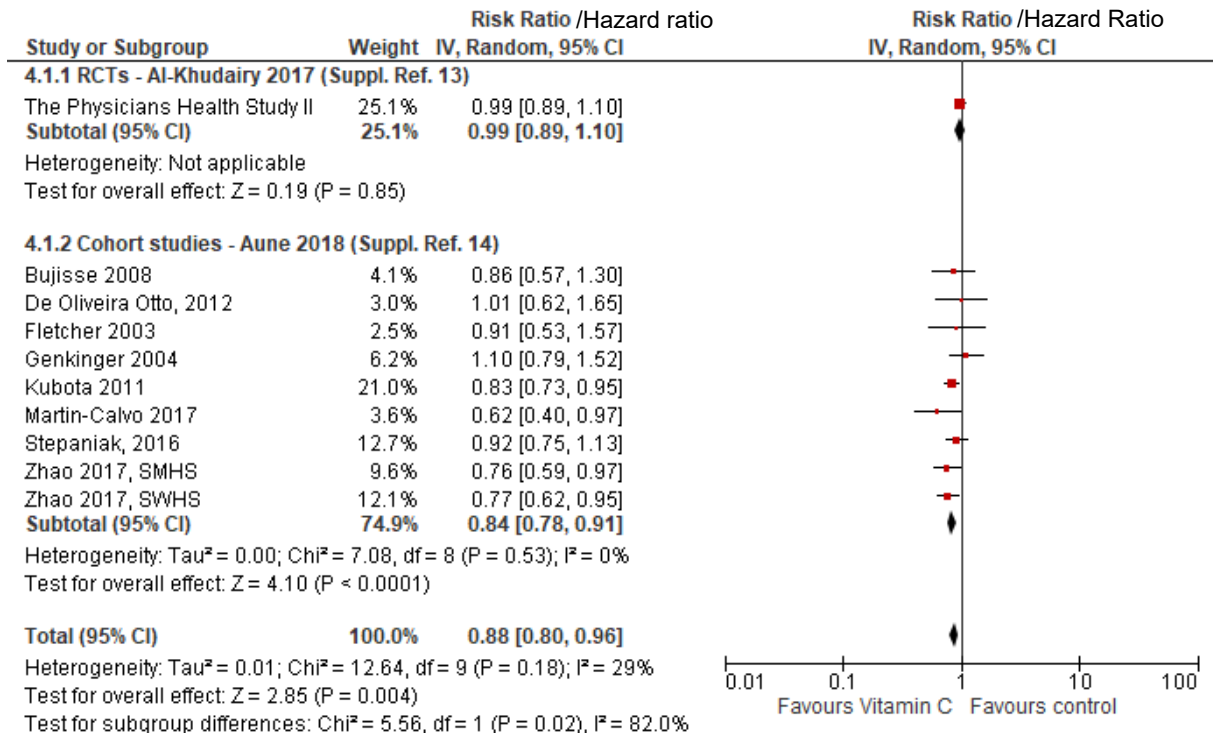

Supplementary Figure 14: Al-Khudairy et al. 2017 (13) / Aune et al. 2018 (14); Intervention/ Exposure: Vitamin C; Outcome: Major cardiovascular events/ Cardiovascular disease.

Supplemental data

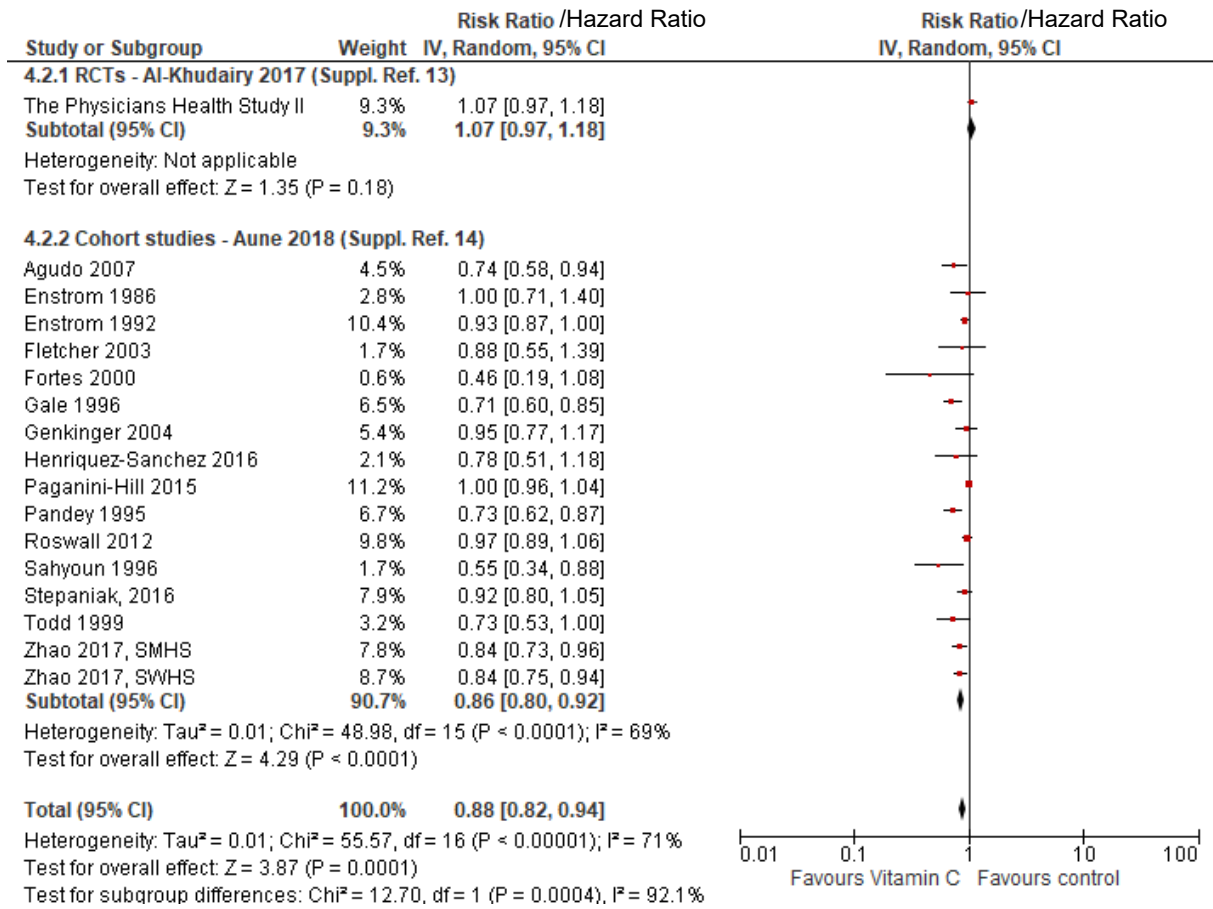

Supplementary Figure 15: Al-Khudairy et al. 2017 (13) / Aune et al. 2018 (14); Intervention/  
Exposure: Vitamin C; Outcome: All-cause mortality

Supplemental data

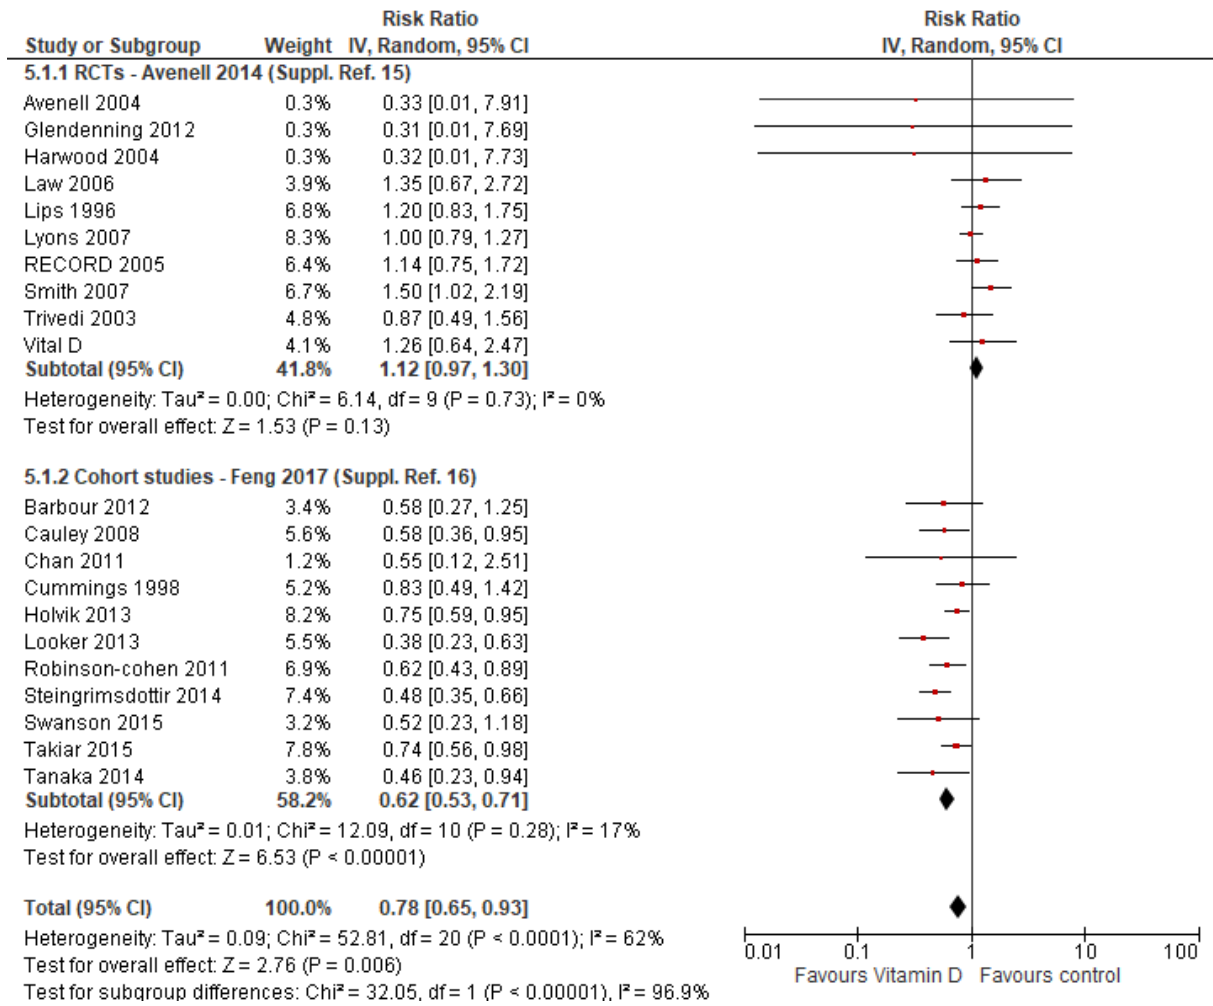

Supplementary Figure 16: Avenell et al. 2014 (15) / Feng et al. 2017 (16); Intervention/ Exposure: Vitamin D; Outcome: Hip fracture

Supplemental data

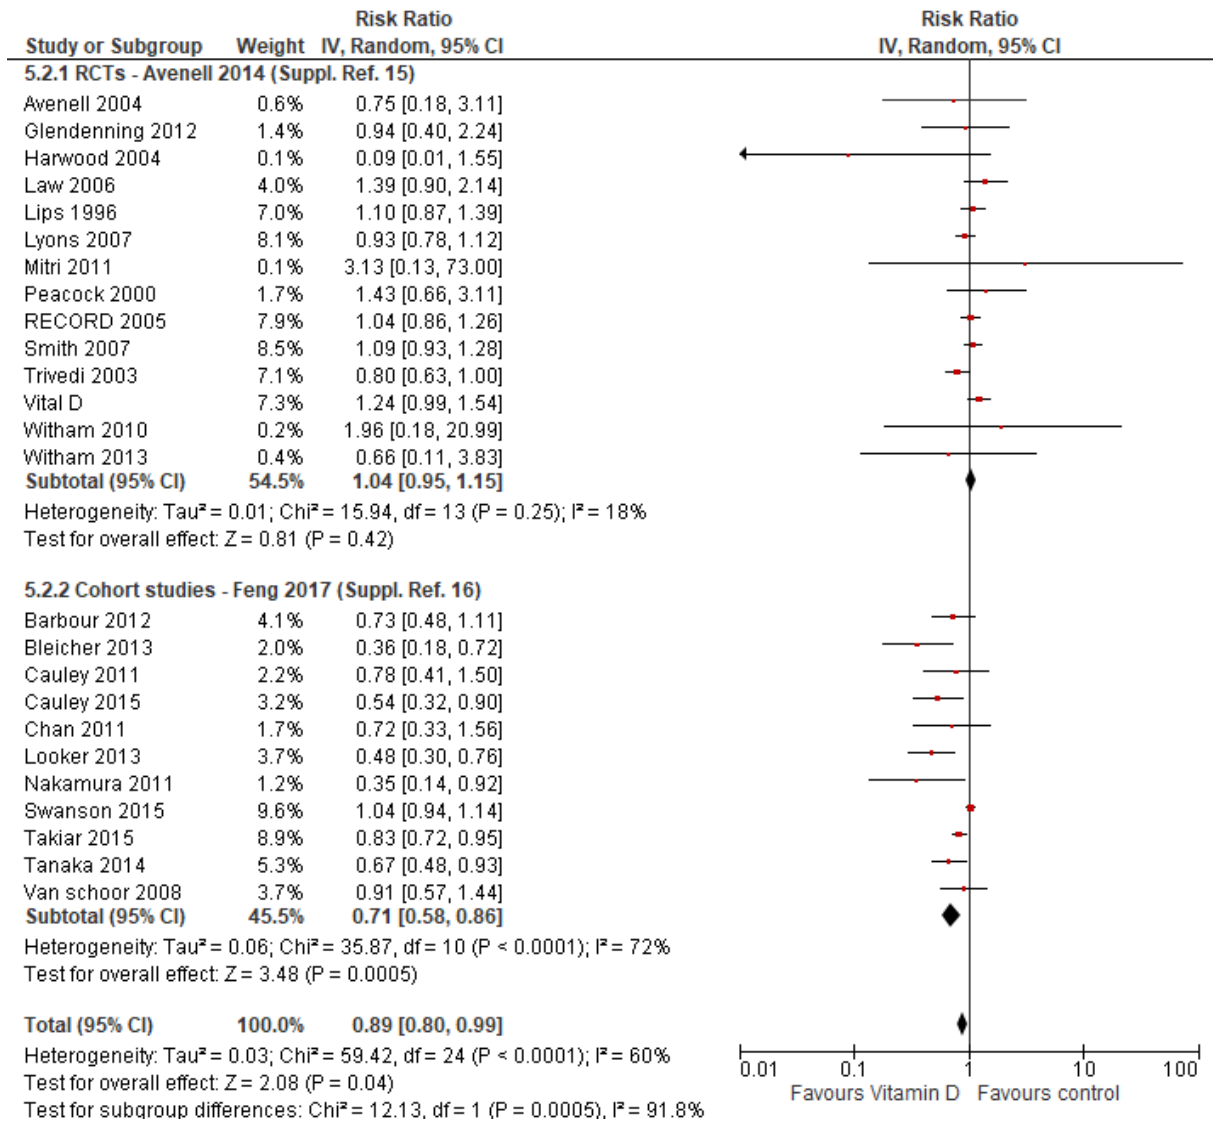

Supplementary Figure 17: Avenell et al. 2014 (15) / Feng et al. 2017 (16); Intervention/ Exposure: Vitamin D; Outcome: Any fracture

Supplemental data

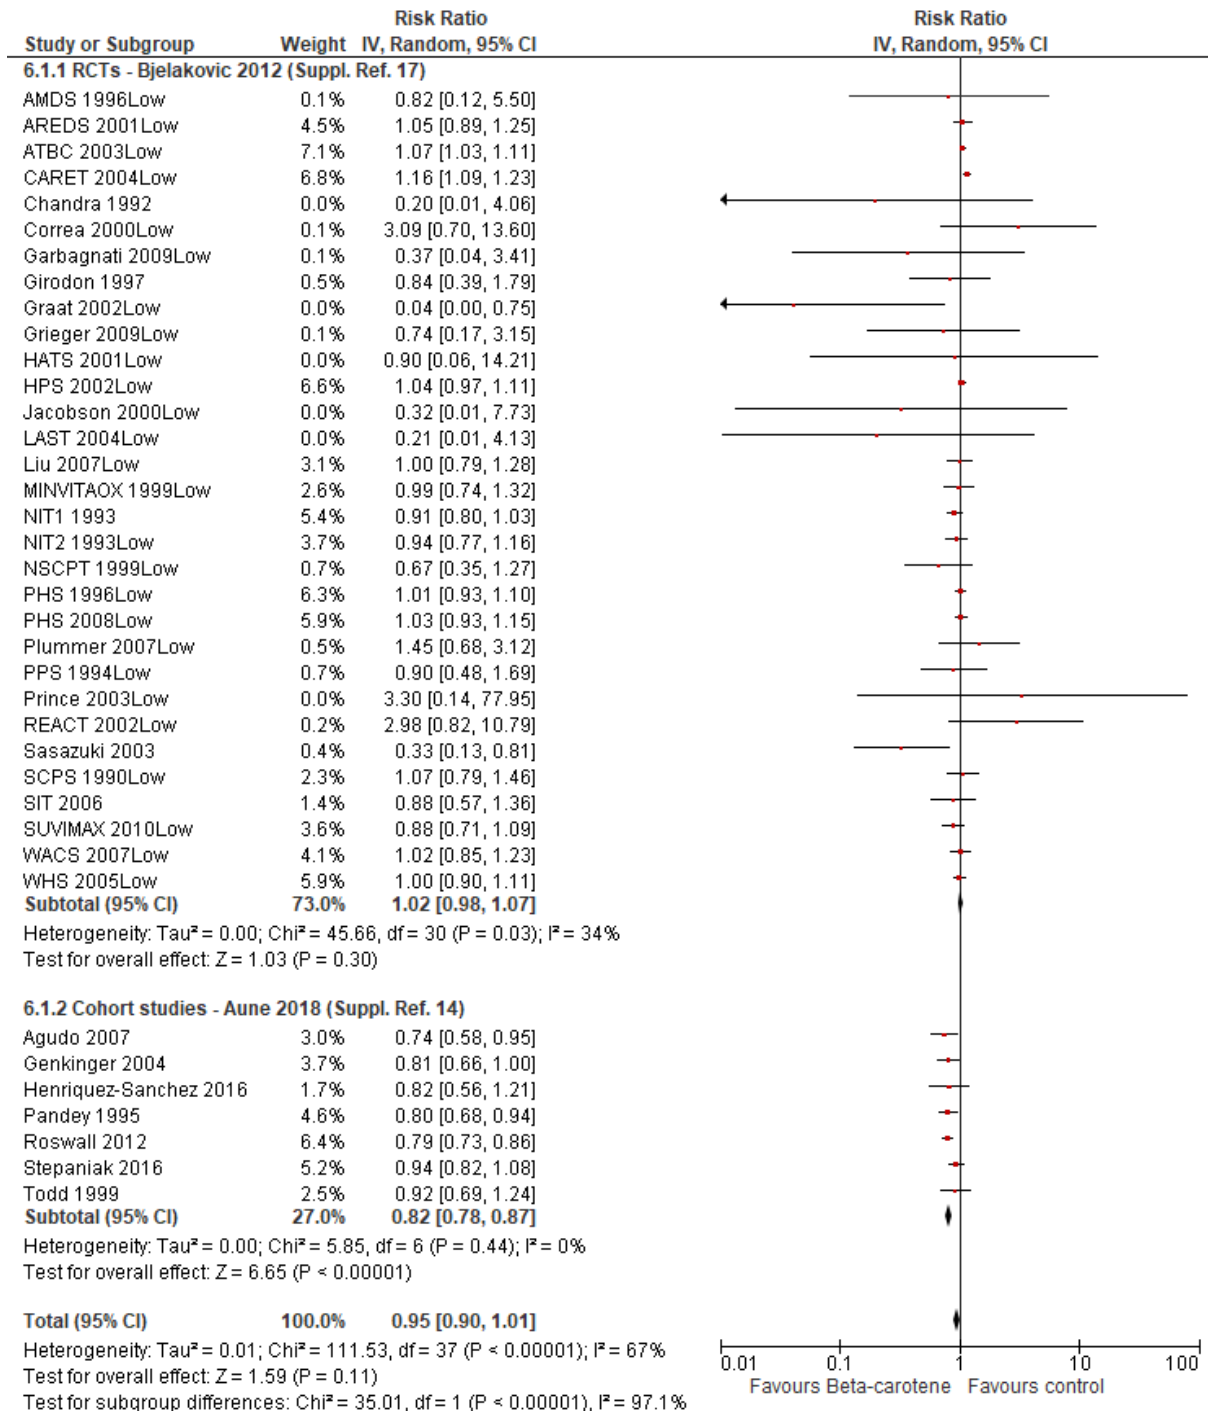

Supplementary Figure 18: Bjelakovic et al. 2012 (17) / Aune et al. 2018 (14); Intervention/ Exposure:  $\beta$ -carotene; Outcome: All-cause mortality



Supplemental data

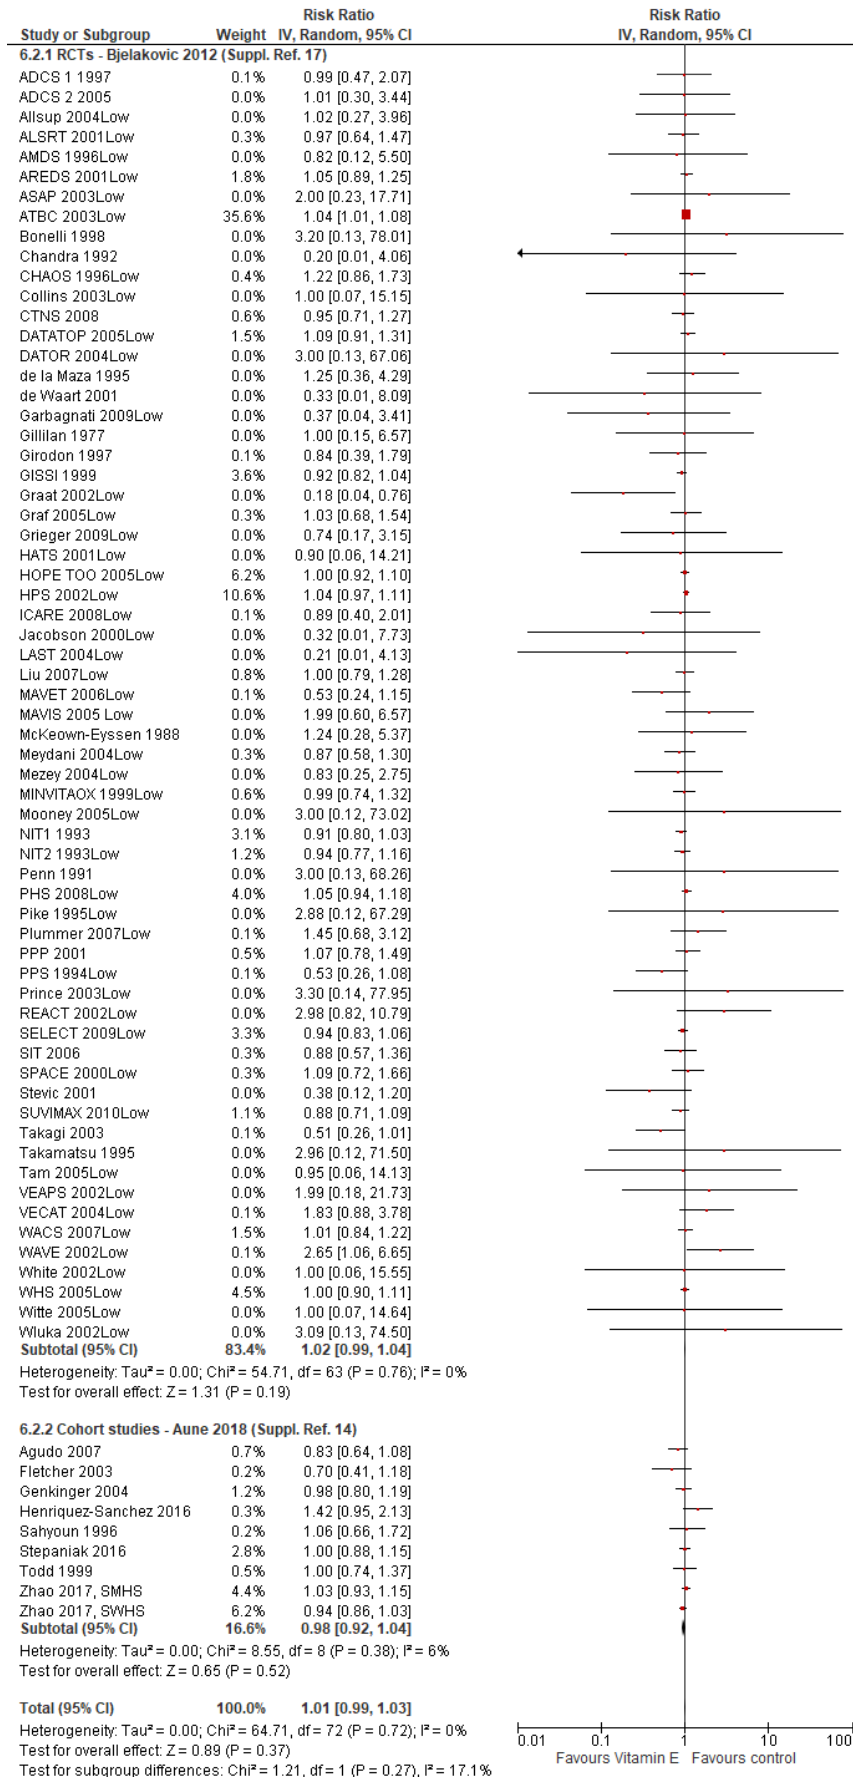

Supplementary Figure 19: Bjelakovic et al. 2012 (17) / Aune et al. 2018 (14); Intervention/ Exposure: Vitamin E; Outcome: All-cause mortality

Supplemental data

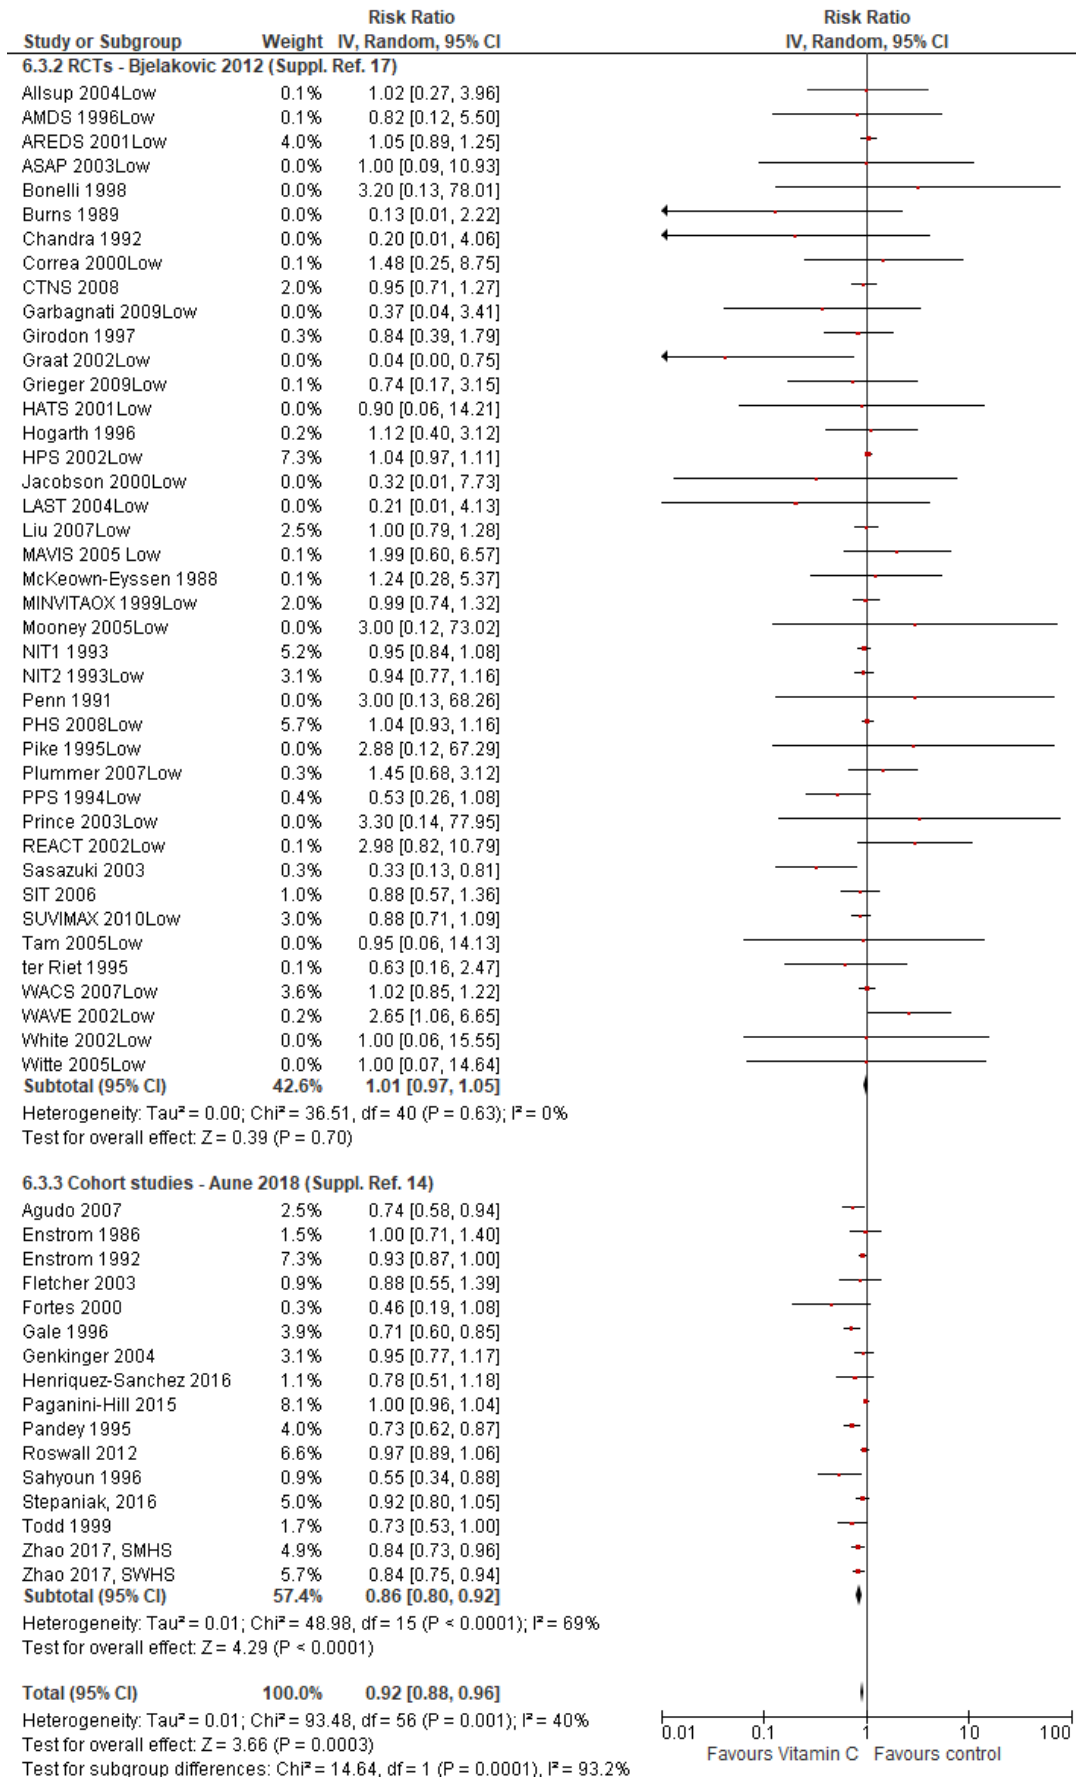

Supplementary Figure 20: Bjelakovic et al. 2012 (17) / Aune et al. 2018 (14); Intervention/ Exposure: Vitamin C; Outcome: All-cause mortality

Supplemental data

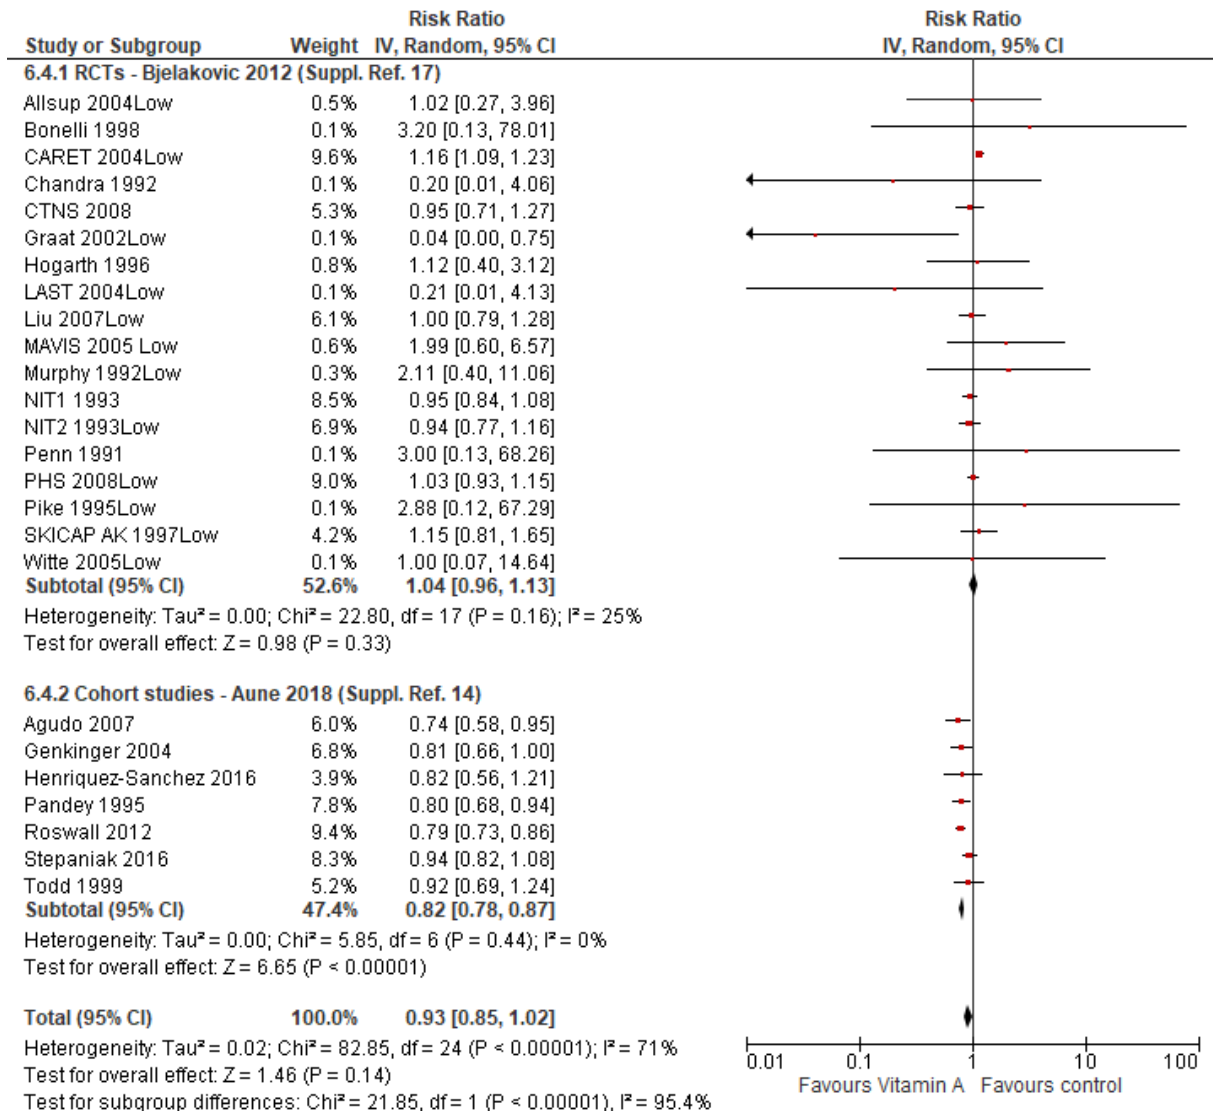

Supplementary Figure 21: Bjelakovic et al. 2012 (17) / Aune et al. 2018 (14); Intervention/ Exposure: Vitamin A/  $\beta$ -carotene; Outcome: All-cause mortality

Supplemental data

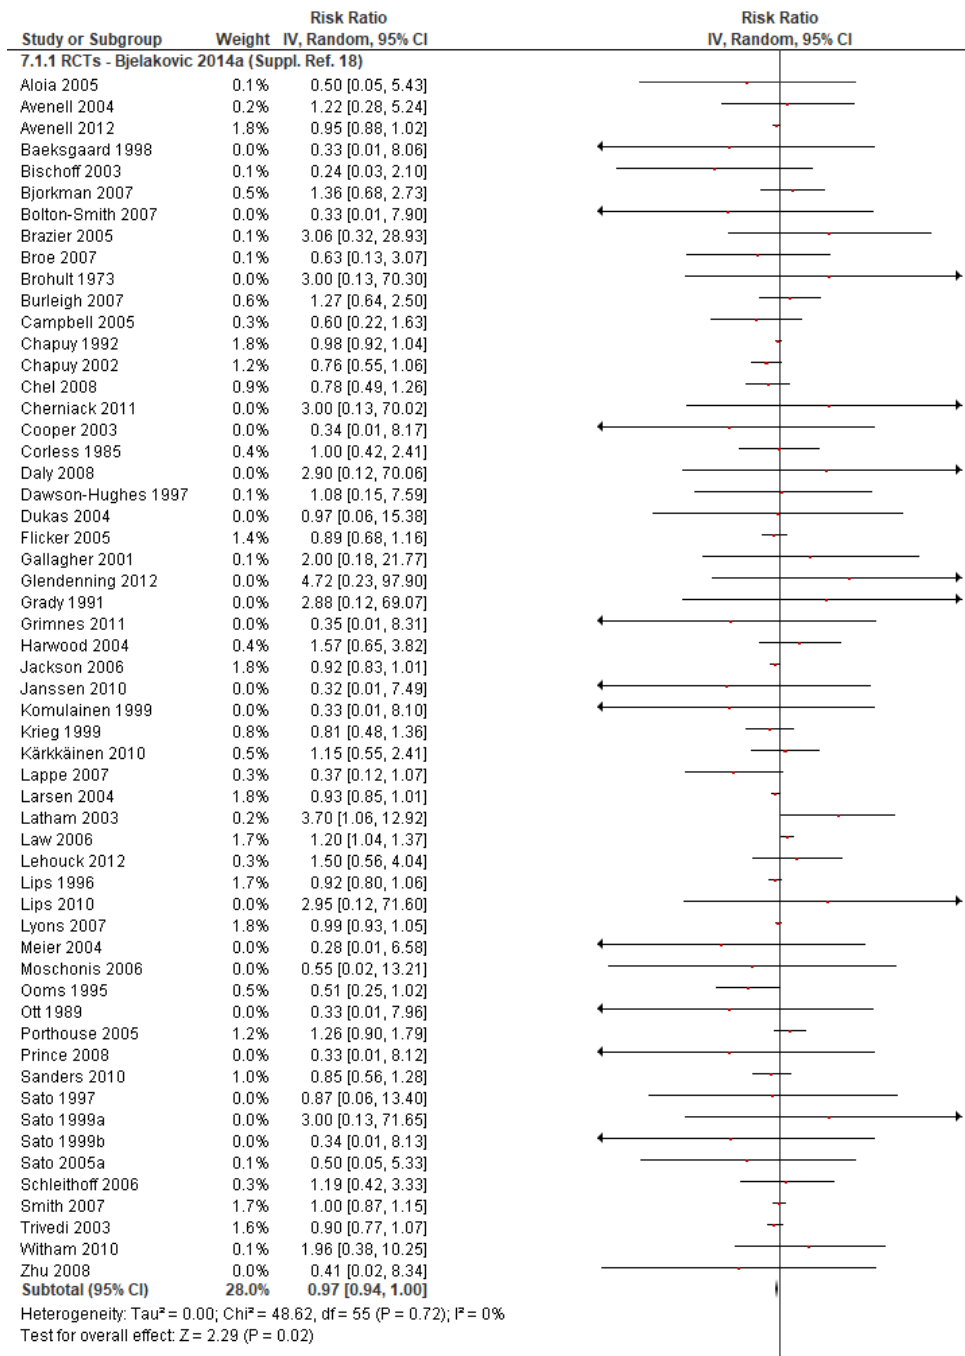

Supplementary Figure 22a (Subtotal RCTs): Bjelakovic et al. 2014a (18); Intervention: Vitamin D; Outcome: All-cause mortality

Supplemental data

7.1.2 Cohort studies - Chowdhury 2014b (Suppl. Ref. 19)

|                          |              |                          |
|--------------------------|--------------|--------------------------|
| 4D                       | 1.0%         | 0.51 [0.34, 0.77]        |
| Amiens                   | 0.3%         | 0.30 [0.11, 0.82]        |
| ArMORR                   | 1.2%         | 0.69 [0.49, 0.97]        |
| ARNOS                    | 1.0%         | 0.65 [0.42, 1.00]        |
| ARRA-RACS                | 0.7%         | 0.43 [0.24, 0.76]        |
| Auckland                 | 1.2%         | 1.08 [0.77, 1.52]        |
| CCHS                     | 1.8%         | 0.78 [0.74, 0.83]        |
| CHS-Israel               | 1.8%         | 0.55 [0.53, 0.58]        |
| CHS-US                   | 1.7%         | 0.83 [0.71, 0.96]        |
| Cleveland                | 1.2%         | 0.65 [0.46, 0.91]        |
| COACH                    | 1.1%         | 0.69 [0.47, 1.01]        |
| CopD                     | 0.4%         | 0.58 [0.26, 1.30]        |
| Copenhagen               | 1.7%         | 0.69 [0.61, 0.79]        |
| DOPS                     | 0.9%         | 0.81 [0.51, 1.27]        |
| EPIC                     | 1.5%         | 0.73 [0.59, 0.91]        |
| ESTHER                   | 1.8%         | 0.96 [0.89, 1.03]        |
| Goodwin                  | 0.9%         | 0.66 [0.42, 1.04]        |
| Gracia-Iguacel           | 0.1%         | 0.07 [0.01, 0.61]        |
| Gugatschka               | 1.6%         | 0.78 [0.66, 0.92]        |
| Heal                     | 0.8%         | 0.69 [0.41, 1.17]        |
| Health ABC               | 1.6%         | 0.65 [0.54, 0.79]        |
| Holmgaard                | 0.9%         | 0.84 [0.53, 1.32]        |
| Hoorn                    | 1.1%         | 0.68 [0.46, 1.00]        |
| HOST                     | 1.4%         | 0.88 [0.69, 1.12]        |
| HPFS/ PHS                | 1.5%         | 0.84 [0.69, 1.03]        |
| Hvidore                  | 0.6%         | 0.34 [0.17, 0.66]        |
| InCHIANTI                | 0.9%         | 0.53 [0.33, 0.84]        |
| Intermountain            | 1.8%         | 0.66 [0.61, 0.71]        |
| JANUS                    | 1.3%         | 0.33 [0.25, 0.43]        |
| Jia                      | 0.8%         | 0.65 [0.39, 1.08]        |
| Karola                   | 0.7%         | 1.57 [0.88, 2.78]        |
| KIHD                     | 0.7%         | 0.48 [0.26, 0.89]        |
| Krause                   | 1.7%         | 0.50 [0.45, 0.56]        |
| Kuroda                   | 0.3%         | 0.37 [0.14, 0.98]        |
| LASA                     | 1.4%         | 0.76 [0.58, 0.98]        |
| Linxian                  | 1.6%         | 1.06 [0.90, 1.25]        |
| LMC                      | 0.8%         | 0.60 [0.35, 1.03]        |
| LURIC                    | 1.5%         | 0.53 [0.43, 0.67]        |
| MARIE                    | 1.0%         | 0.65 [0.42, 1.00]        |
| Mezawa                   | 0.6%         | 0.82 [0.42, 1.58]        |
| MIDSPAN                  | 0.6%         | 0.52 [0.28, 0.97]        |
| MINOS                    | 1.0%         | 0.65 [0.43, 0.98]        |
| MONICA/ INTER99          | 1.5%         | 0.76 [0.62, 0.94]        |
| MrOS                     | 1.3%         | 1.04 [0.78, 1.39]        |
| NDNS                     | 1.6%         | 0.78 [0.64, 0.94]        |
| NECOSAD                  | 0.9%         | 0.67 [0.43, 1.04]        |
| NHANES 2001-4            | 1.1%         | 0.75 [0.52, 1.09]        |
| NHANES III               | 1.7%         | 0.82 [0.72, 0.93]        |
| NSCLC                    | 1.2%         | 0.77 [0.55, 1.08]        |
| Pardisani                | 1.4%         | 0.88 [0.70, 1.12]        |
| Pecovnik-Balon           | 0.4%         | 0.48 [0.21, 1.10]        |
| Quebec                   | 1.1%         | 0.87 [0.61, 1.23]        |
| Ravani                   | 0.6%         | 0.50 [0.25, 1.00]        |
| SCCS                     | 1.5%         | 0.60 [0.49, 0.74]        |
| SOF                      | 0.7%         | 0.87 [0.50, 1.53]        |
| SPORE                    | 0.6%         | 0.39 [0.21, 0.72]        |
| SPORE (2)                | 0.4%         | 0.32 [0.13, 0.78]        |
| STENO                    | 0.3%         | 0.31 [0.11, 0.90]        |
| TNT                      | 1.0%         | 0.94 [0.62, 1.41]        |
| Tromso Heart             | 1.7%         | 0.87 [0.75, 1.00]        |
| ULSAM                    | 1.0%         | 0.55 [0.37, 0.82]        |
| VADT                     | 0.7%         | 0.97 [0.54, 1.72]        |
| Wang                     | 0.2%         | 1.14 [0.32, 4.09]        |
| WHAS                     | 0.6%         | 0.46 [0.24, 0.91]        |
| WHI                      | 1.1%         | 0.83 [0.56, 1.21]        |
| Whitehall                | 1.7%         | 0.79 [0.70, 0.89]        |
| Yamato                   | 0.6%         | 0.91 [0.47, 1.75]        |
| Zittermann               | 0.5%         | 0.75 [0.36, 1.56]        |
| <b>Subtotal (95% CI)</b> | <b>72.0%</b> | <b>0.70 [0.65, 0.75]</b> |

Heterogeneity: Tau<sup>2</sup> = 0.05; Chi<sup>2</sup> = 387.75, df = 67 (P < 0.00001); I<sup>2</sup> = 83%  
 Test for overall effect: Z = 10.08 (P < 0.00001)

Total (95% CI) 100.0% 0.76 [0.72, 0.81]

Heterogeneity: Tau<sup>2</sup> = 0.05; Chi<sup>2</sup> = 749.23, df = 123 (P < 0.00001); I<sup>2</sup> = 84%  
 Test for overall effect: Z = 8.57 (P < 0.00001)

Test for subgroup differences: Chi<sup>2</sup> = 70.80, df = 1 (P < 0.00001), I<sup>2</sup> = 98.6%

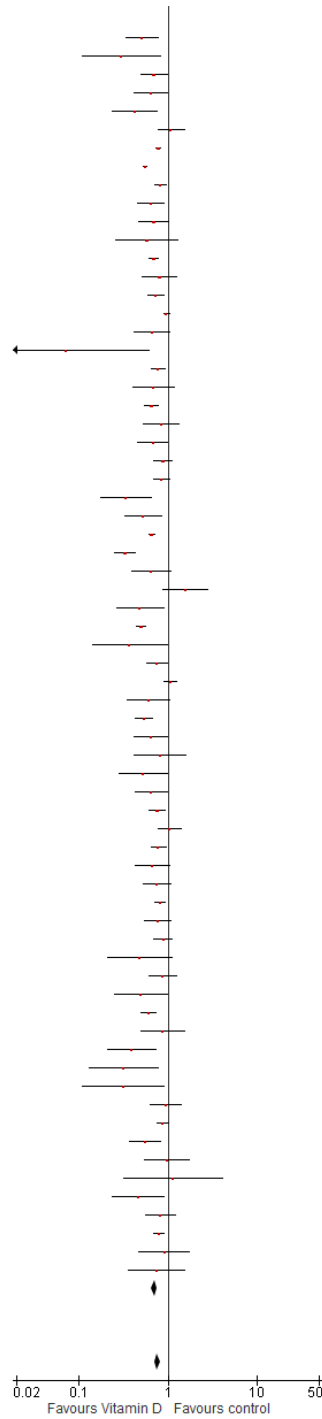

Supplementary Figure 22b (Subtotal Cohort studies / Total): Chowdhury et al. 2014b (19); Exposure: Vitamin D; Outcome: All-cause mortality

Supplemental data

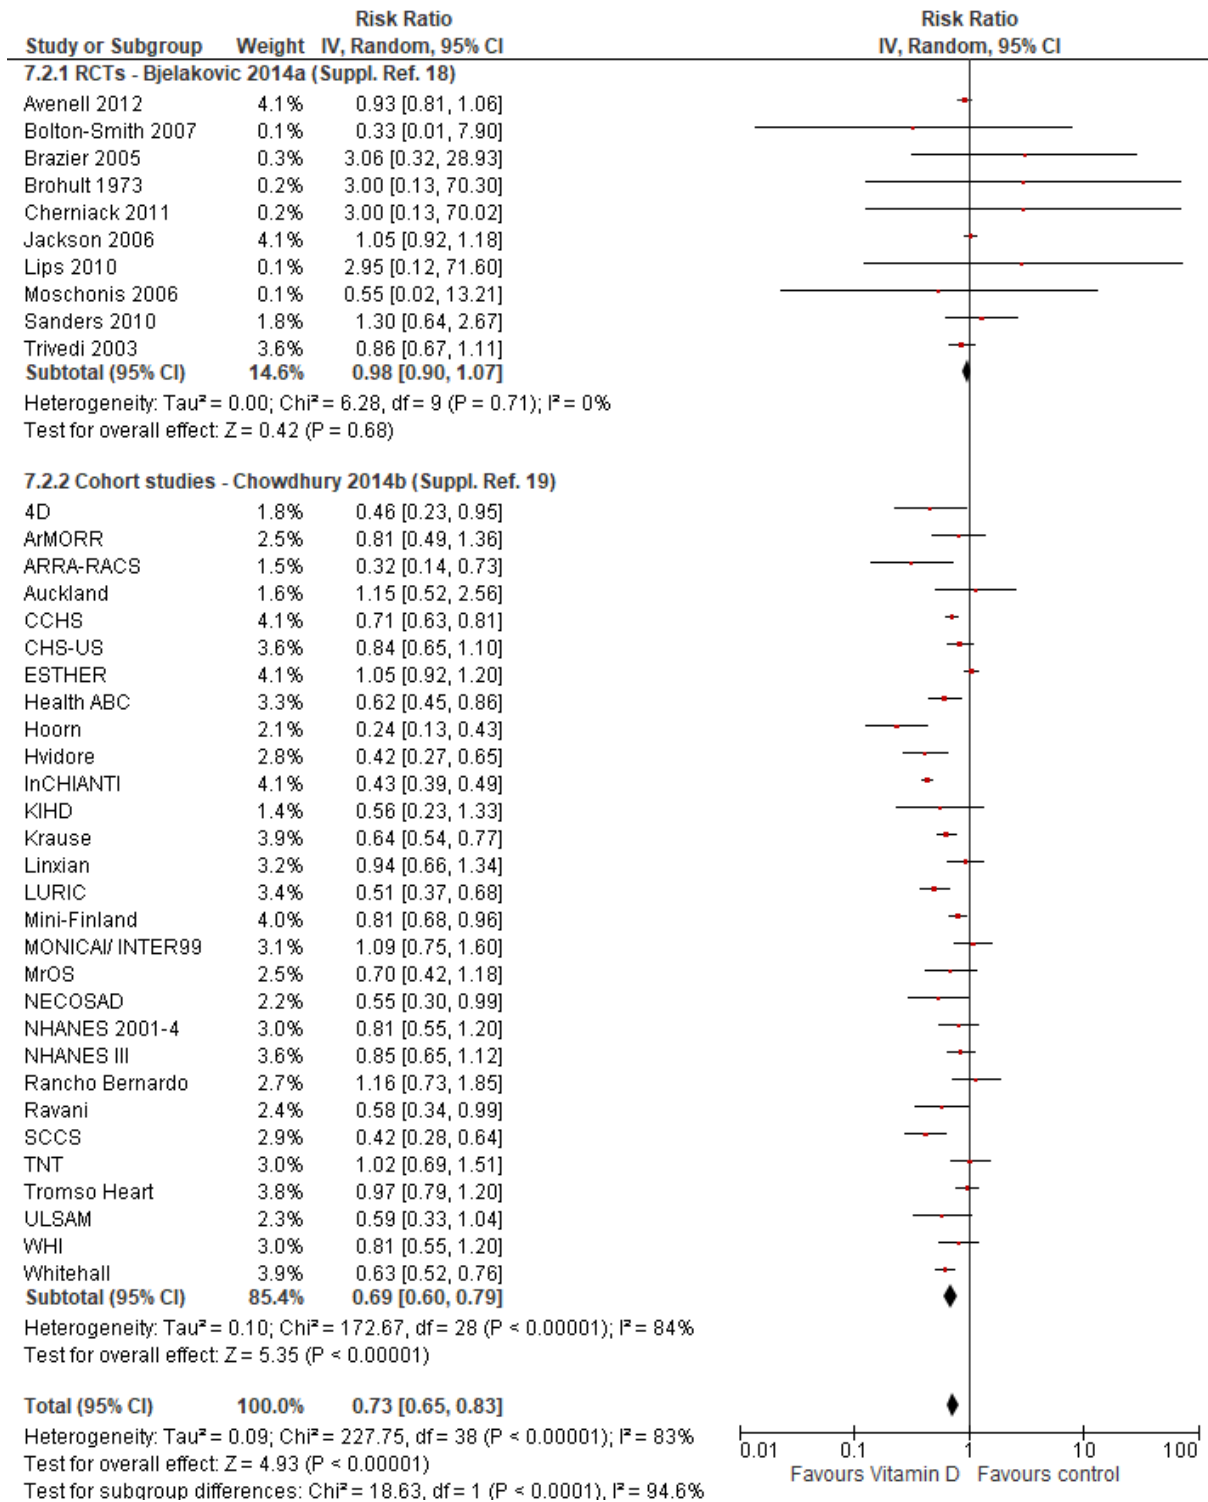

Supplementary Figure 23: Bjelakovic et al. 2014a (18) / Chowdhury et al. 2014b (19); Intervention/ Exposure: Vitamin D; Outcome: Cardiovascular mortality

Supplemental data

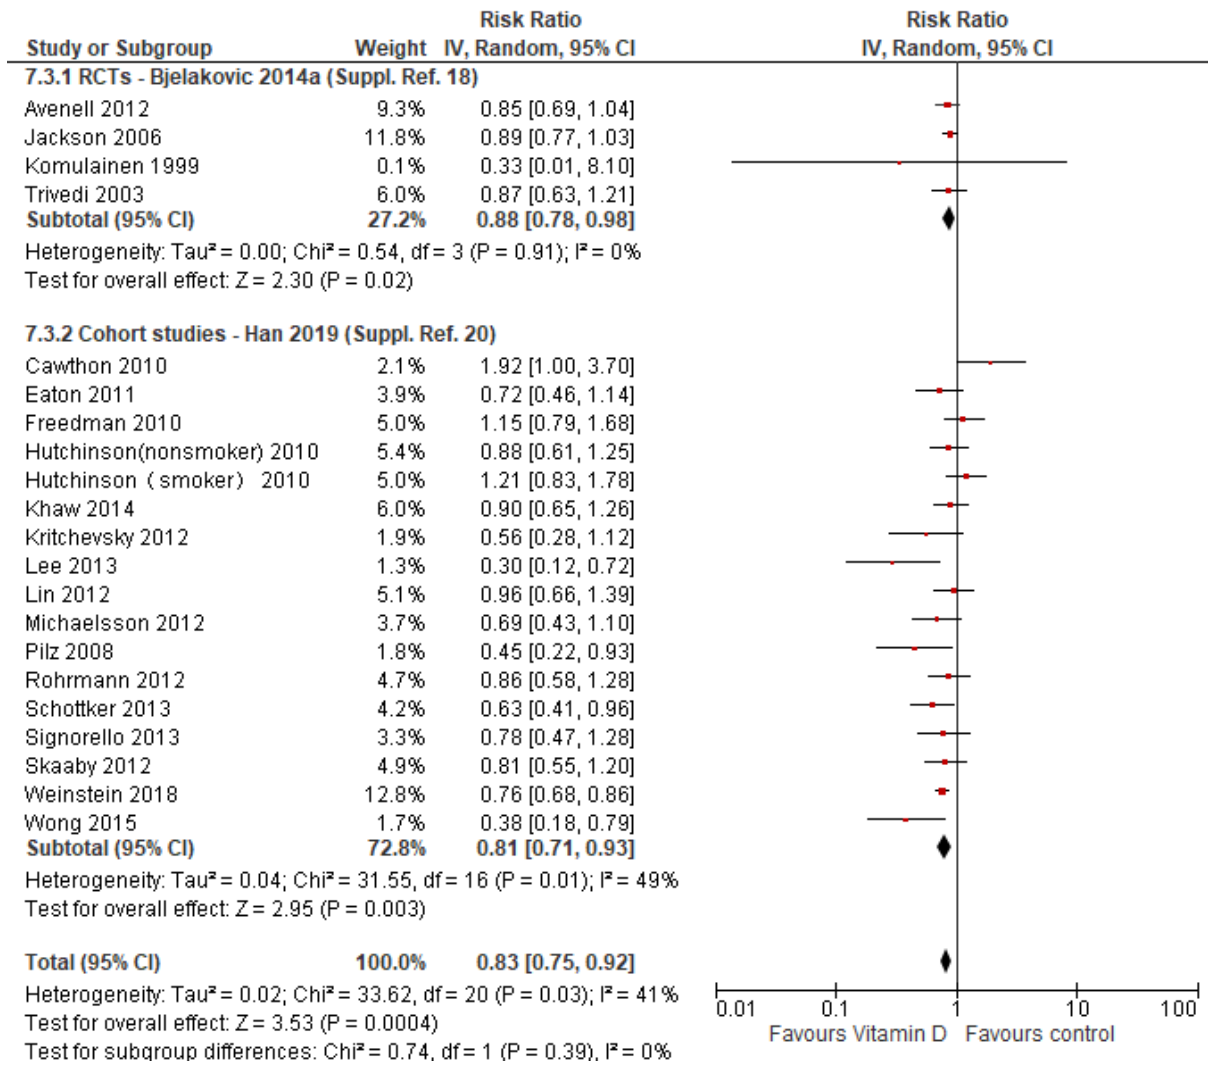

Supplementary Figure 24: Bjelakovic et al. 2014a (18) / Han et al. 2019 (20); Intervention/ Exposure: Vitamin D; Outcome: Cancer mortality

Supplemental data

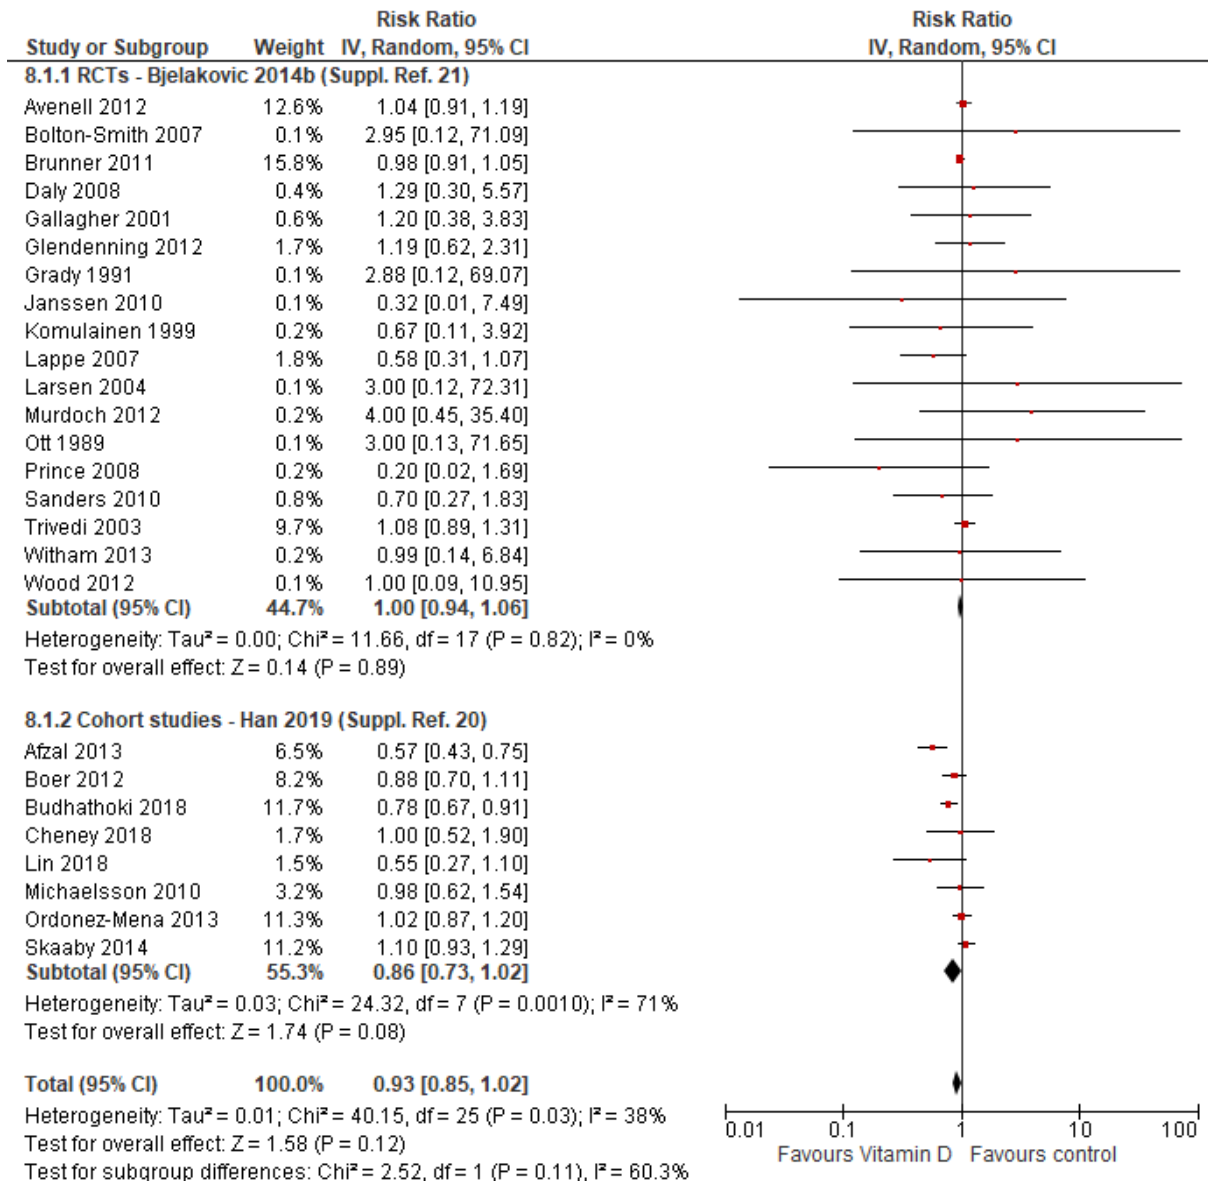

Supplementary Figure 25: Bjelakovic et al. 2014b (21) / Han et al. 2019 (20); Intervention/ Exposure: Vitamin D; Outcome: Cancer occurrence/ Cancer incidence



Supplemental data

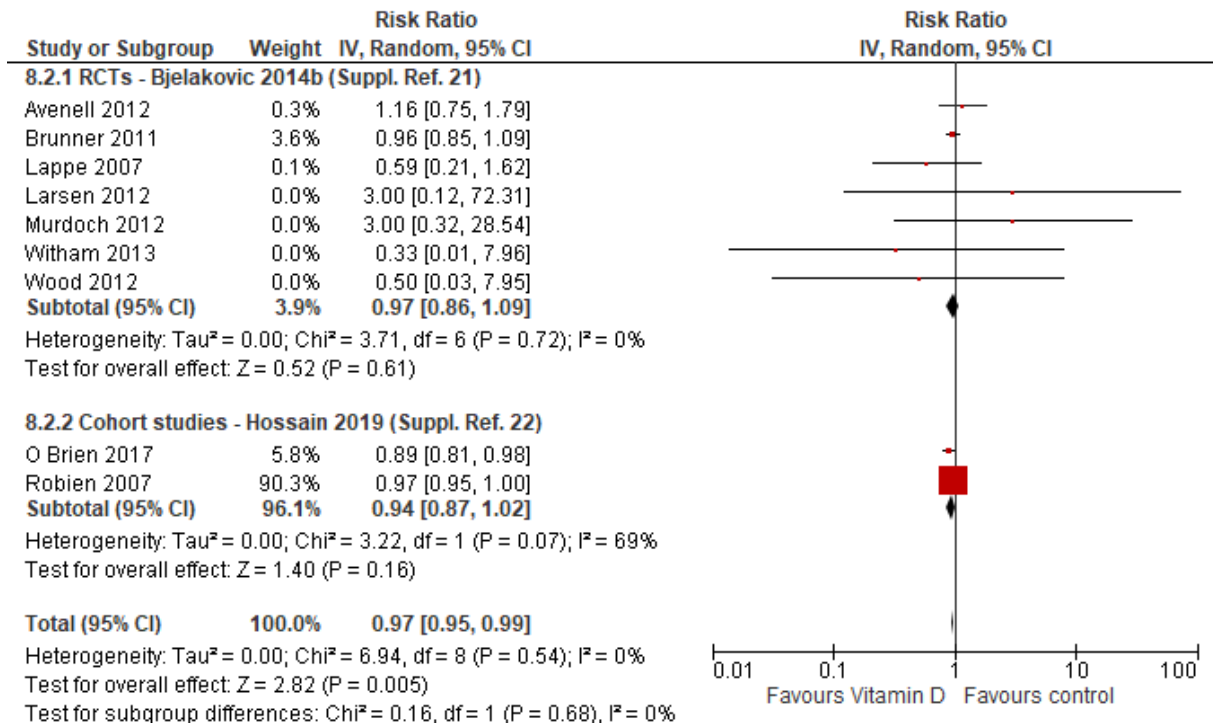

Supplementary Figure 26: Bjelakovic et al. 2014b (21) / Hossain et al. 2019 (22); Intervention/  
Exposure: Vitamin D3/ Vitamin D; Outcome: Breast cancer

Supplemental data

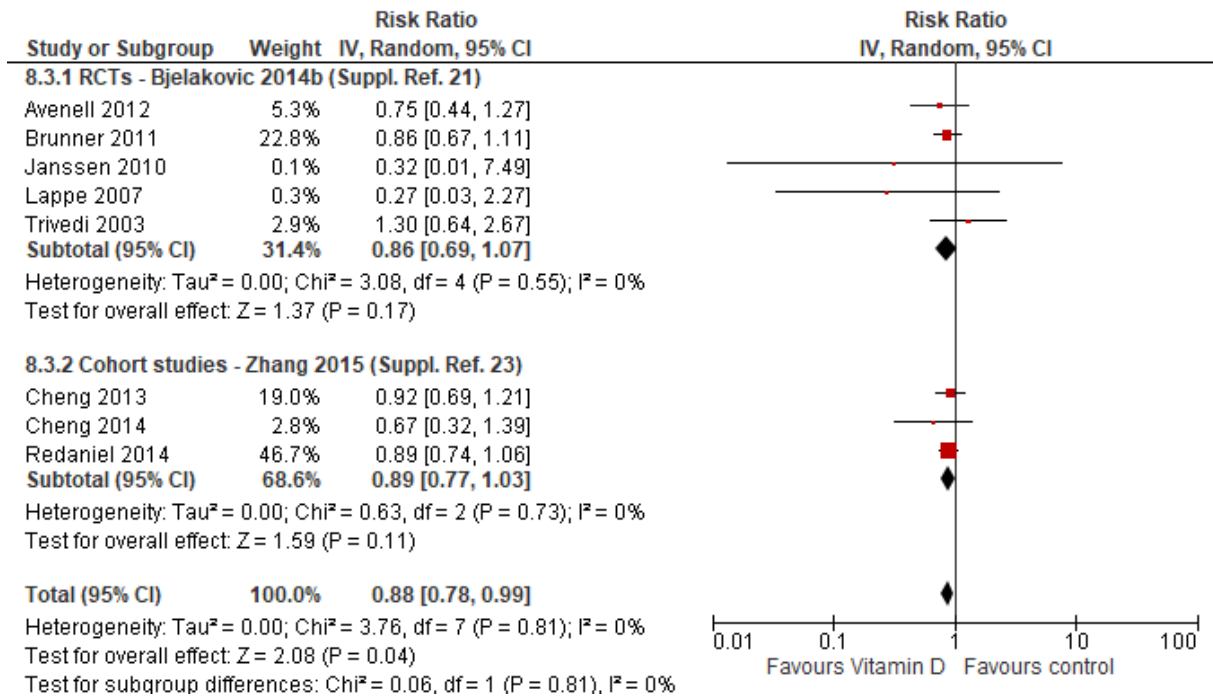

Supplementary Figure 27: Bjelakovic et al. 2014b (21) / Zhang et al. 2015 (23); Intervention/ Exposure: Vitamin D3/ Vitamin D; Outcome: Lung cancer

Supplemental data

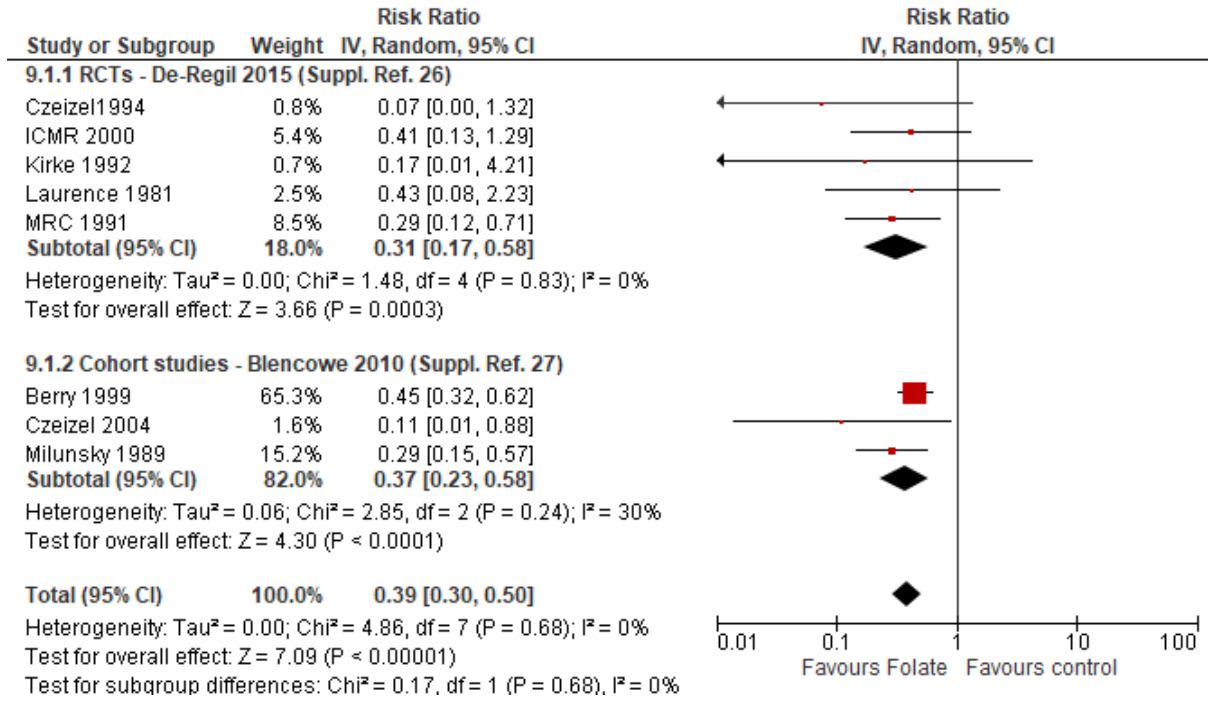

Supplementary Figure 28: De-Regil 2015 (26) / Blencowe et al. 2010 (27); Intervention/ Exposure: Folate; Outcome: Neural tube defect

Supplemental data

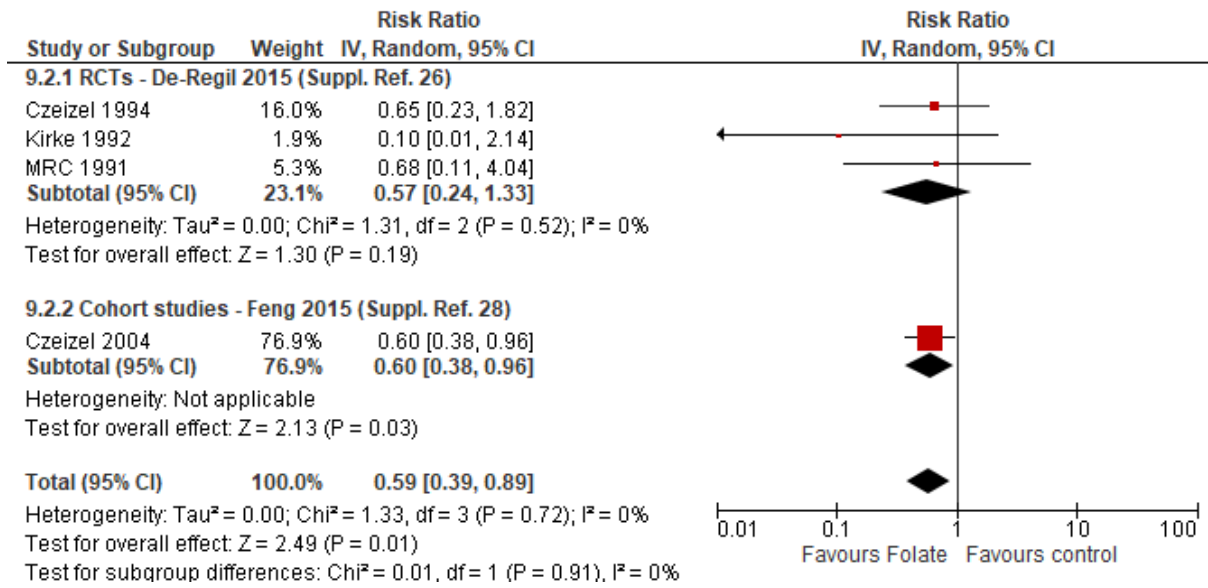

Supplementary Figure 29: De-Regil et al. 2015 (26) / Feng et al. 2015 (28); Intervention/ Exposure: Folate; Outcome: Congenital cardiovascular anomalies/ Congenital heart defect

Supplemental data

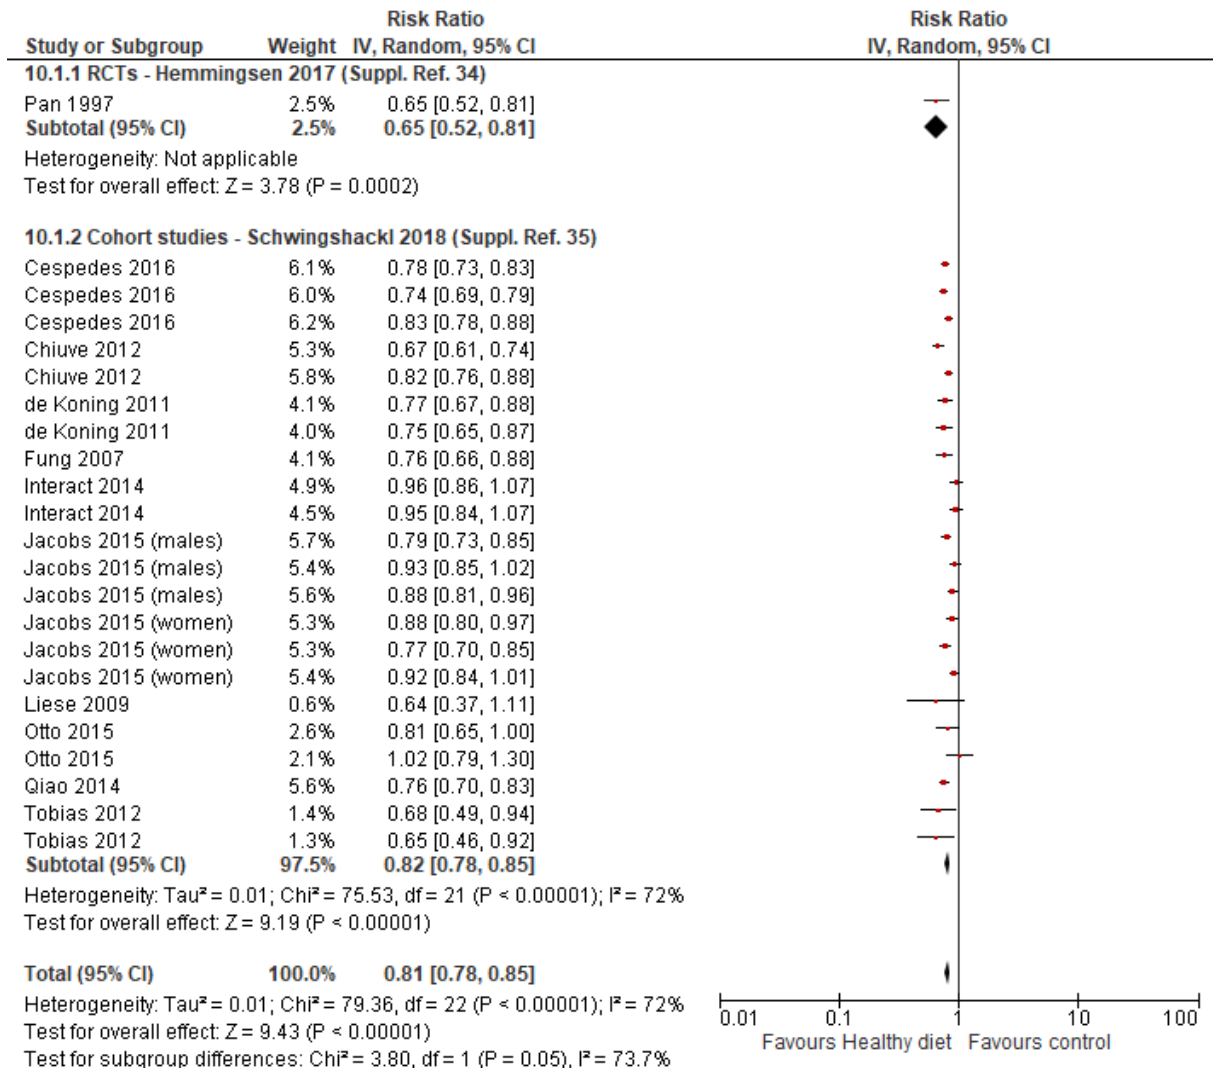

Supplementary Figure 30: Hemmingsen et al. 2017 (34) / Schwingshackl et al. 2018 (35);  
Intervention/ Exposure: Healthy diet/ Diet quality; Outcome: Type 2 diabetes

Supplemental data

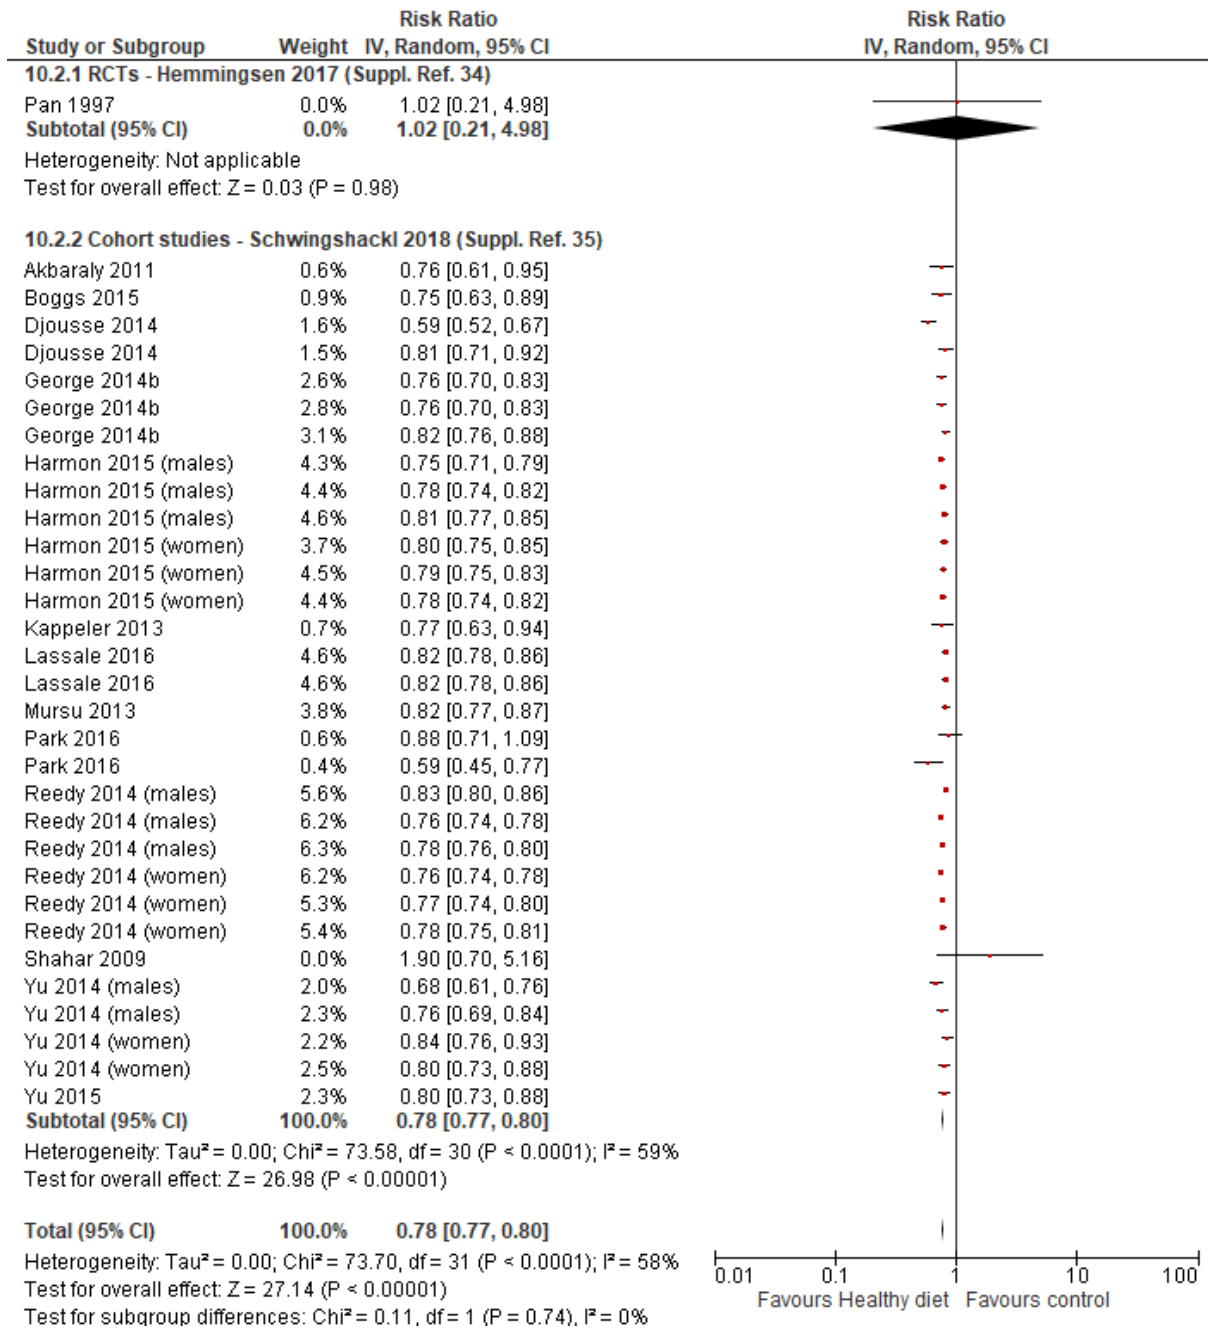

Supplementary Figure 31: Hemmingsen 2017 (34) / Schwingshackl et al. 2018 (35); Intervention/ Exposure: Healthy diet/ Diet quality; Outcome: All-cause mortality

Supplemental data

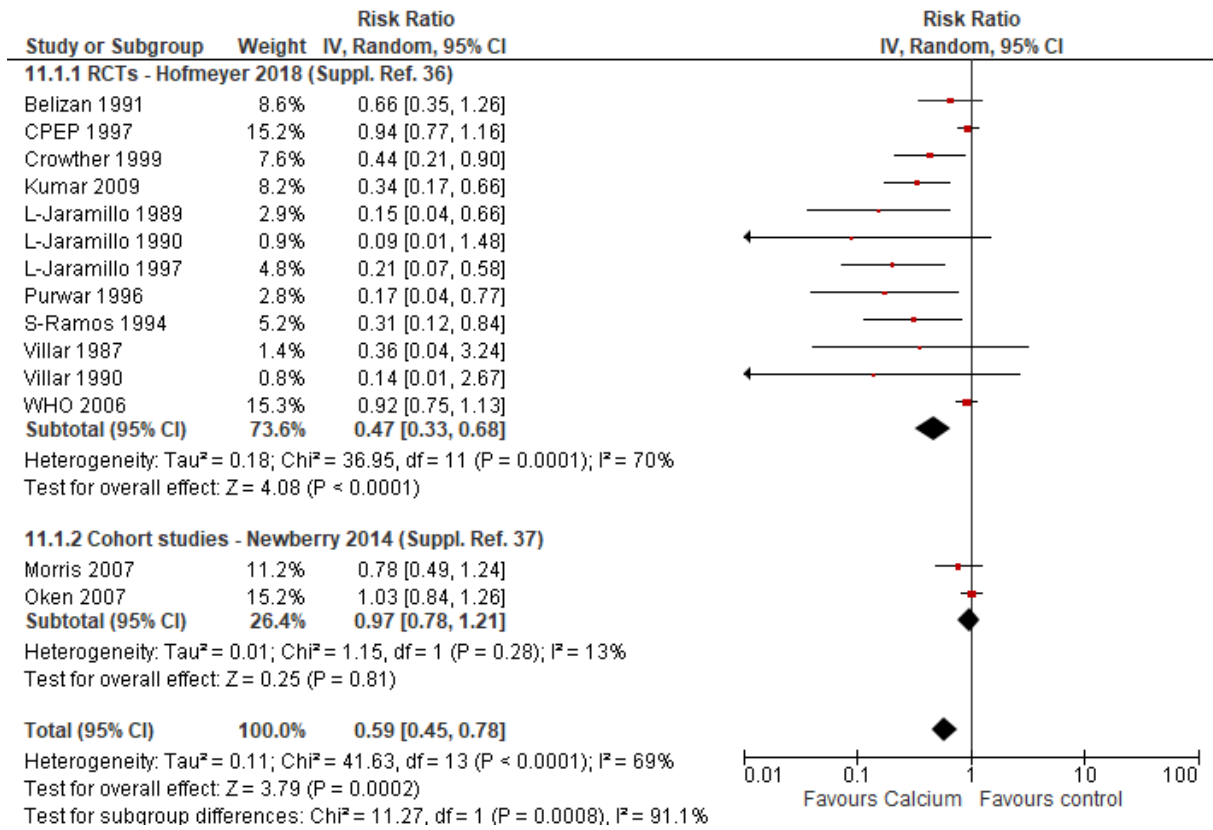

Supplementary Figure 32: Hofmeyer et al. 2018 (36) / Newberry et al. 2014 (37); Intervention/  
Exposure: Calcium; Outcome: Pre-eclampsia

Supplemental data

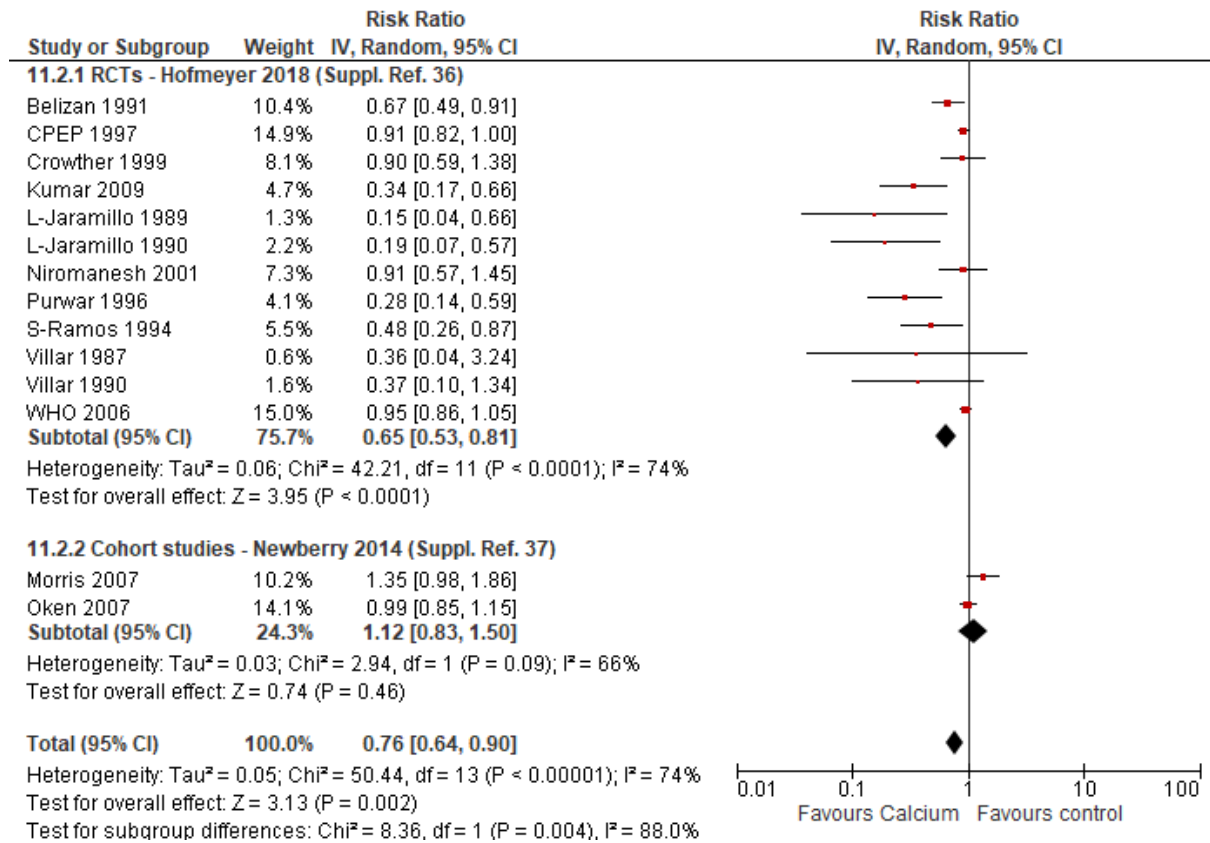

Supplementary Figure 33: Hofmeyer et al. 2018 (36) / Newberry et al. 2014 (37); Intervention/  
Exposure: Calcium; Outcome: High blood pressure



Supplemental data

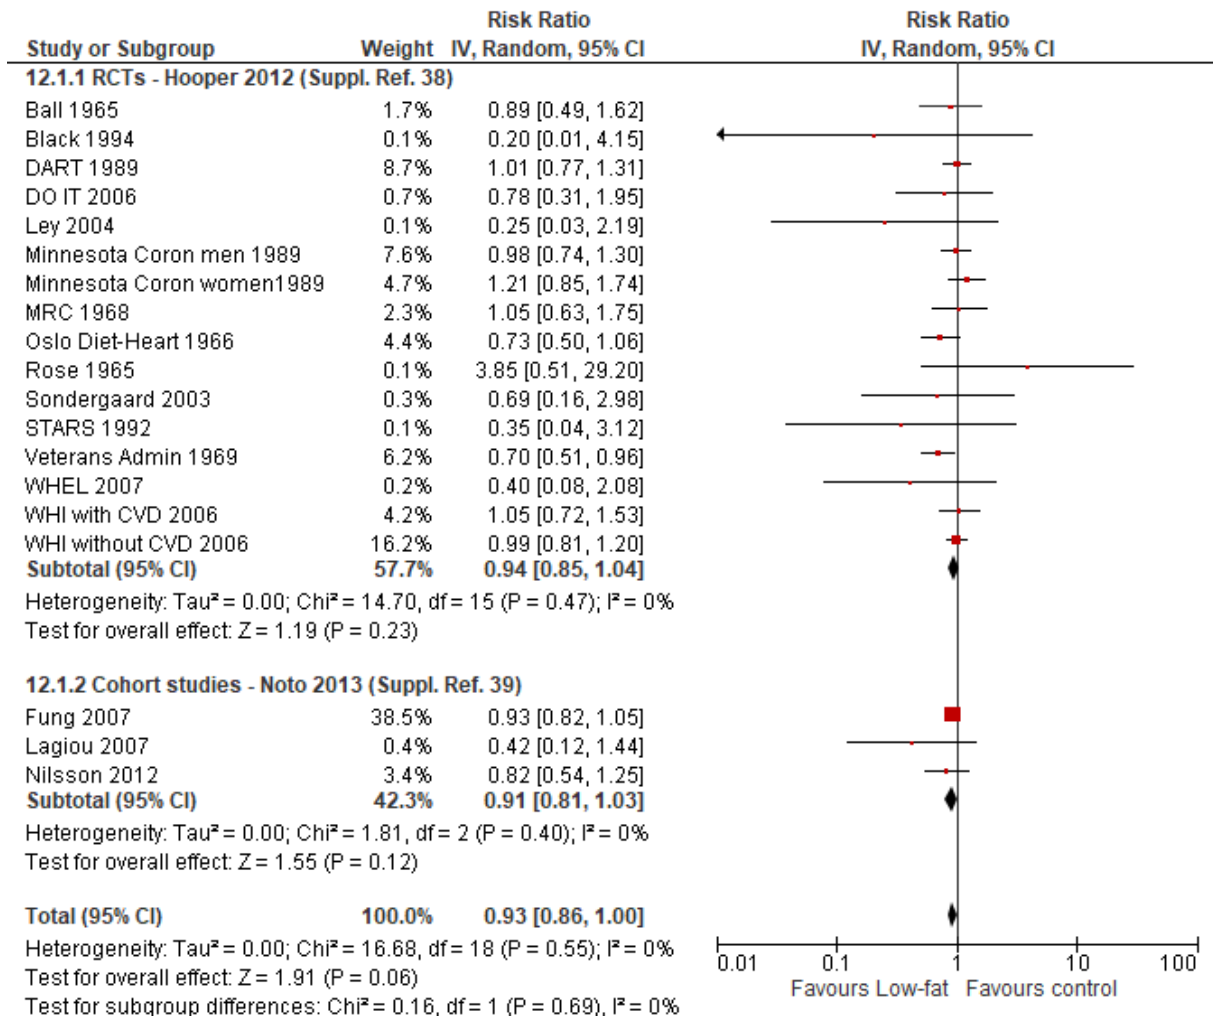

Supplementary Figure 34: Hooper et al. 2012 (38) / Noto et al. 2013 (39); Intervention/ Exposure: Low fat or modified fat/ High carb; Outcome: Cardiovascular mortality

Supplemental data

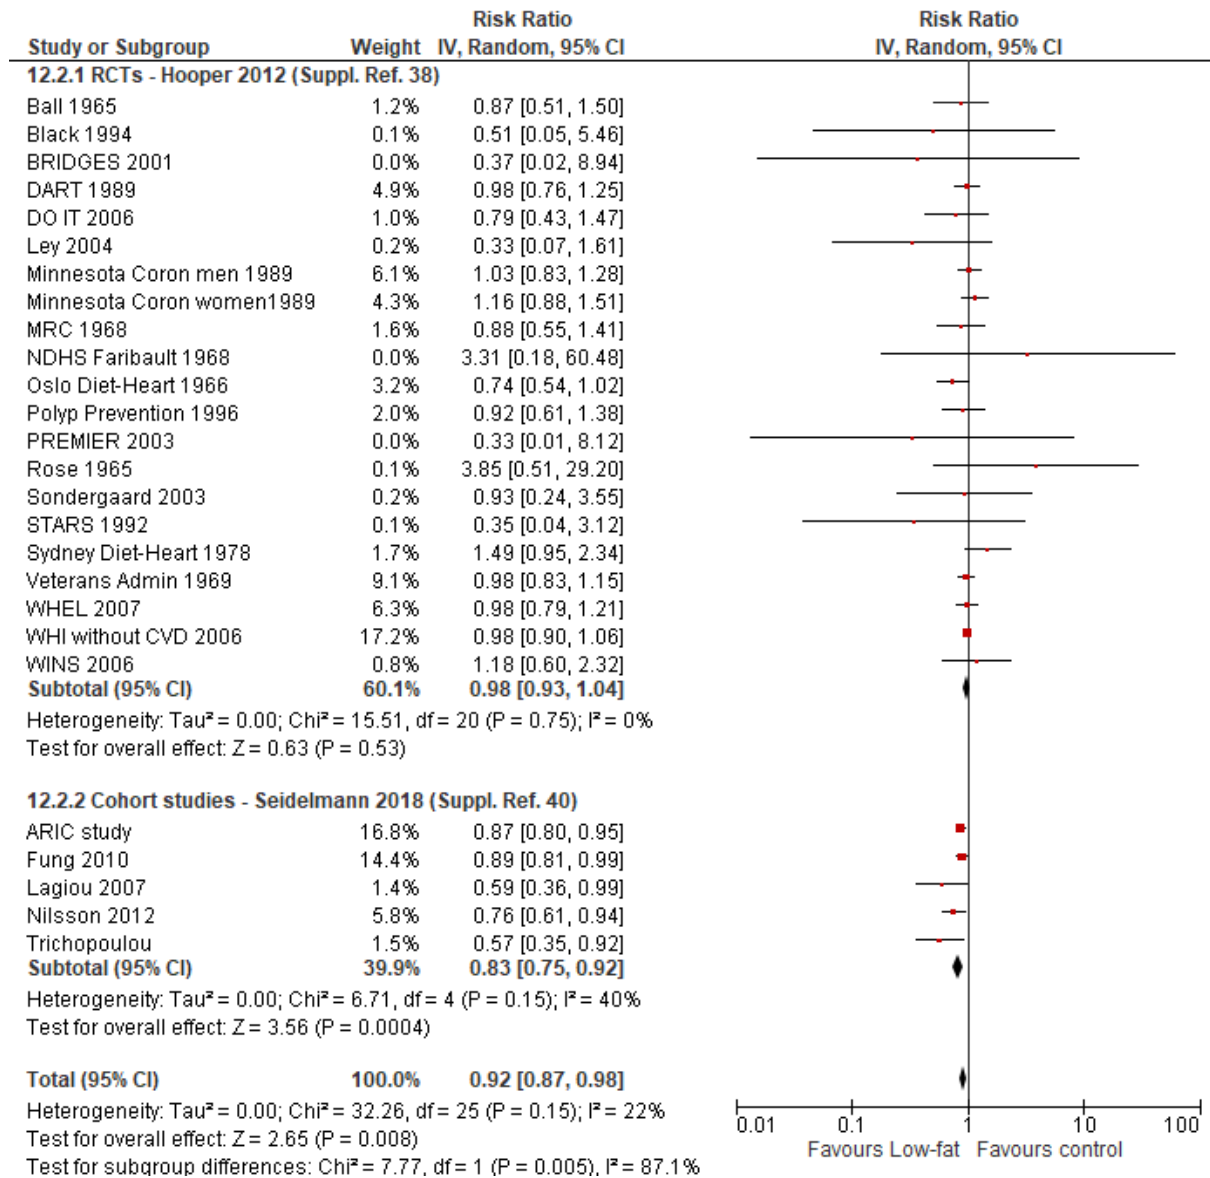

Supplementary Figure 35: Hooper et al. 2012 (38) / Seidelmann et al. 2018 (40); Intervention/ Exposure: Low fat or modified fat/ High carb; Outcome: All-cause mortality

Supplemental data

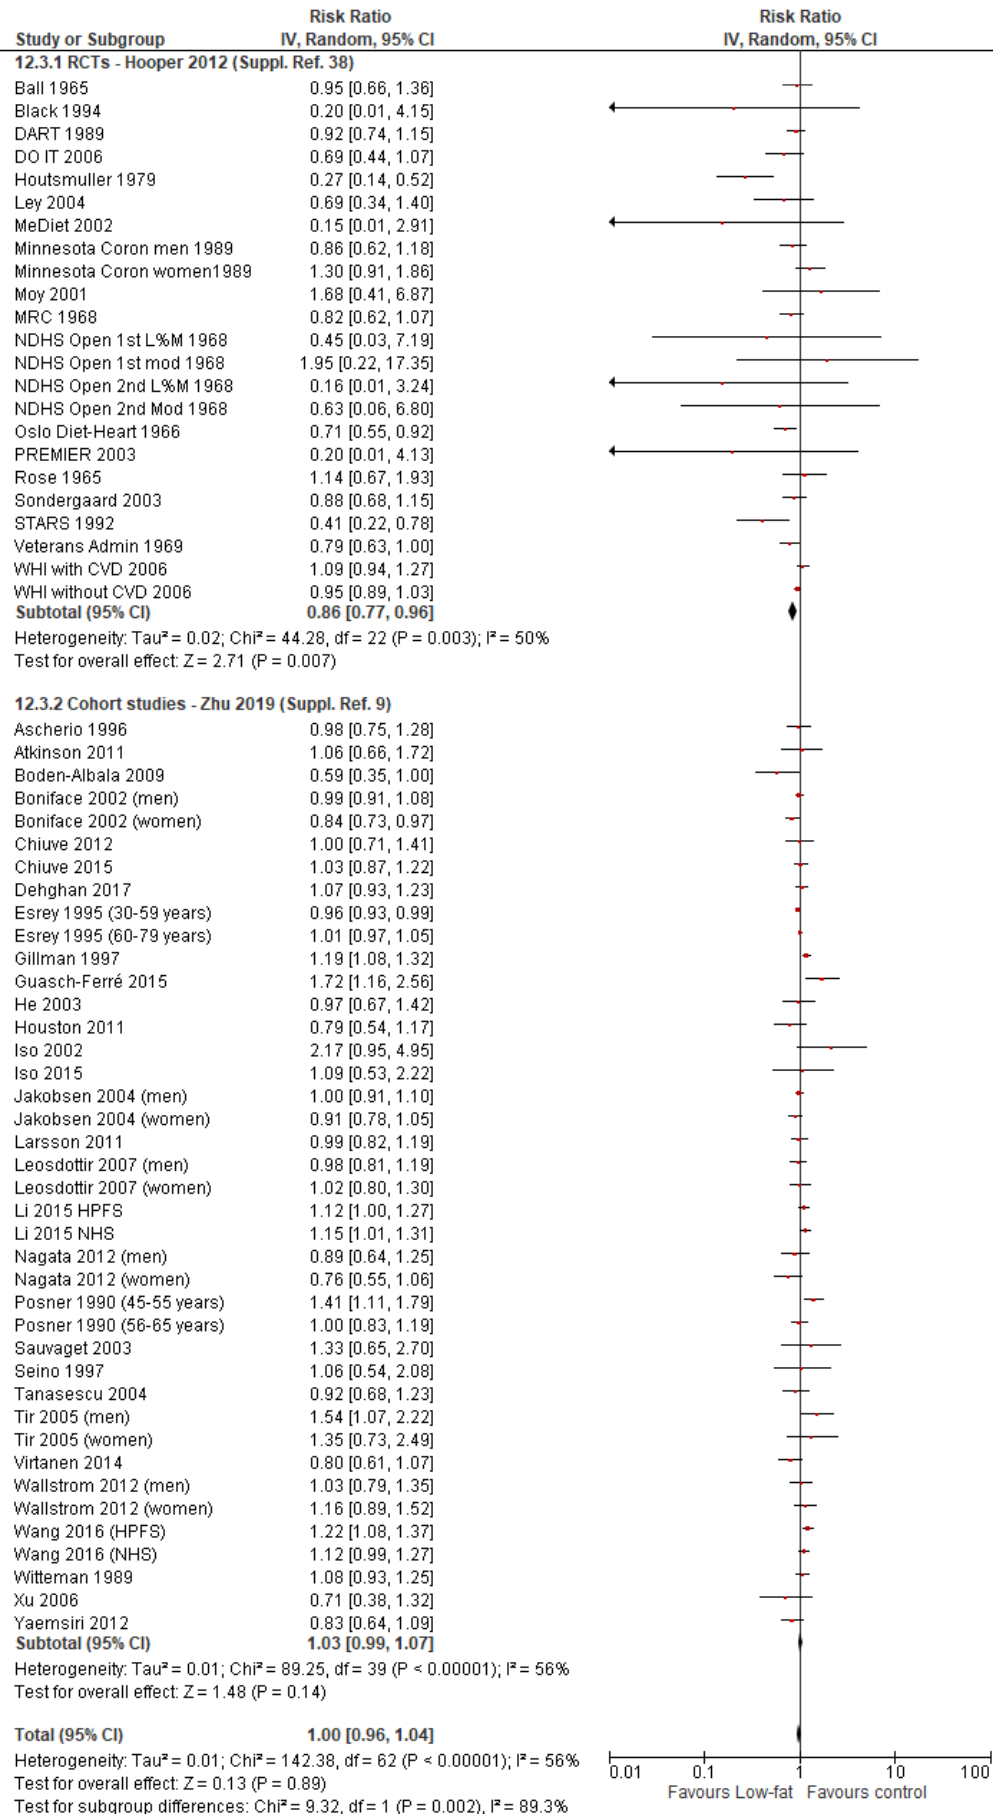

Supplementary Figure 36: Hooper et al. 2012 (38) / Zhu et al. 2019 (9); Intervention/ Exposure: Low fat or modified fat/ Low fat; Outcome: Combined cardiovascular events/ Cardiovascular disease

Supplemental data

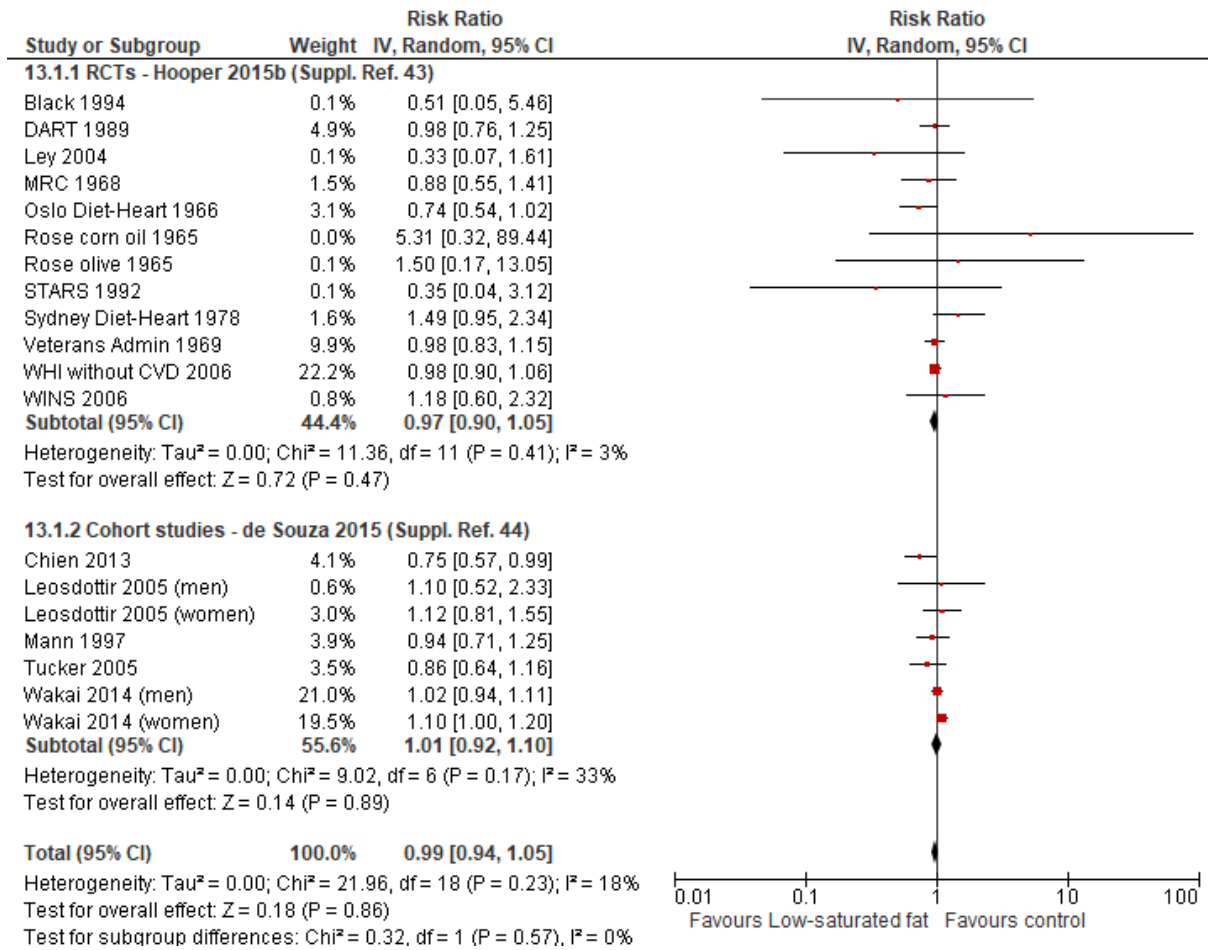

Supplementary Figure 37: Hooper et al. 2015b (43) / de Souza et al. 2015 (44); Intervention/ Exposure: Low saturated fat; Outcome: All-cause mortality

Supplemental data

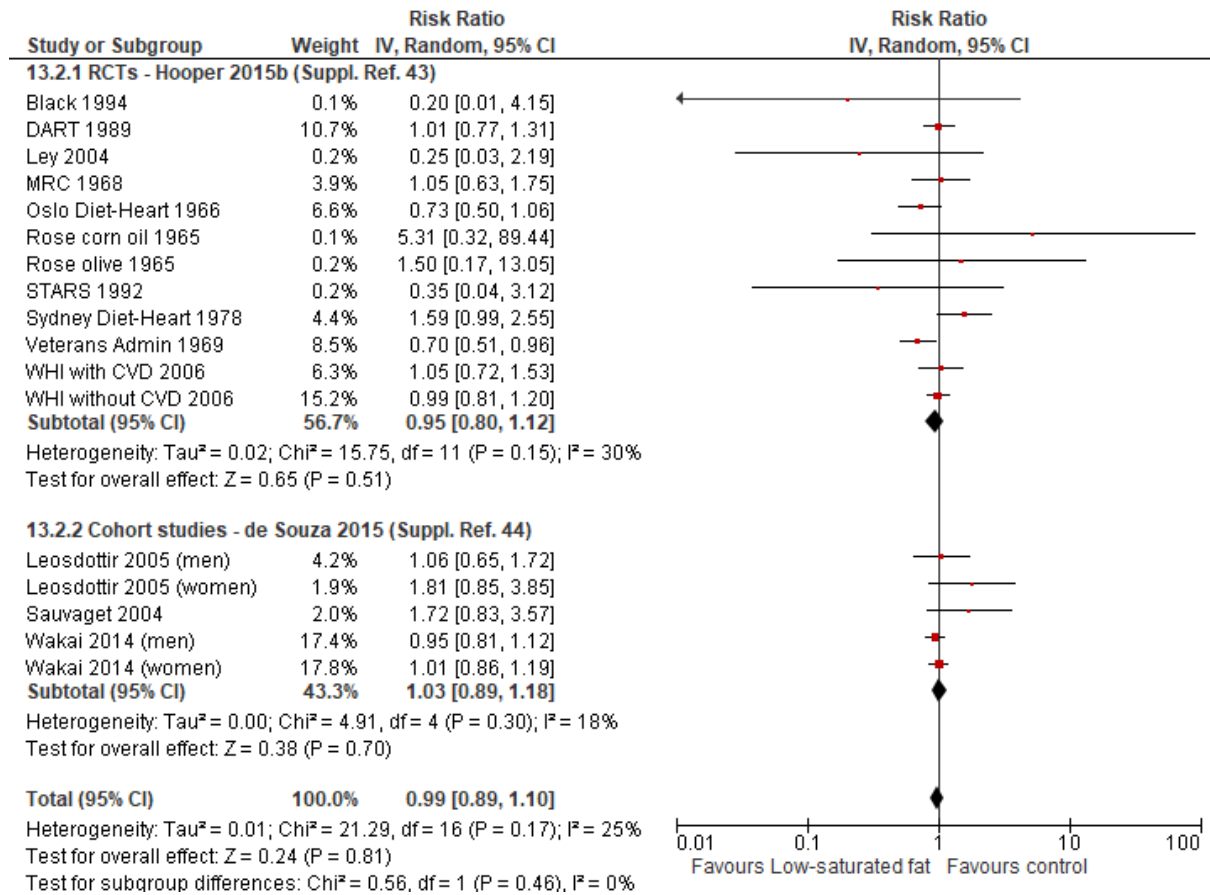

Supplementary Figure 38: Hooper et al. 2015b (43) / de Souza et al. 2015 (44); Intervention/ Exposure: Low saturated fat; Outcome: Cardiovascular mortality

Supplemental data

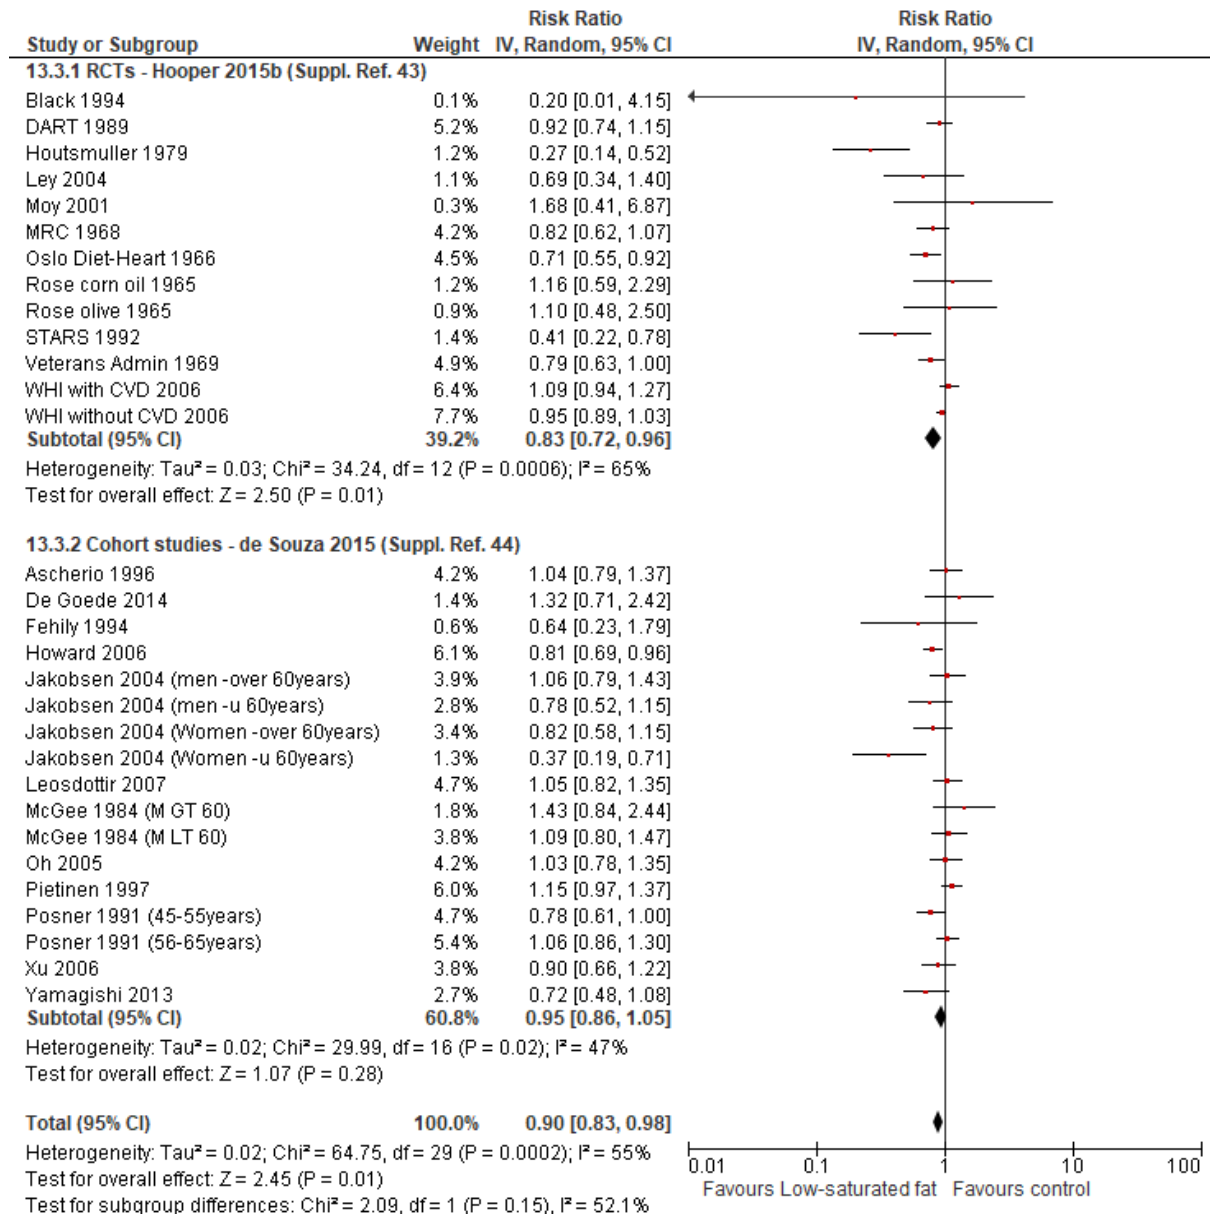

Supplementary Figure 39: Hooper et al. 2015b (43) / de Souza et al. 2015 (44); Intervention/ Exposure: Low saturated fat; Outcome: Combined cardiovascular events/ Coronary heart disease

Supplemental data

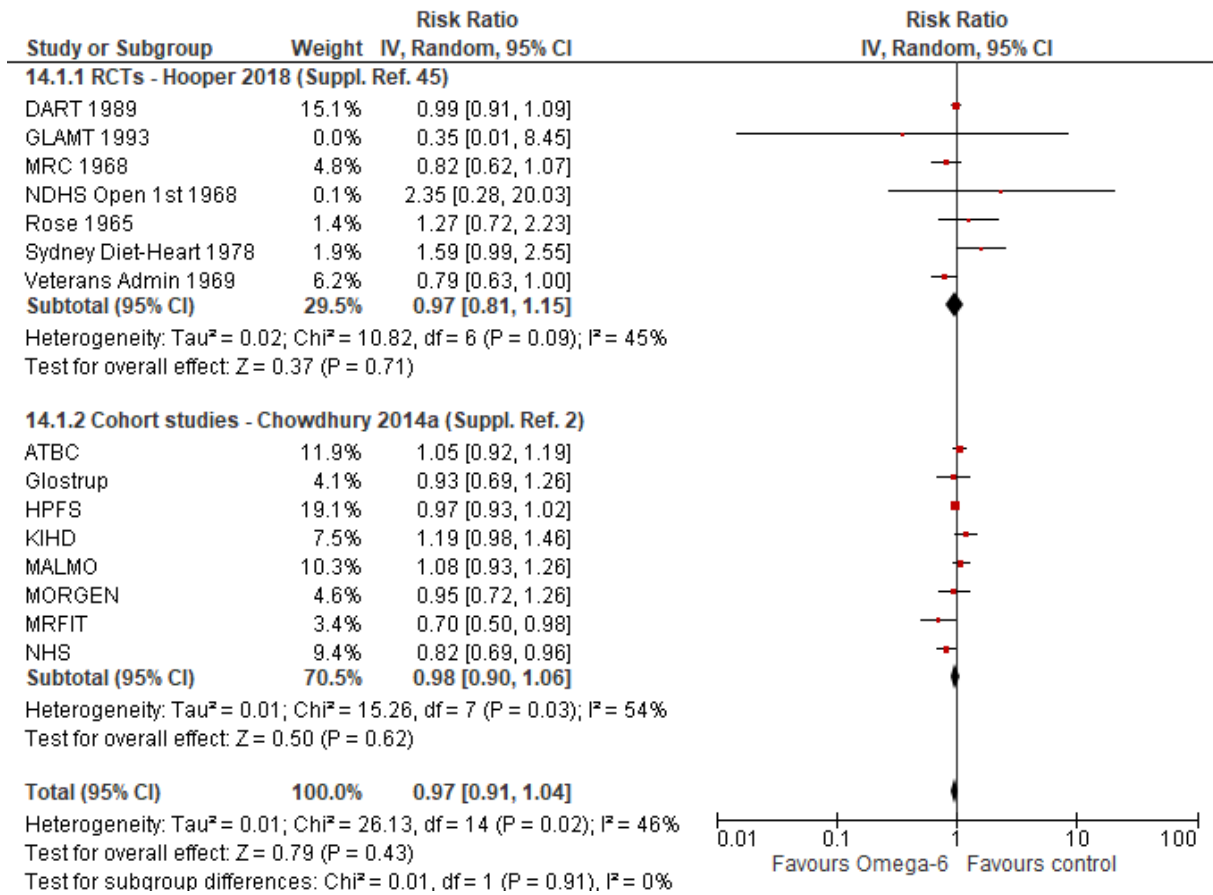

Supplementary Figure 40: Hooper et al. 2018 (45) / Chowdhury et al. 2014a (2); Intervention/ Exposure: Omega-6 fatty acids; Outcome: Combined cardiovascular events/ Coronary heart disease

Supplemental data

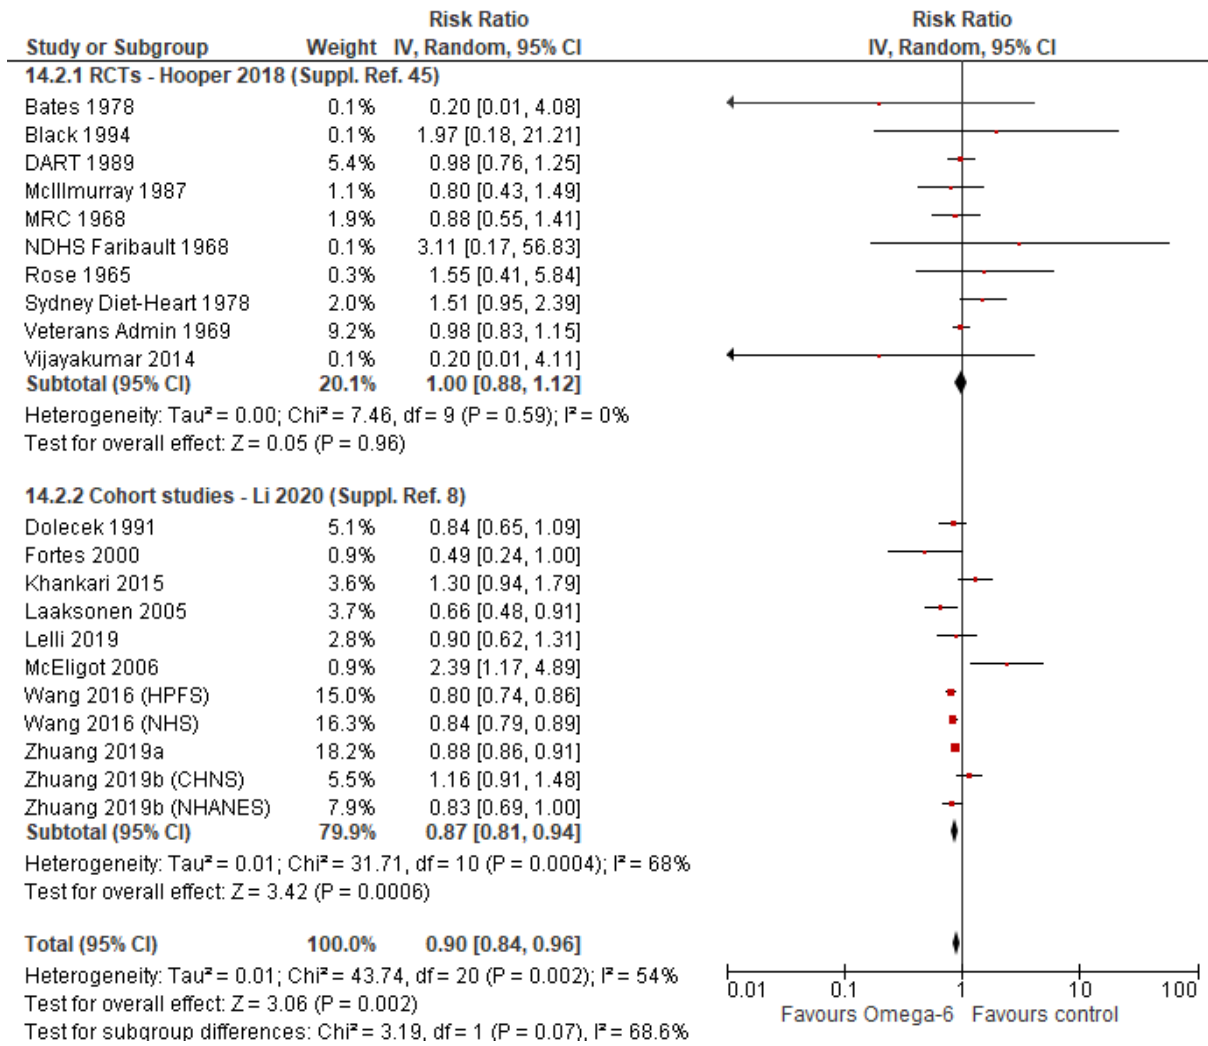

Supplementary Figure 41: Hooper et al. 2018 (45) / Li et al. 2020 (8); Intervention/ Exposure: Omega-6 fatty acids/ Linoleic acid; Outcome: All-cause mortality



Supplemental data

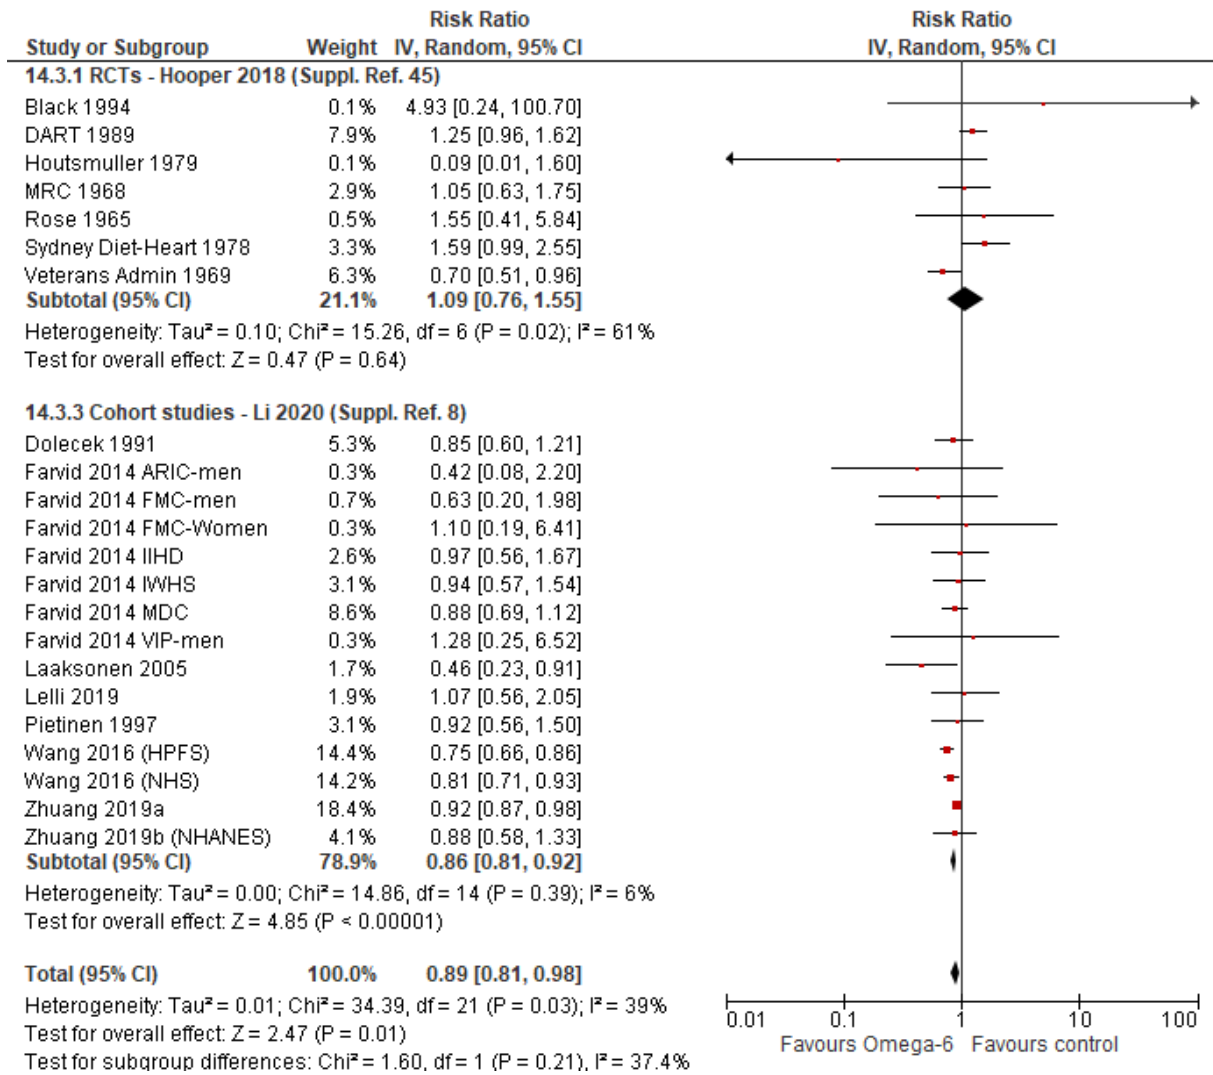

Supplementary Figure 42: Hooper et al. 2018 (45) / Li et al. 2020 (8); Intervention/ Exposure: Omega-6 fatty acids/ Linoleic acid; Outcome: Cardiovascular mortality

Supplemental data

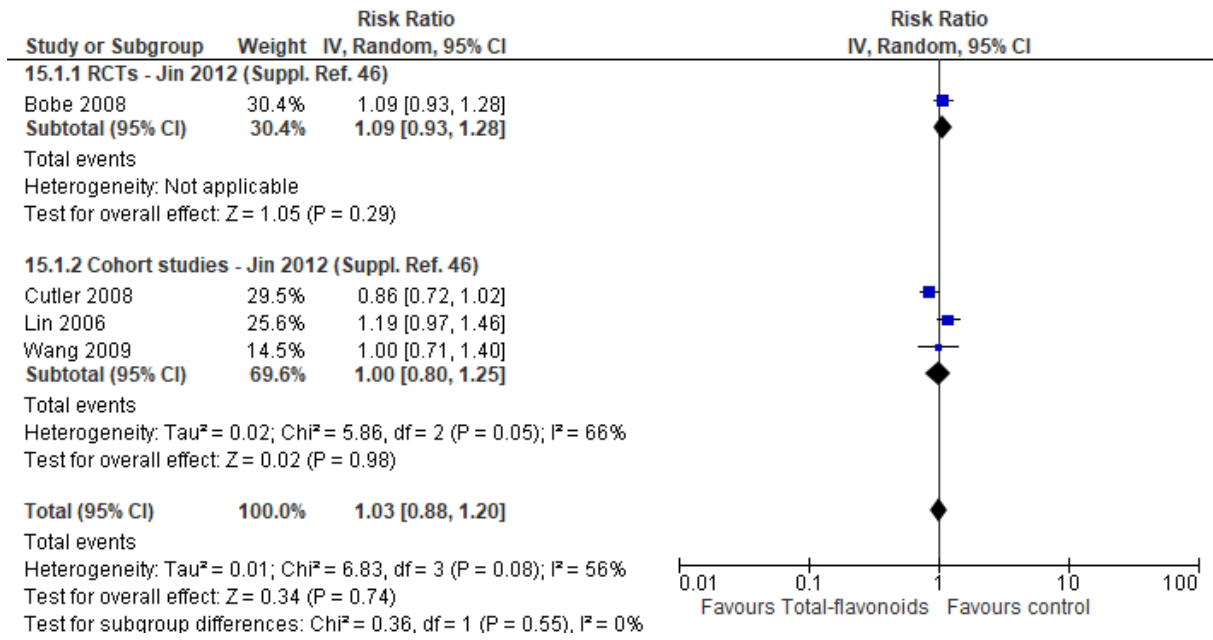

Supplementary Figure 43: Jin et al. 2012 (46) / Jin et al. 2012 (46); Intervention/ Exposure: Total flavonoids; Outcome: Colorectal adenoma/ Colorectal cancer

Supplemental data

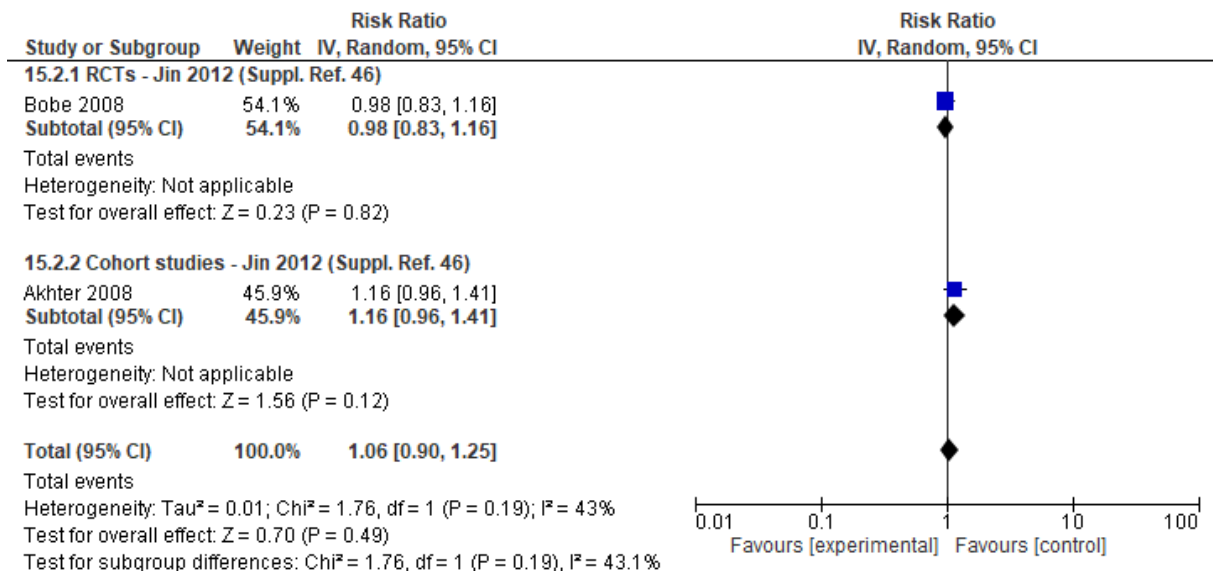

Supplementary Figure 44: Jin et al. 2012 (46) / Jin et al. 2012 (46); Intervention/ Exposure: Isoflavonoes; Outcome: Colorectal adenoma/ Colorectal cancer

Supplemental data

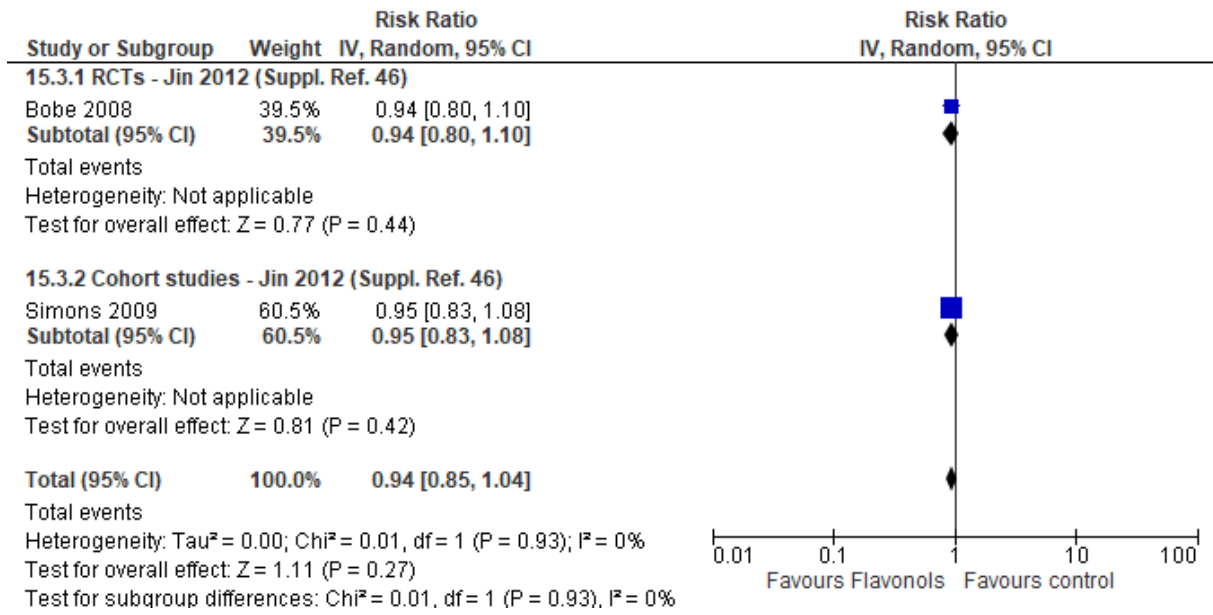

Supplementary Figure 45: Jin et al. 2012 (46) / Jin et al. 2012 (46); Intervention/ Exposure: Flavonols; Outcome: Colorectal adenoma/ Colorectal cancer

Supplemental data

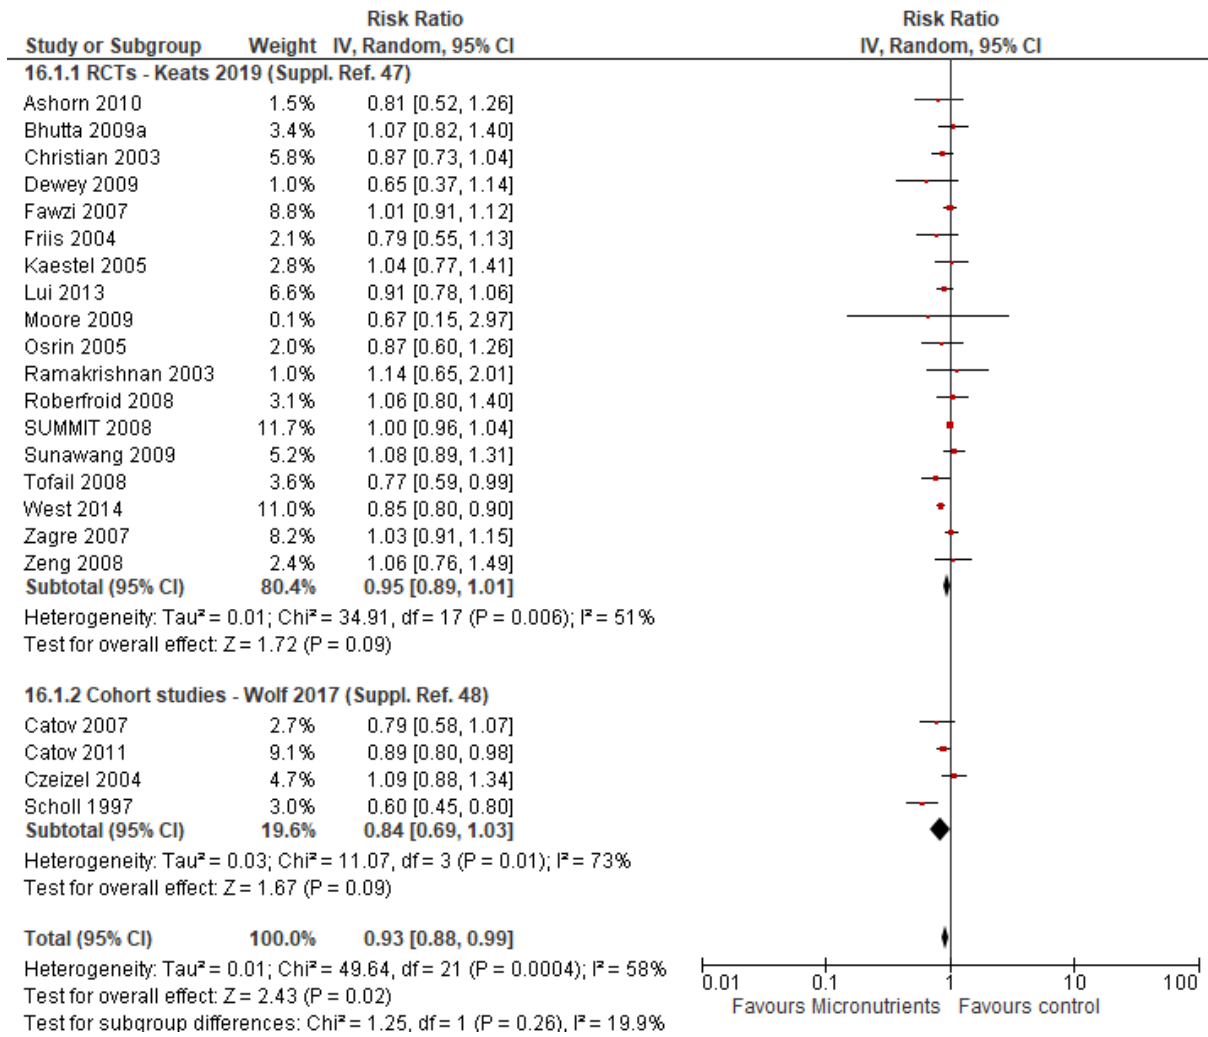

Supplementary Figure 46: Keats et al. 2019 (47) / Wolf et al. 2017 (48); Intervention/ Exposure: Micronutrients/ Multivitamin; Outcome: Preterm birth

Supplemental data

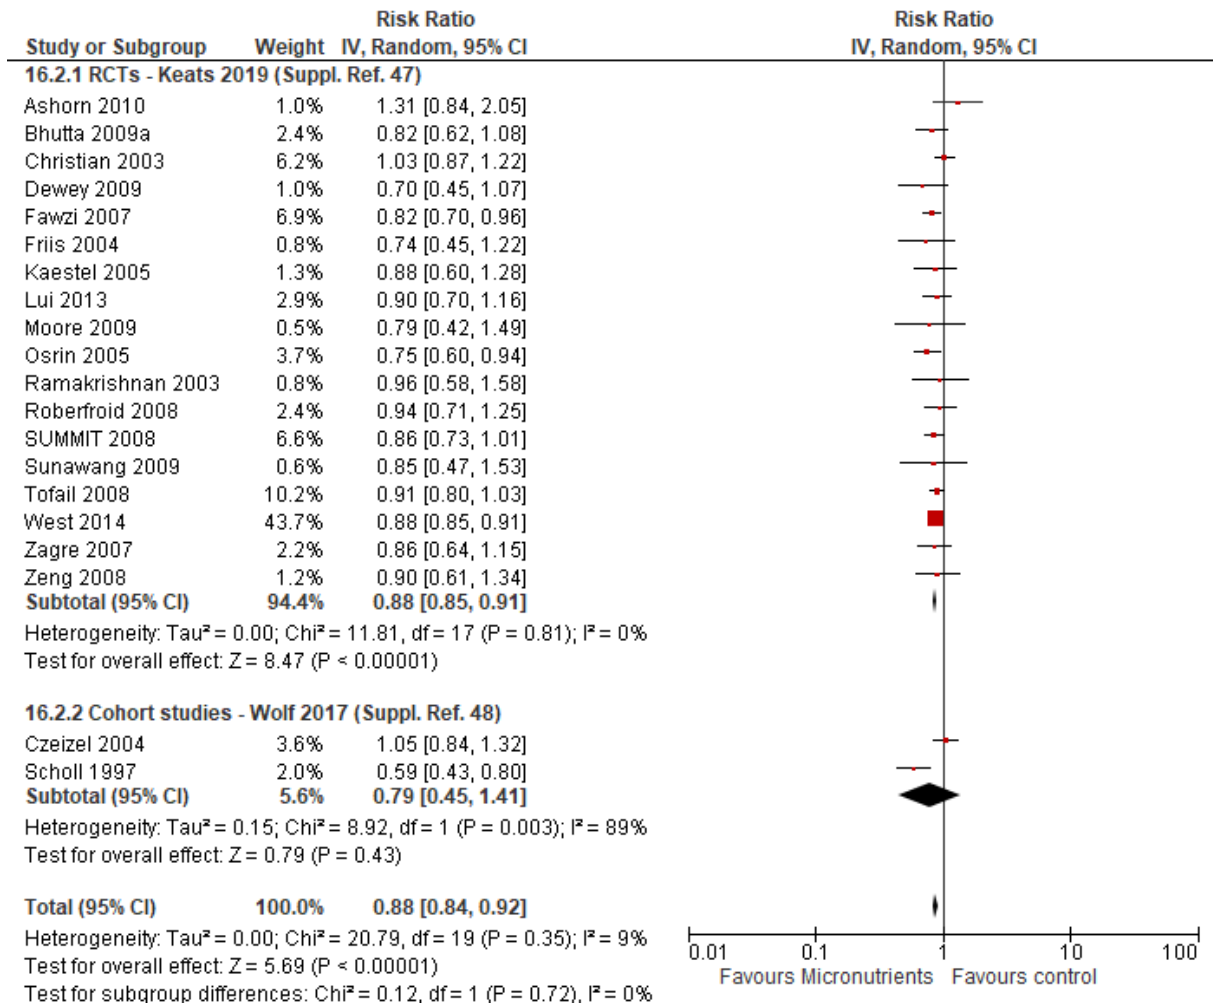

Supplementary Figure 47: Keats et al. 2019 (47) / Wolf et al. 2017 (48); Intervention/ Exposure: Micronutrients/ Multivitamin; Outcome: Low birth weight

Supplemental data

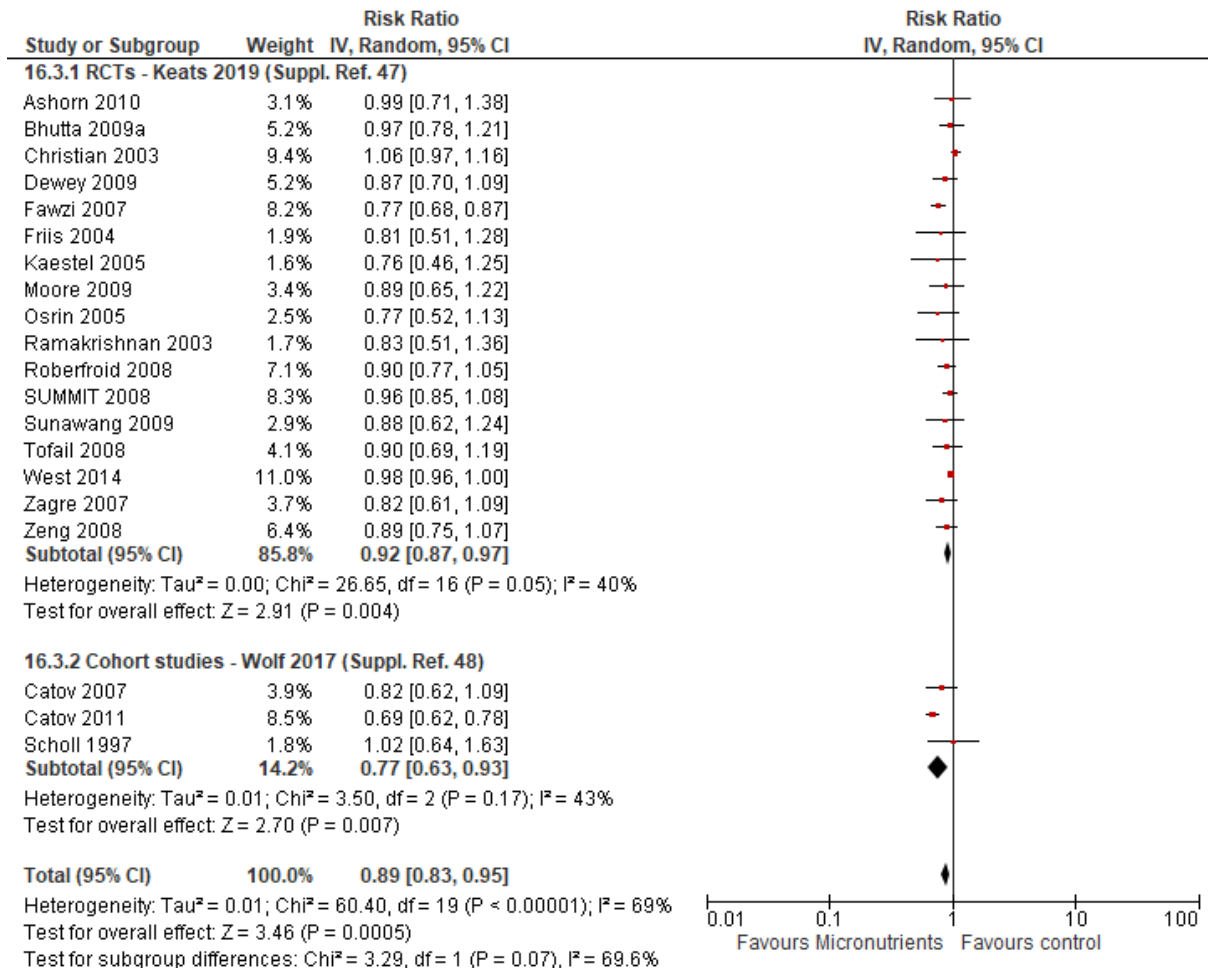

Supplementary Figure 48: Keats et al. 2019 (47) / Wolf et al. 2017 (48); Intervention/ Exposure: Micronutrients/ Multivitamin; Outcome: Small gestational age

Supplemental data

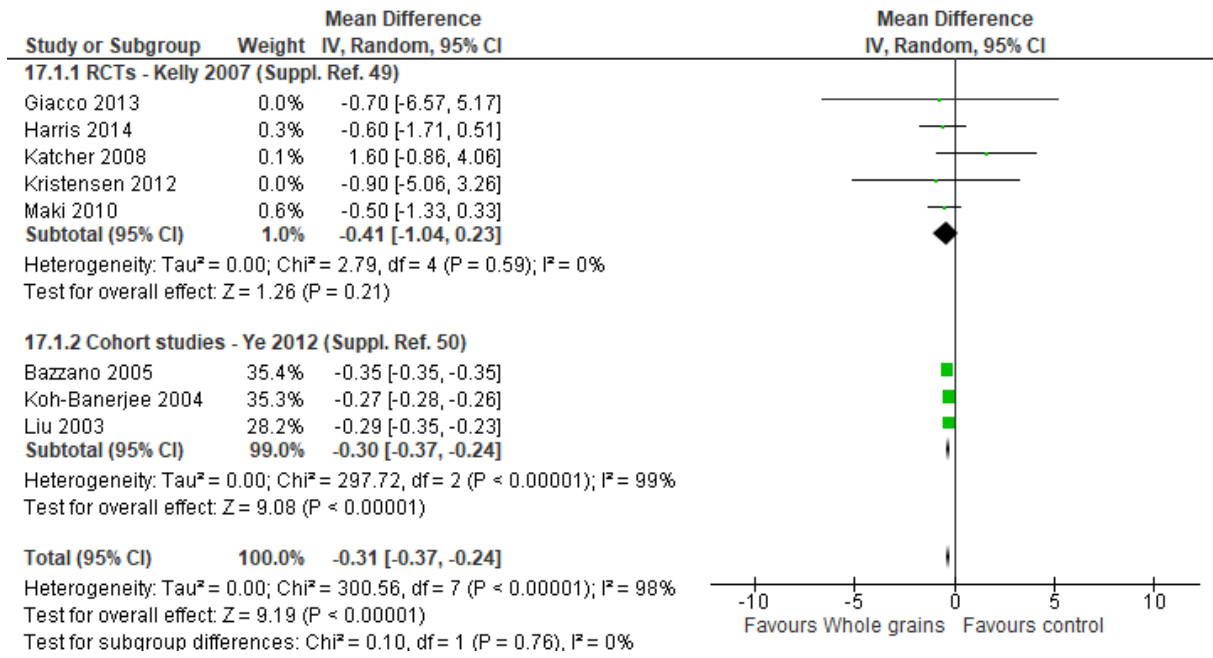

Supplementary Figure 49: Kelly et al. 2017 (49) / Ye et al. 2012 (50); Intervention/ Exposure: Whole grains; Outcome: Body weight (kg)



Supplemental data

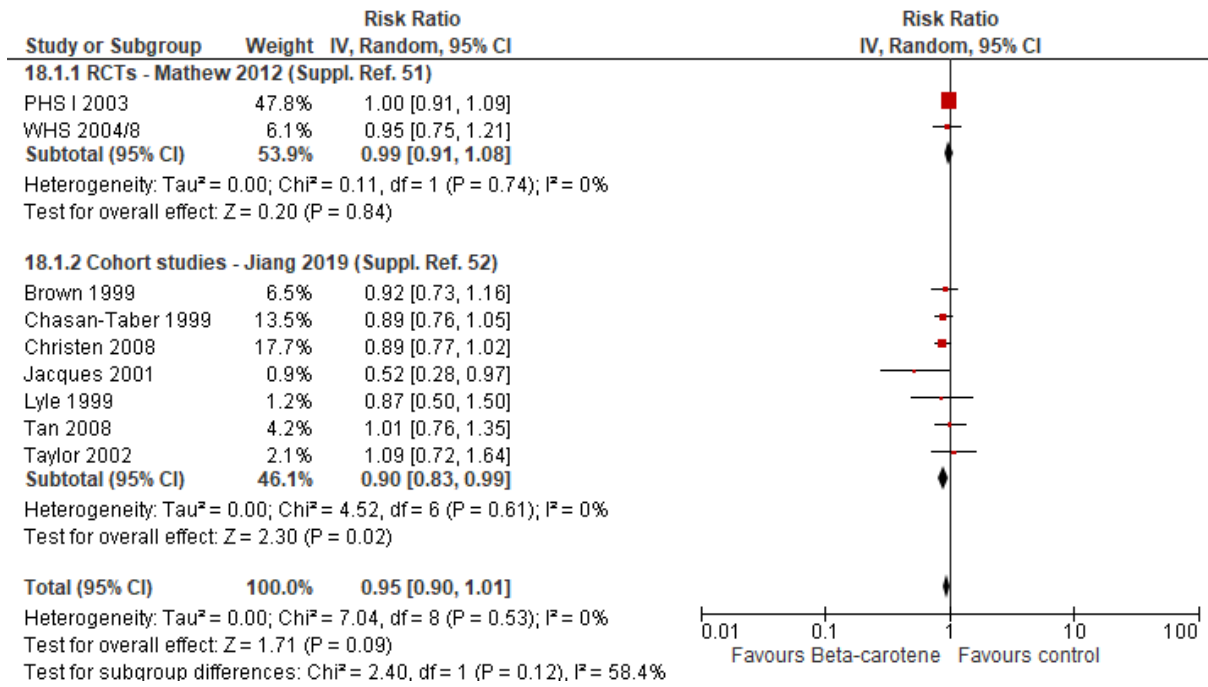

Supplementary Figure 50: Mathew et al. 2012 (51) / Jiang et al. 2019 (52); Intervention/ Exposure: Beta-carotene; Outcome: Cataract

Supplemental data

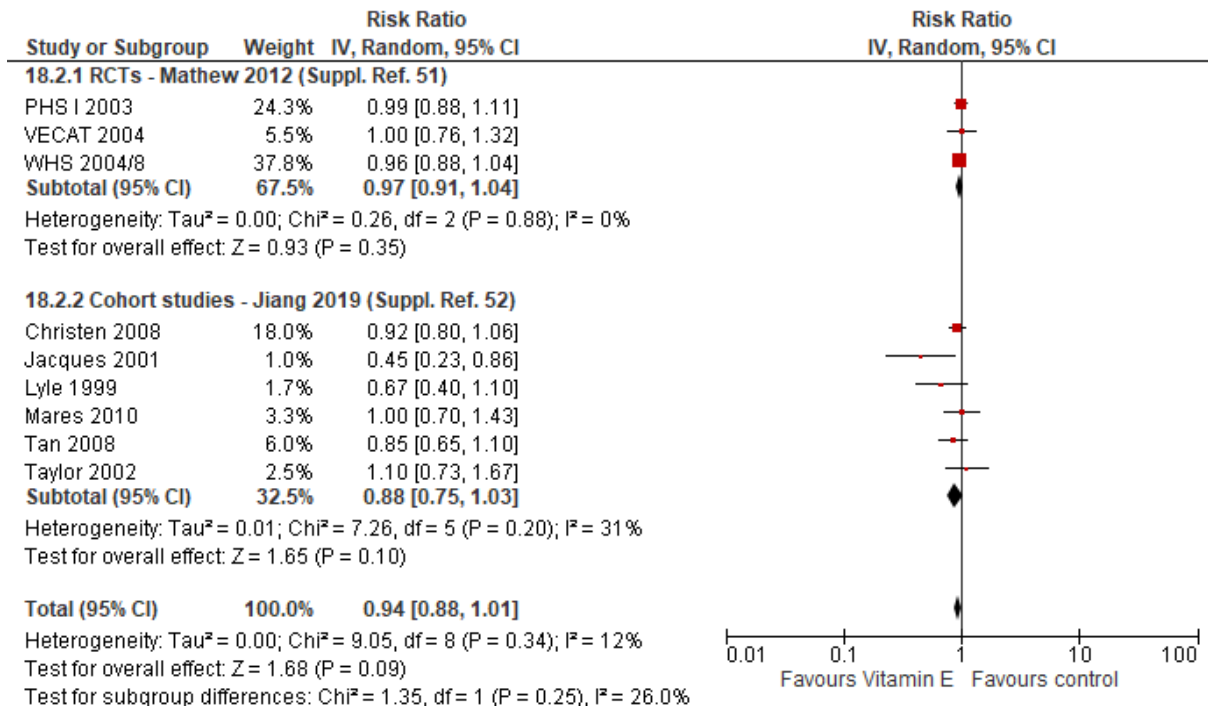

Supplementary Figure 51: Mathew et al. 2012 (51) / Jiang et al. 2019 (52); Intervention/ Exposure: Vitamin E; Outcome: Cataract

Supplemental data

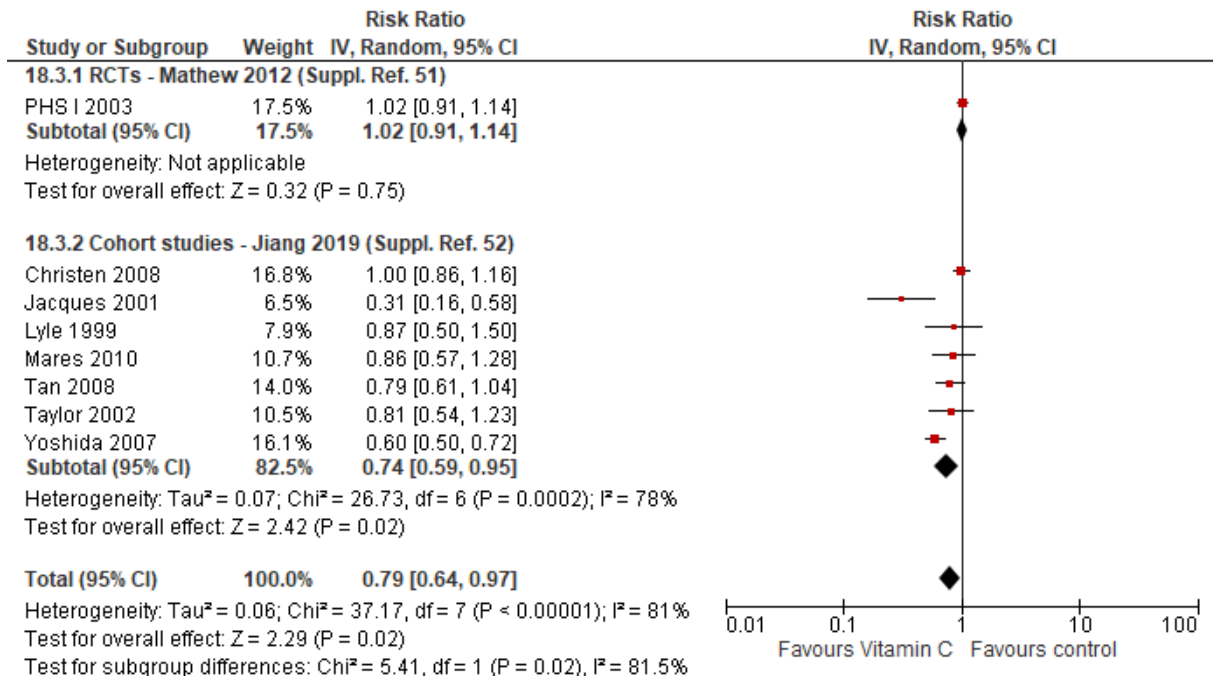

Supplementary Figure 52: Mathew et al. 2012 (51) / Jiang et al. 2019 (52); Intervention/ Exposure: Vitamin C; Outcome: Cataract

Supplemental data

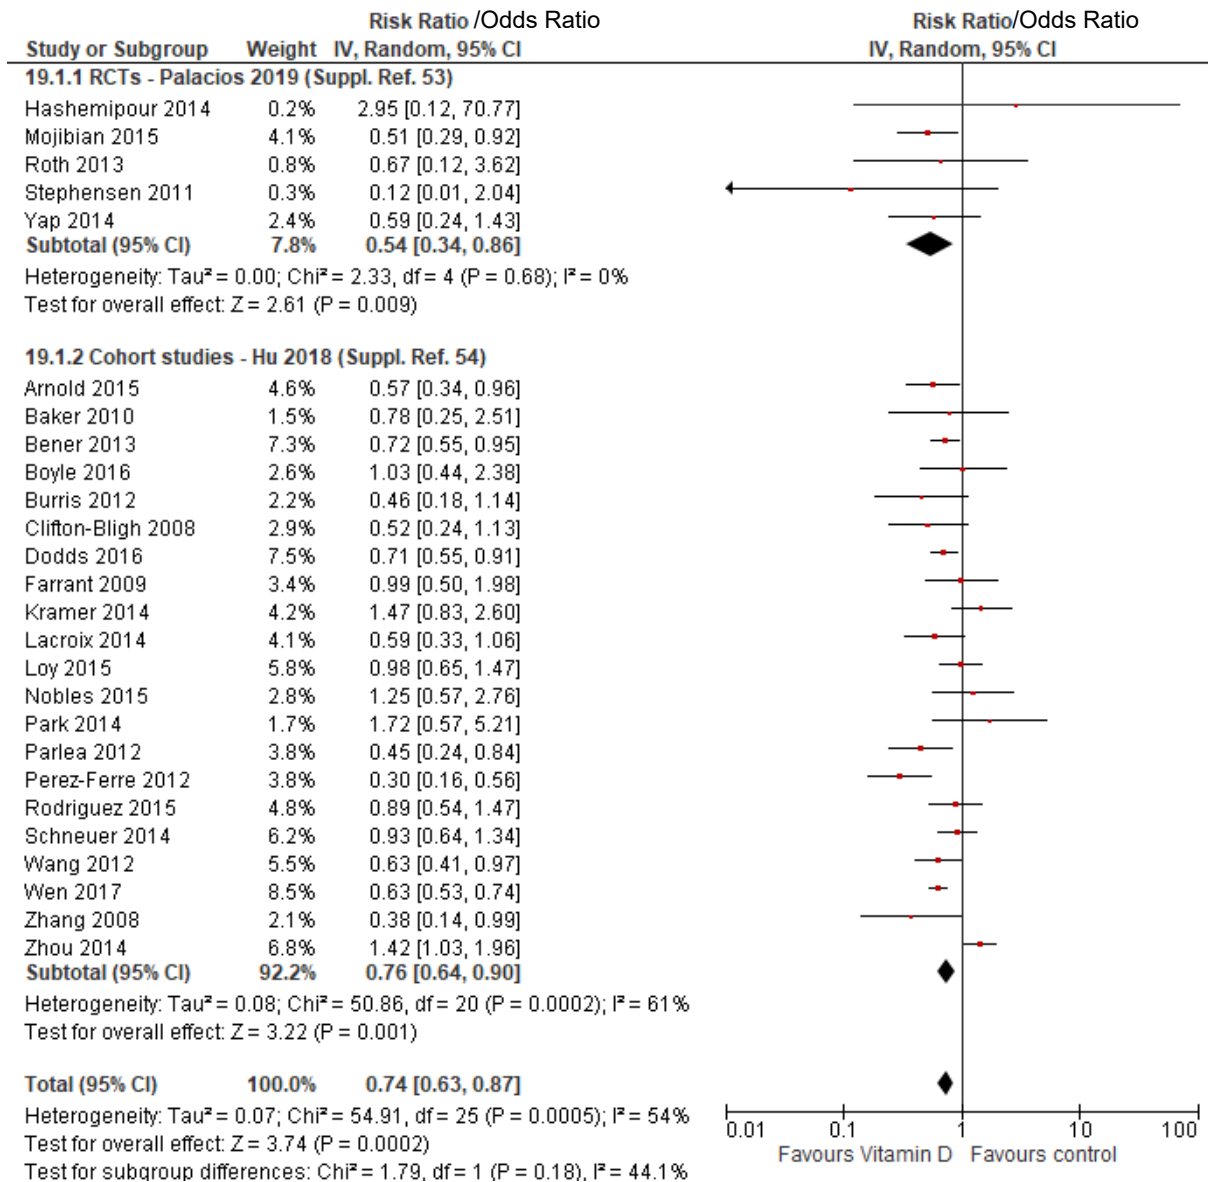

Supplementary Figure 53: Palacios et al. 2019 (53) / Hu et al. 2018 (54); Intervention/ Exposure: Vitamin D; Outcome: Gestational diabetes

Supplemental data

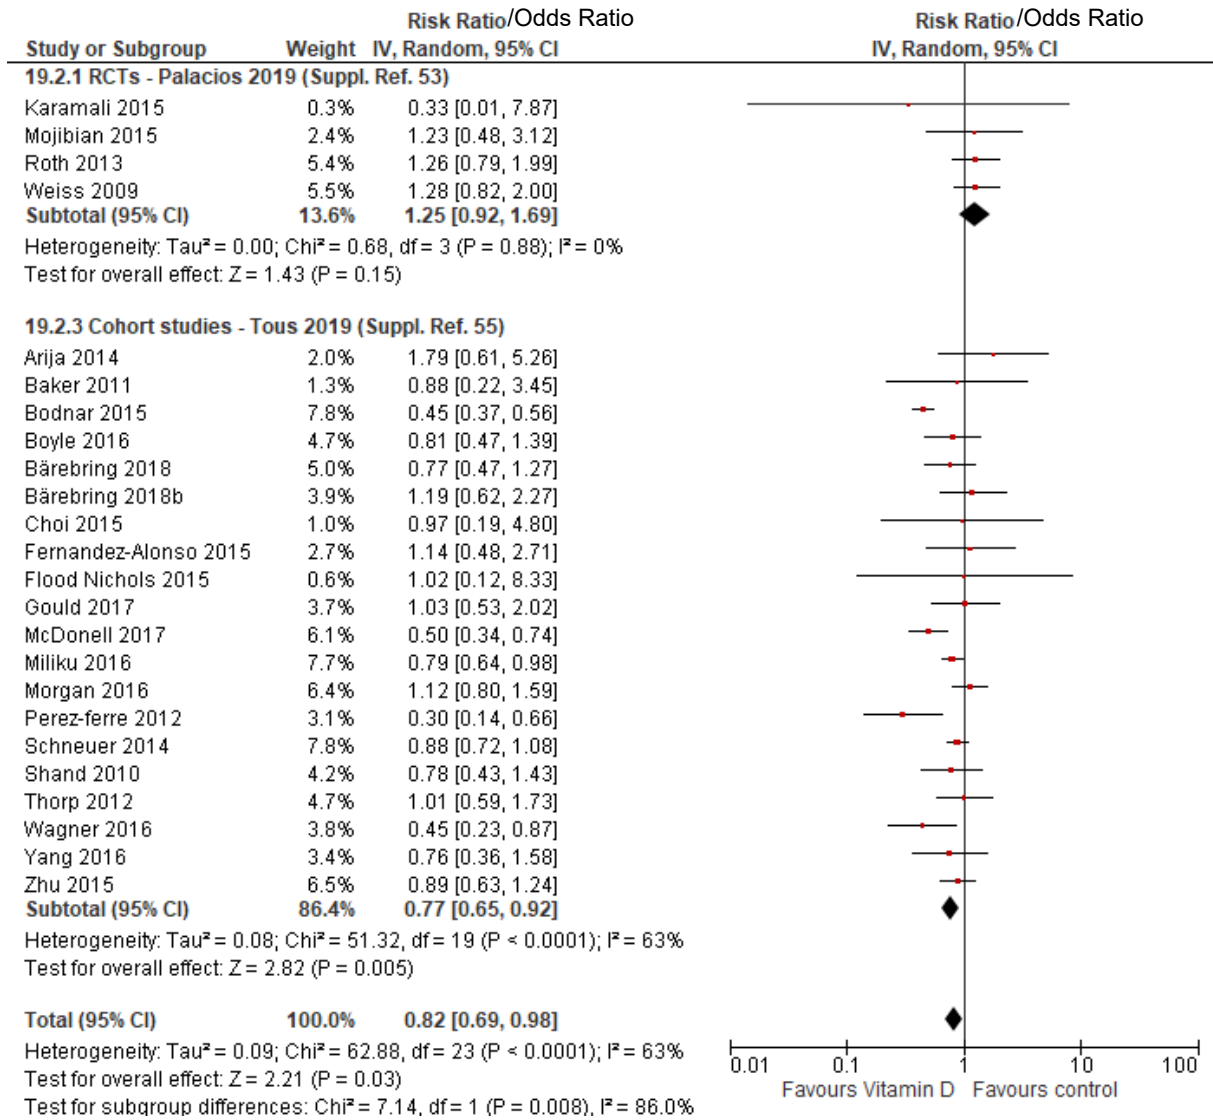

Supplementary Figure 54: Palacios et al. 2019 (53) / Tous et al. 2020 (55); Intervention/ Exposure: Vitamin D; Outcome: Preterm birth

Supplemental data

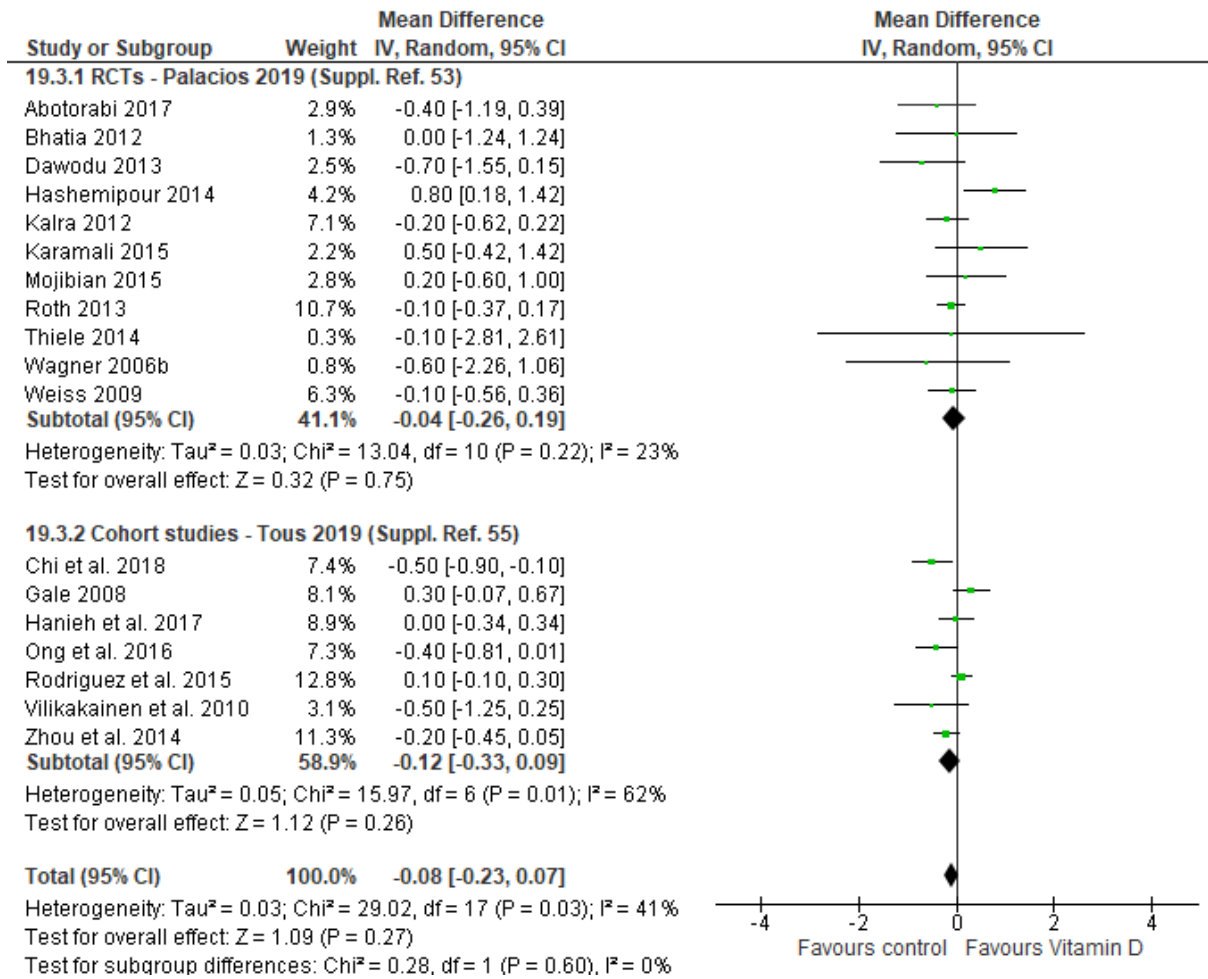

Supplementary Figure 55: Palacios et al. 2019 (53) / Tous et al. 2020 (55); Intervention/ Exposure: Vitamin D; Outcome: Birth length (cm)

Supplemental data

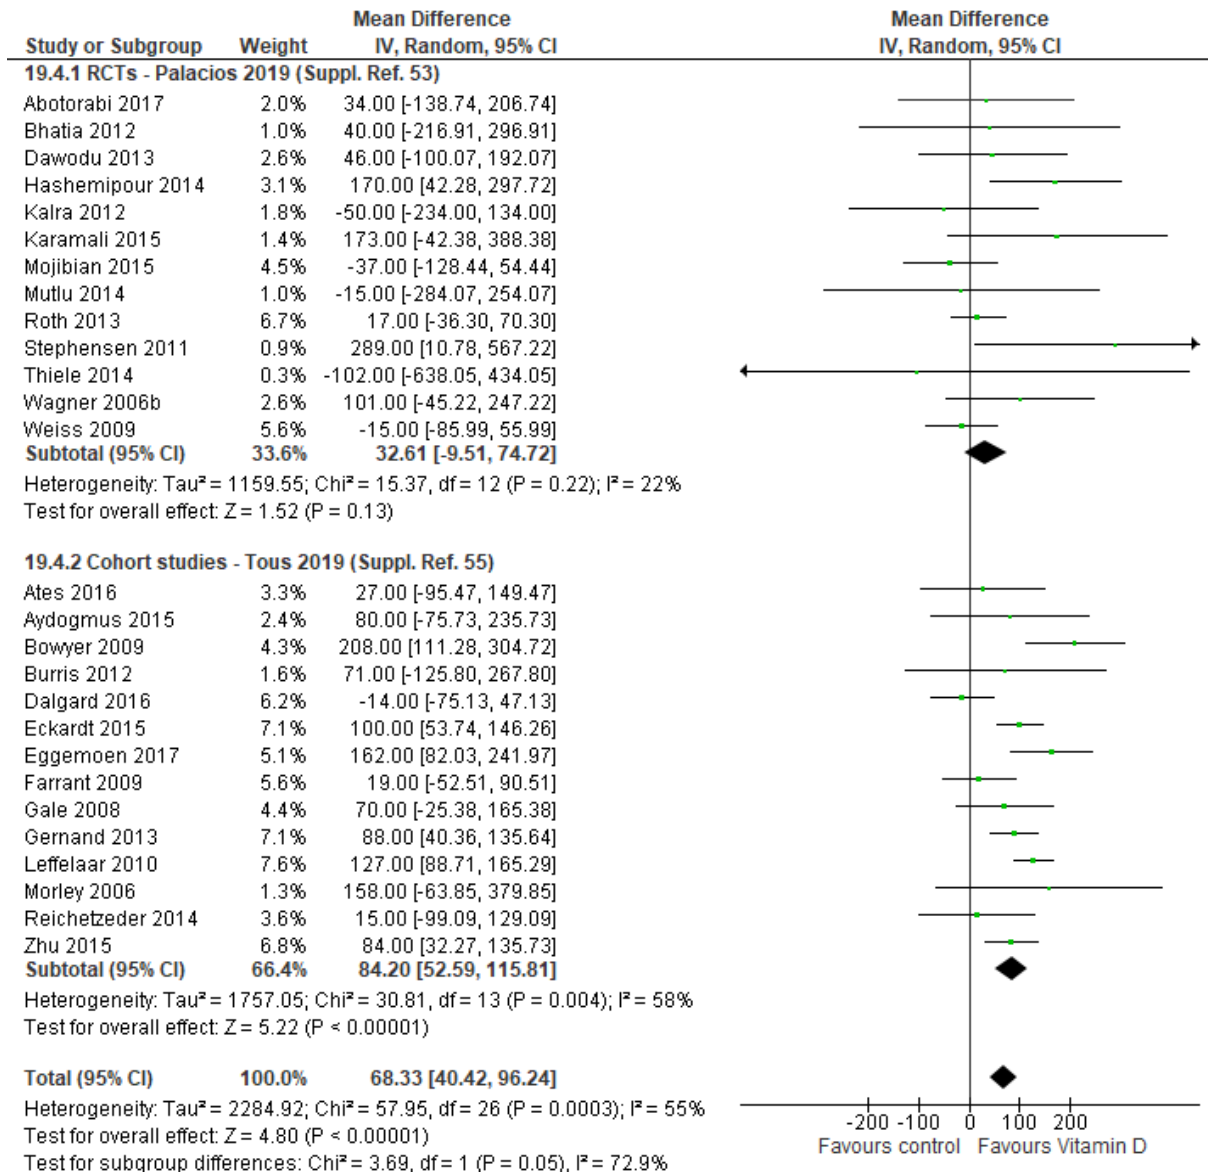

Supplementary Figure 56: Palacios et al. 2019 (53) / Tous et al. 2020 (55); Intervention/ Exposure: Vitamin D; Outcome: Birth weight (g)

Supplemental data

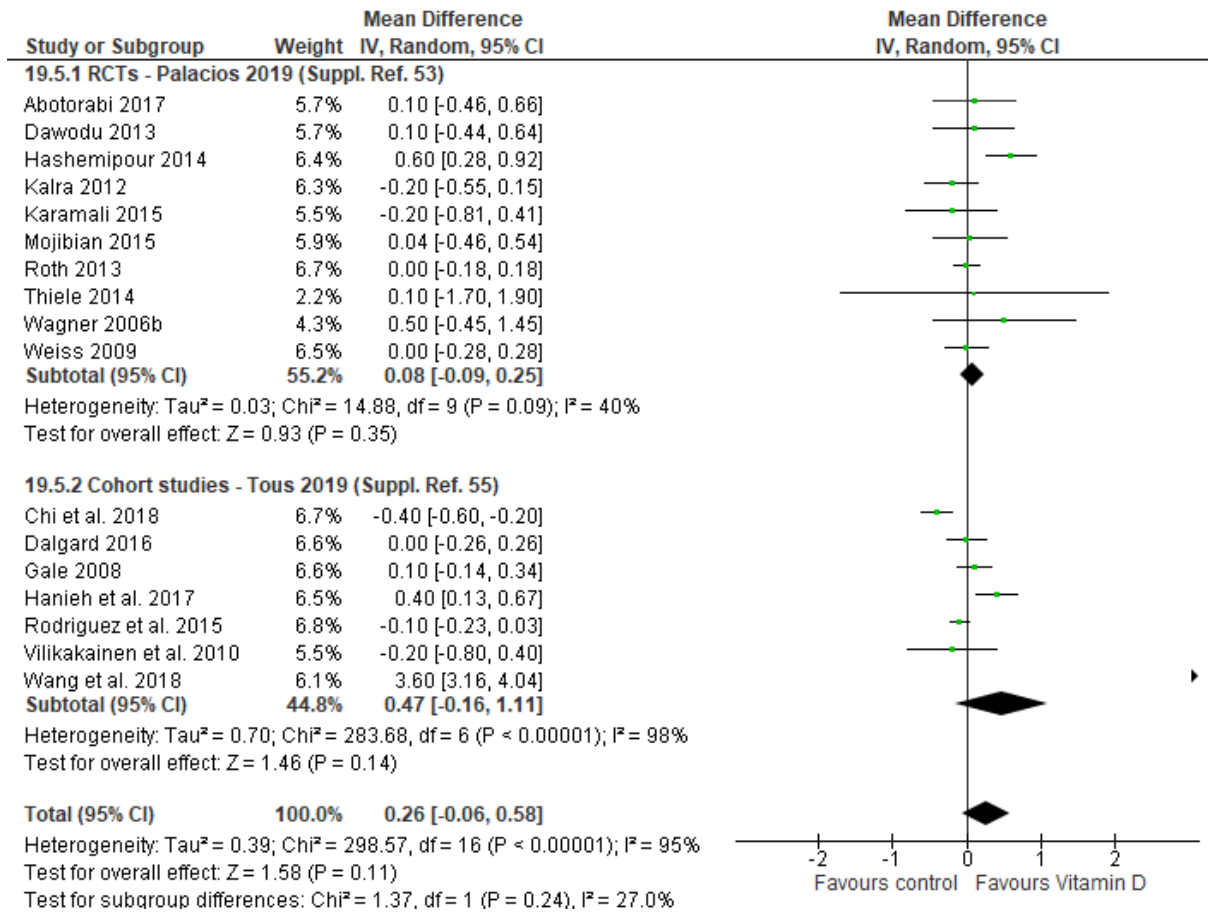

Supplementary Figure 57: Palacios et al. 2019 (53) / Tous et al. 2020 (55); Intervention/ Exposure: Vitamin D; Outcome: Head circumference at birth (cm)



Supplemental data

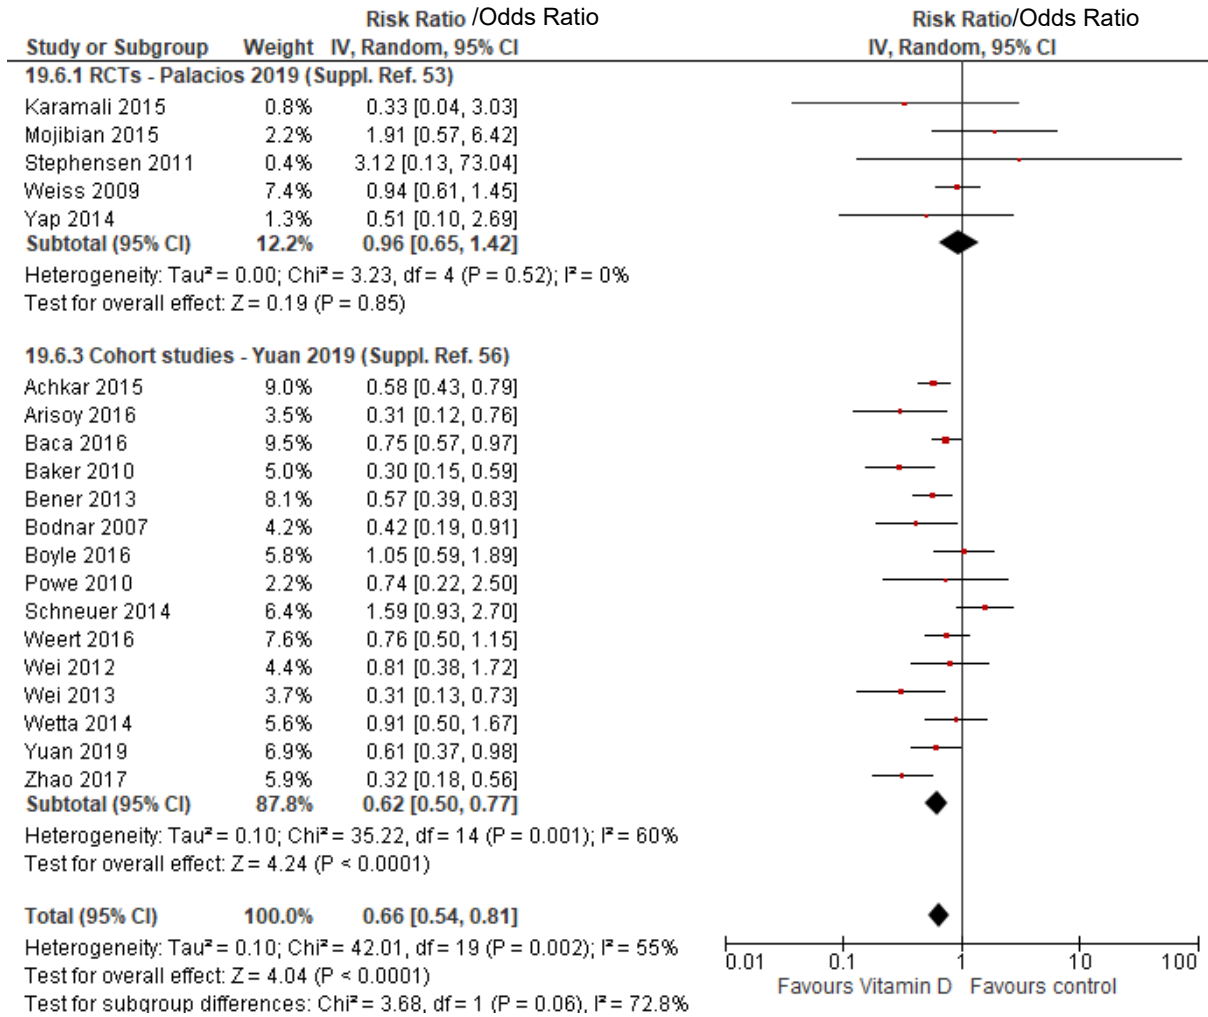

Supplementary Figure 58: Palacios et al. 2019 (53) / Yuan et al. 2019 (56); Intervention/ Exposure: Vitamin D; Outcome: Pre-eclampsia

Supplemental data

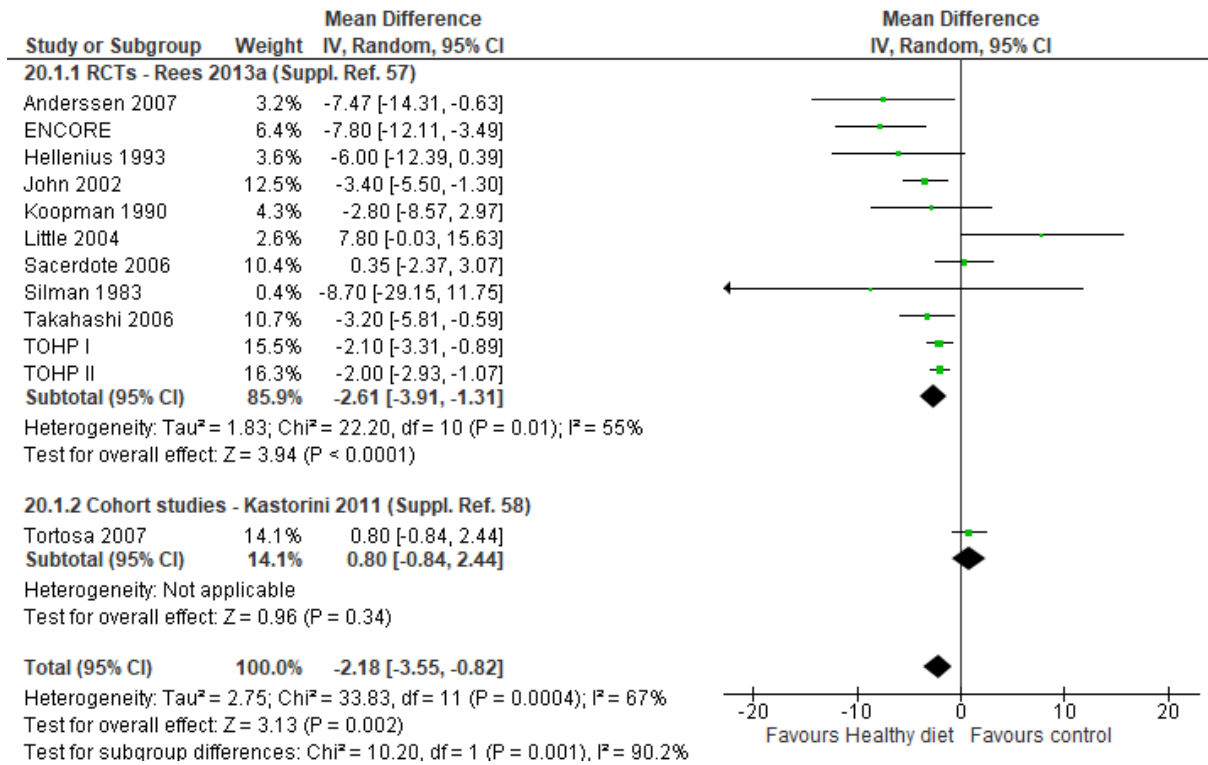

Supplementary Figure 59: Rees et al. 2013a (57) / Kastorini et al. 2011 (58); Intervention/ Exposure: Healthy diet/ Mediterranean diet; Outcome: Systolic blood pressure (mmHG)

Supplemental data

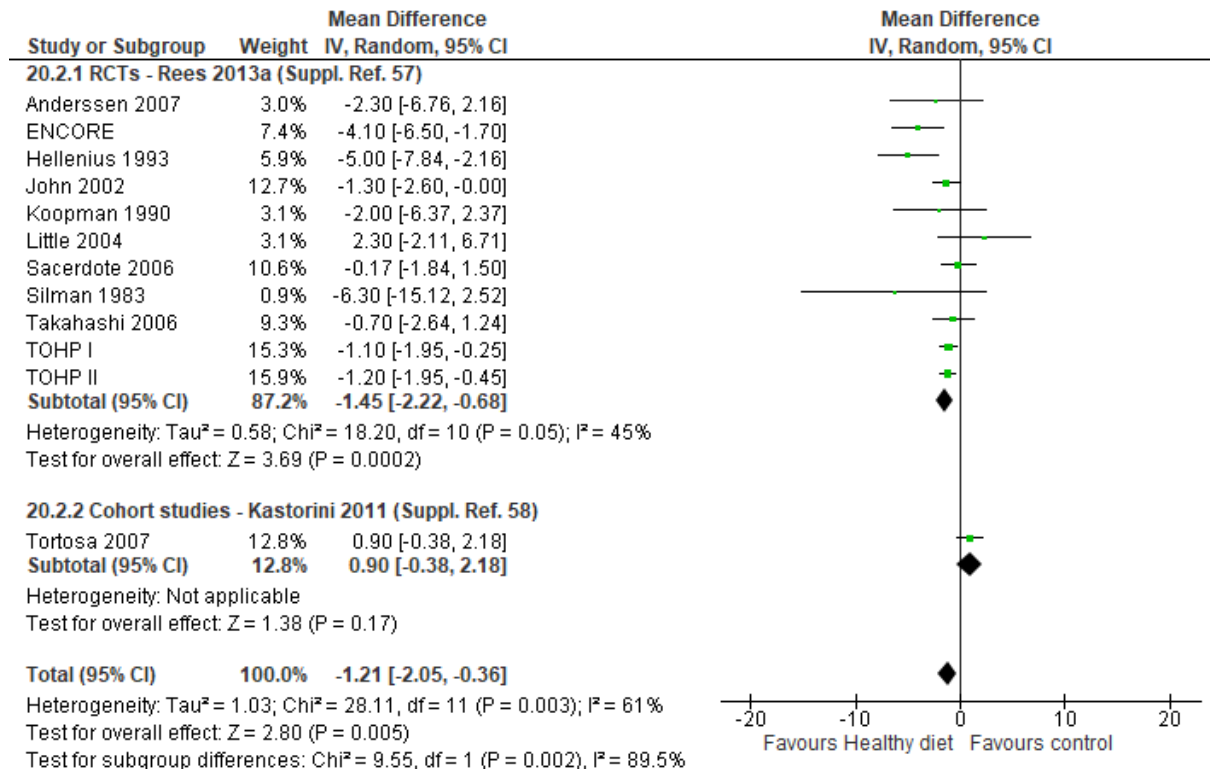

Supplementary Figure 60: Rees et al. 2013a (57) / Kastorini et al. 2011 (58); Intervention/ Exposure: Healthy diet/ Mediterranean diet; Outcome: Diastolic blood pressure (mmHG)

Supplemental data

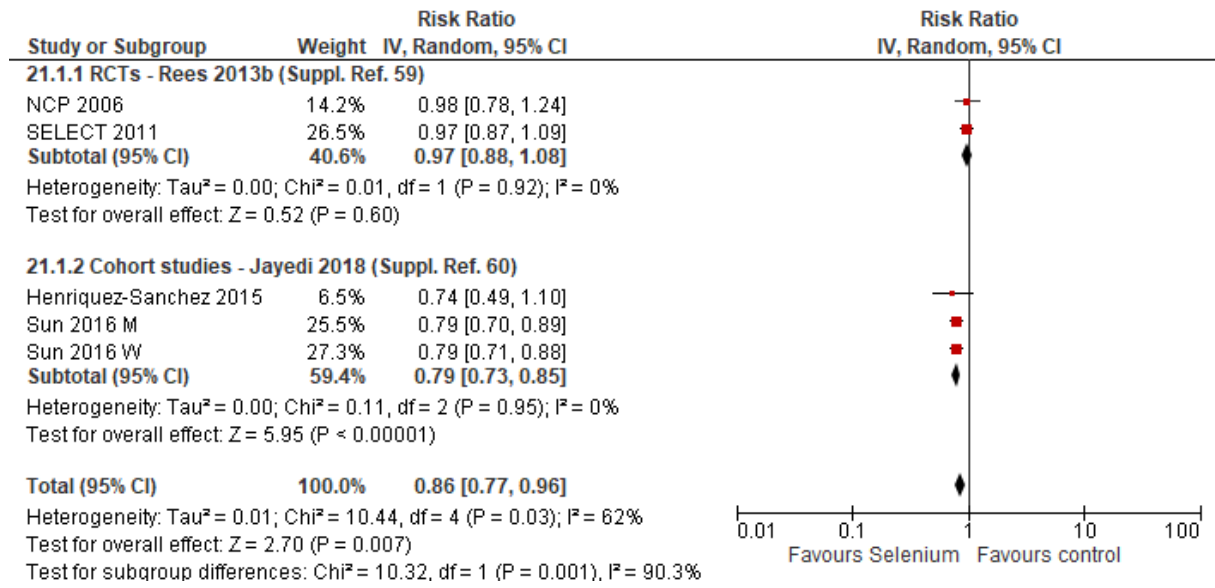

Supplementary Figure 61: Rees et al. 2013b (59) / Jayedi et al. 2018 (60); Intervention/ Exposure: Selenium; Outcome: All-cause mortality

Supplemental data

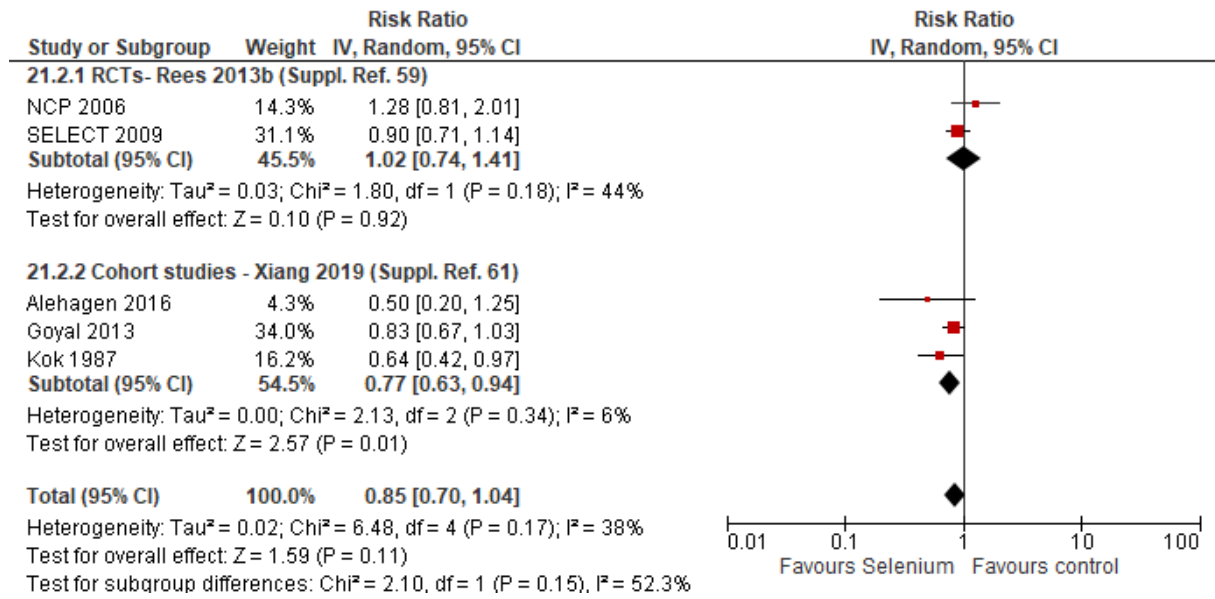

Supplementary Figure 62: Rees et al. 2013b (59) / Xiang et al. 2019 (61); Intervention/ Exposure: Selenic acid; Outcome: Cardiovascular mortality

Supplemental data

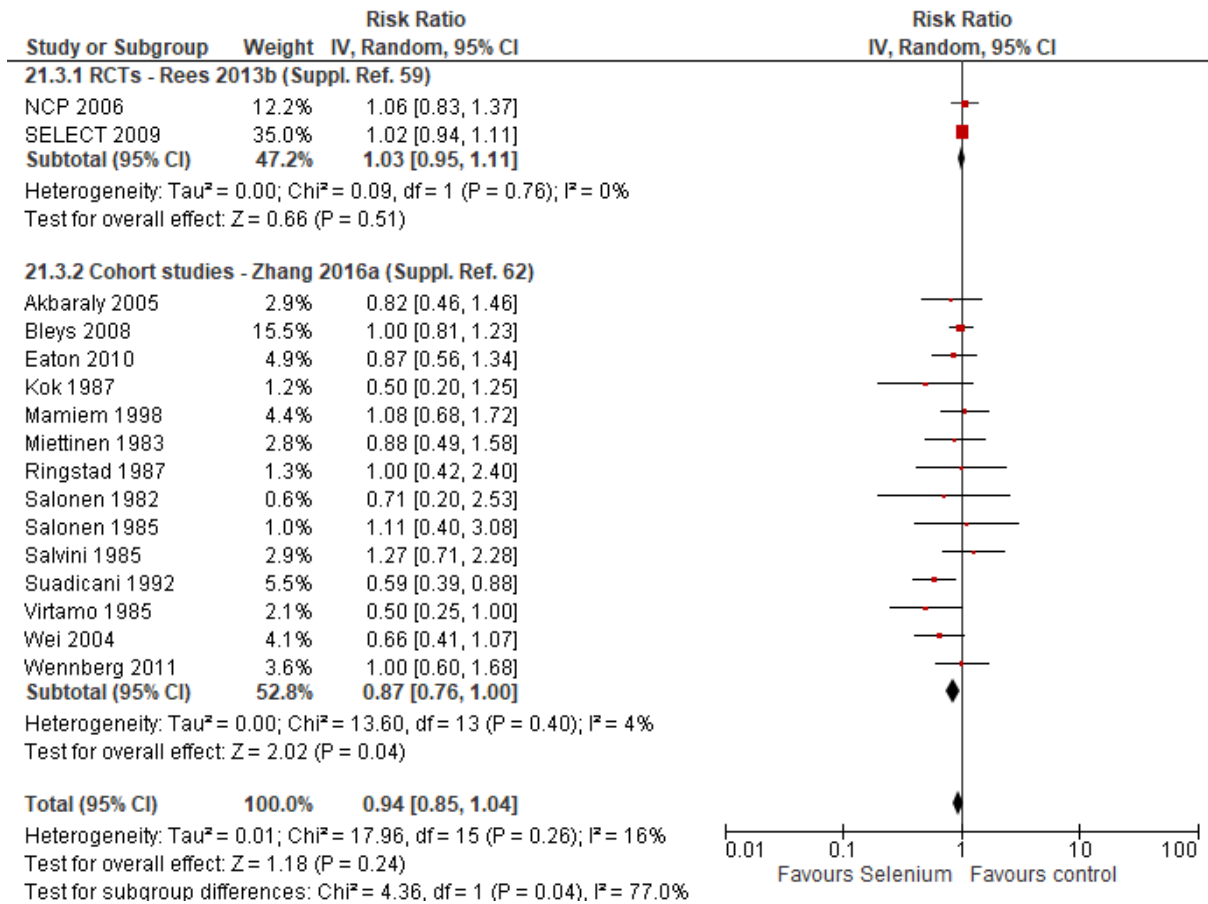

Supplementary Figure 63: Rees et al. 2013b (59) / Zhang et al. 2016a (62); Intervention/ Exposure: Selenium; Outcome: Combined cardiovascular events/ Cardiovascular disease

Supplemental data

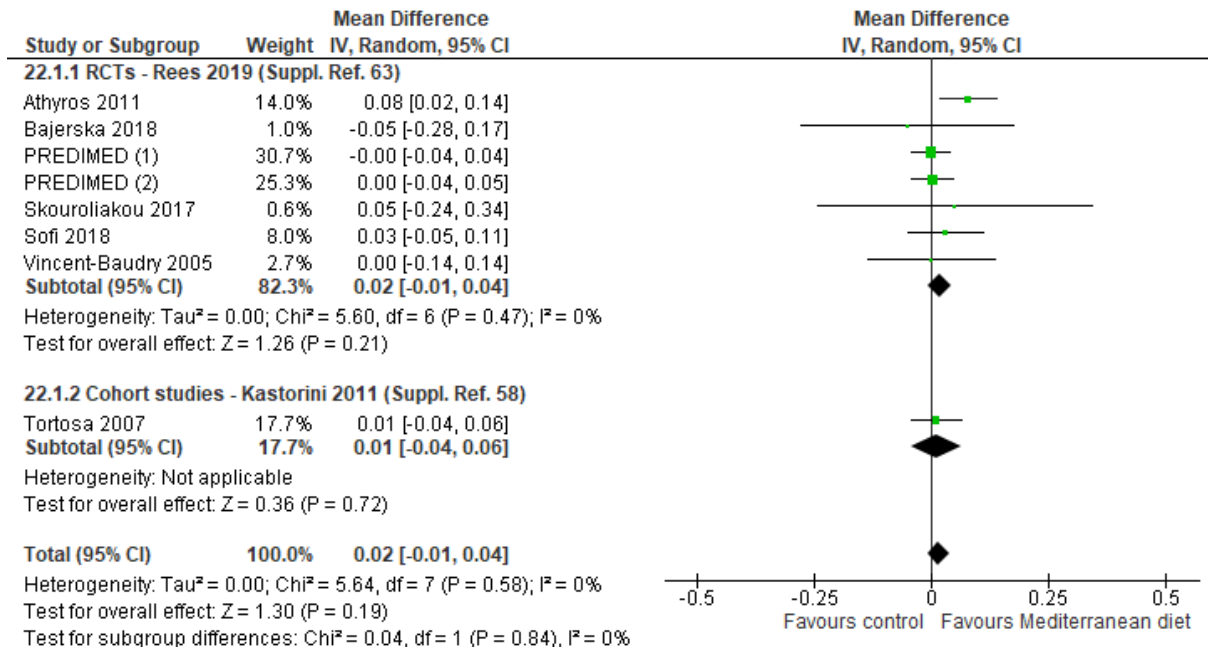

Supplementary Figure 64: Rees et al. 2019 (63) / Kastorini et al. 2011 (58); Intervention/ Exposure: Mediterranean diet; Outcome: High Density Lipoprotein (mmol/L)

Supplemental data

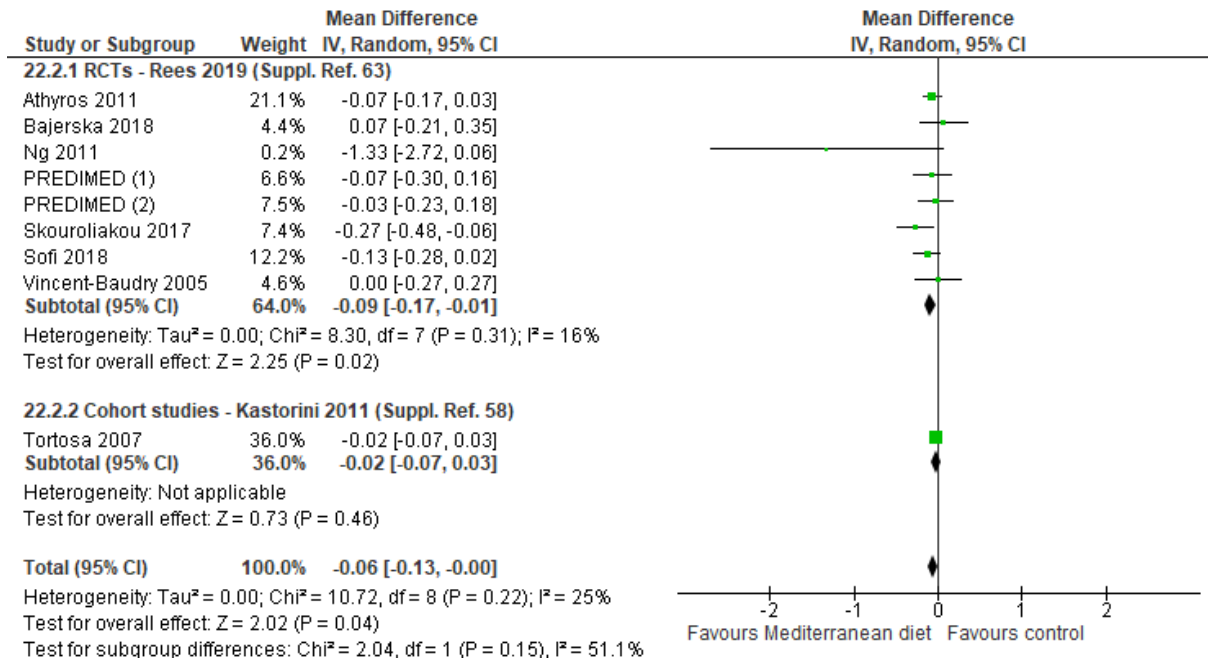

Supplementary Figure 65: Rees et al. 2019 (63) / Kastorini et al. 2011 (58); Intervention/ Exposure: Mediterranean diet; Outcome: Triglycerides (mmol/L)



Supplemental data

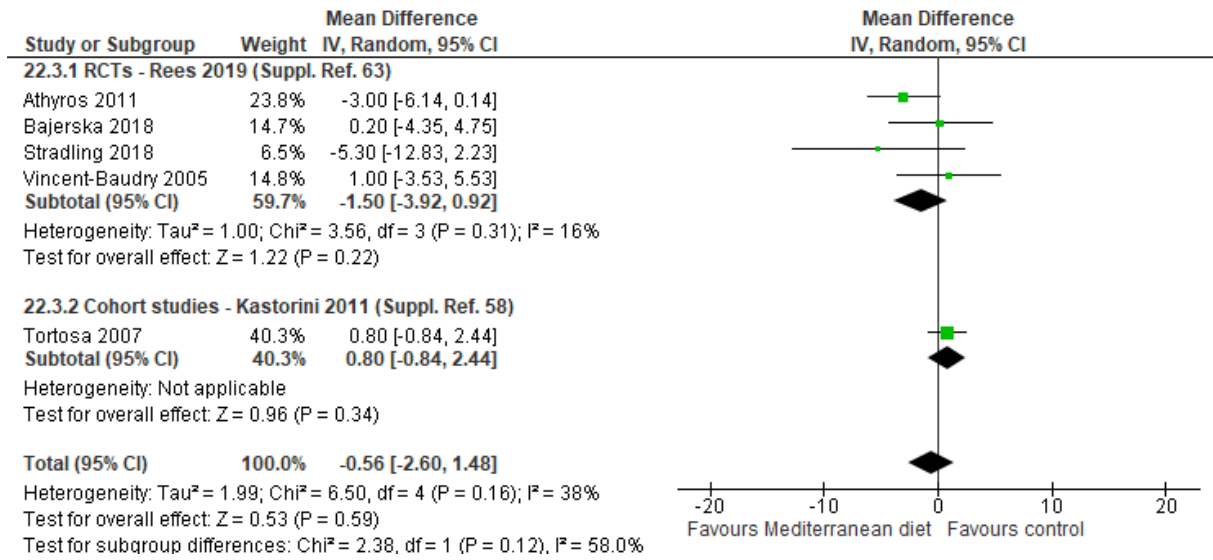

Supplementary Figure 66: Rees et al. 2019 (63) / Kastorini et al. 2011 (58); Intervention/ Exposure: Mediterranean diet; Outcome: Systolic blood pressure (mmHG)

Supplemental data

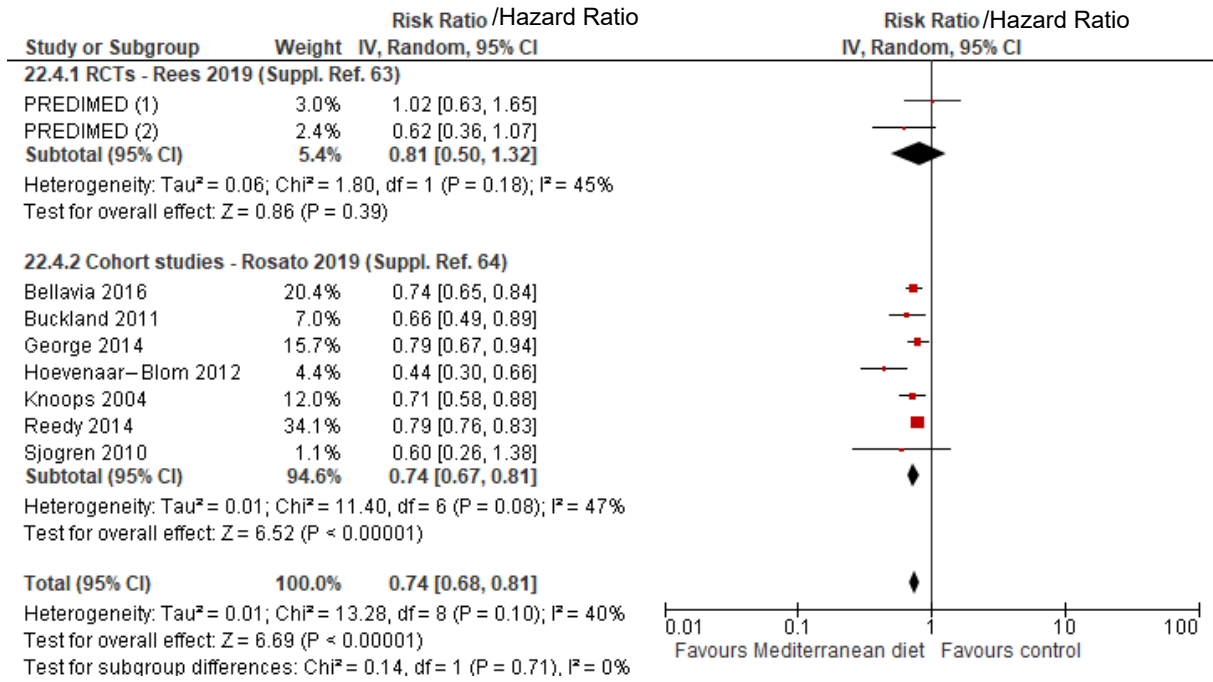

Supplementary Figure 67: Rees et al. 2019 (63) / Rosato et al. 2019 (64); Intervention/ Exposure: Mediterranean diet; Outcome: Cardiovascular mortality

Supplemental data

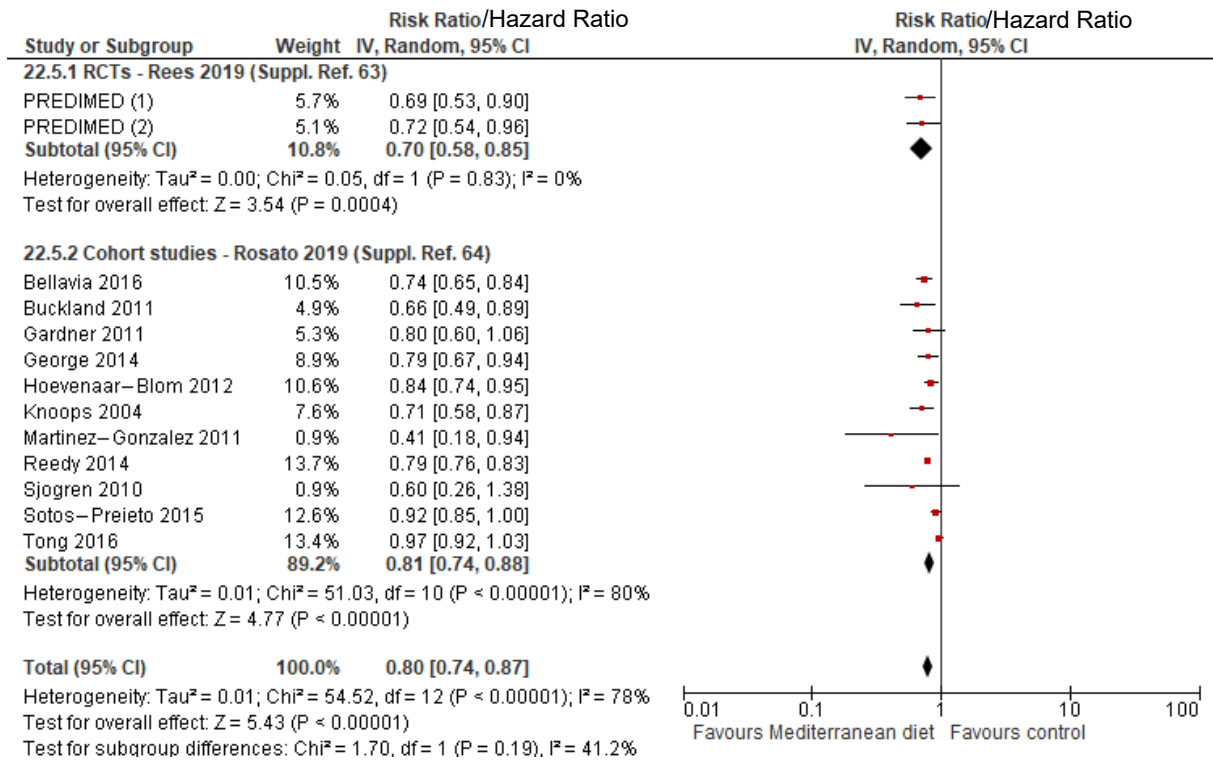

Supplementary Figure 68: Rees et al. 2019 (63) / Rosato et al. 2019 (64); Intervention/ Exposure: Mediterranean diet; Outcome: Combined cardiovascular events/ Cardiovascular disease

Supplemental data

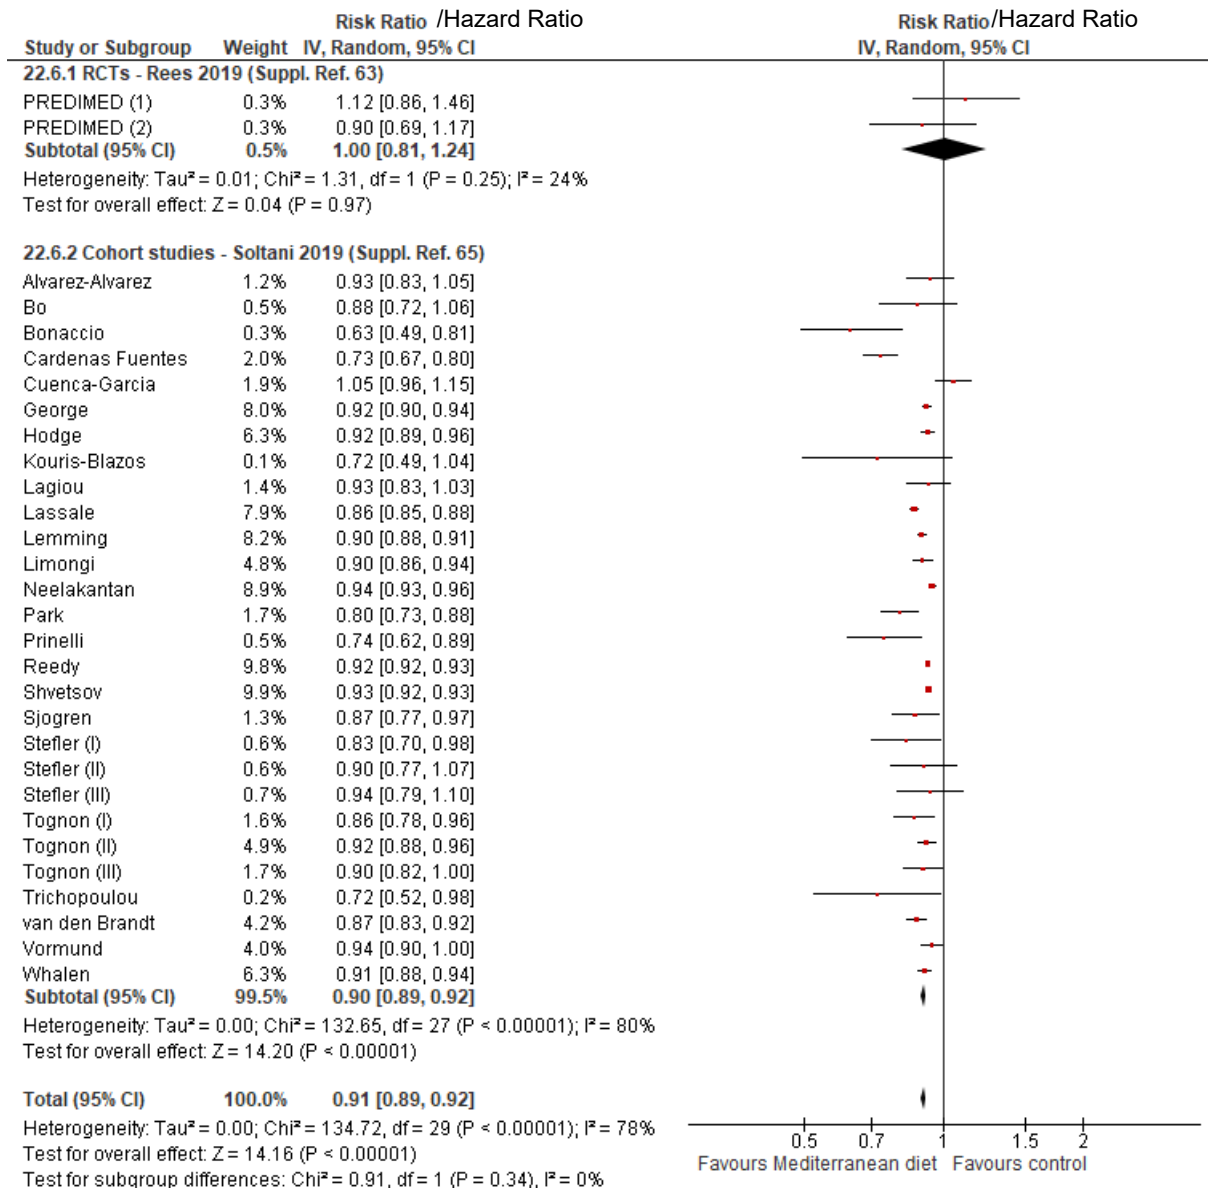

Supplementary Figure 69: Rees et al. 2019 (63) / Soltani et al. 2019 (65); Intervention/ Exposure: Mediterranean diet; Outcome: All-cause mortality

Supplemental data

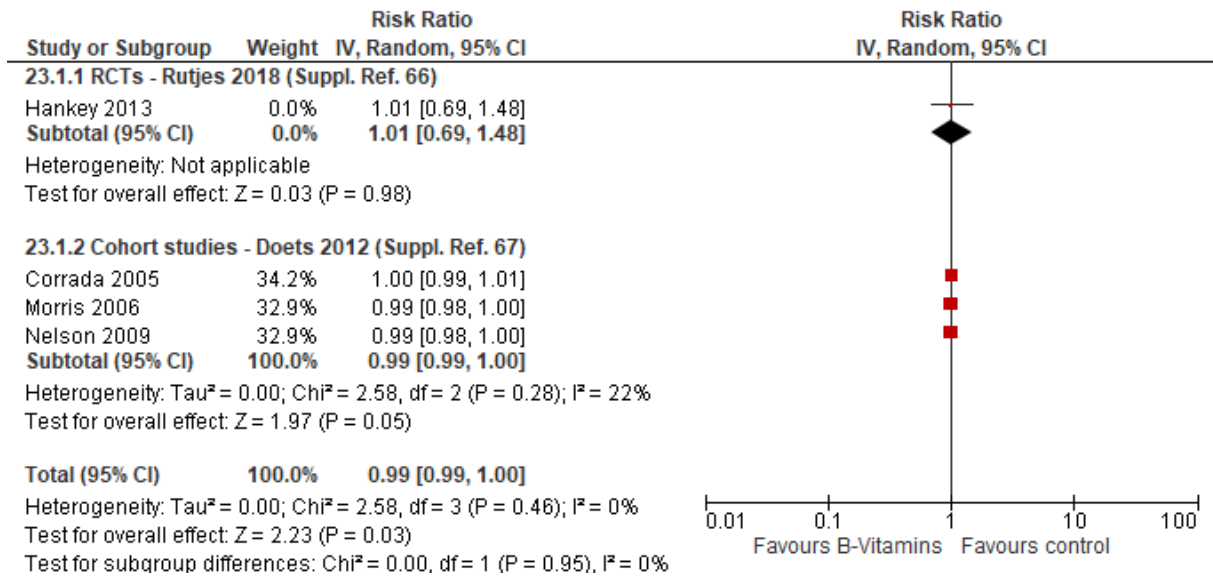

Supplementary Figure 70: Rutjes et al. 2018 (66) / Doets et al. 2013 (67); Intervention/ Exposure: B-vitamins/ Vitamin B12; Outcome: Dementia or MCI/ Dementia

Supplemental data

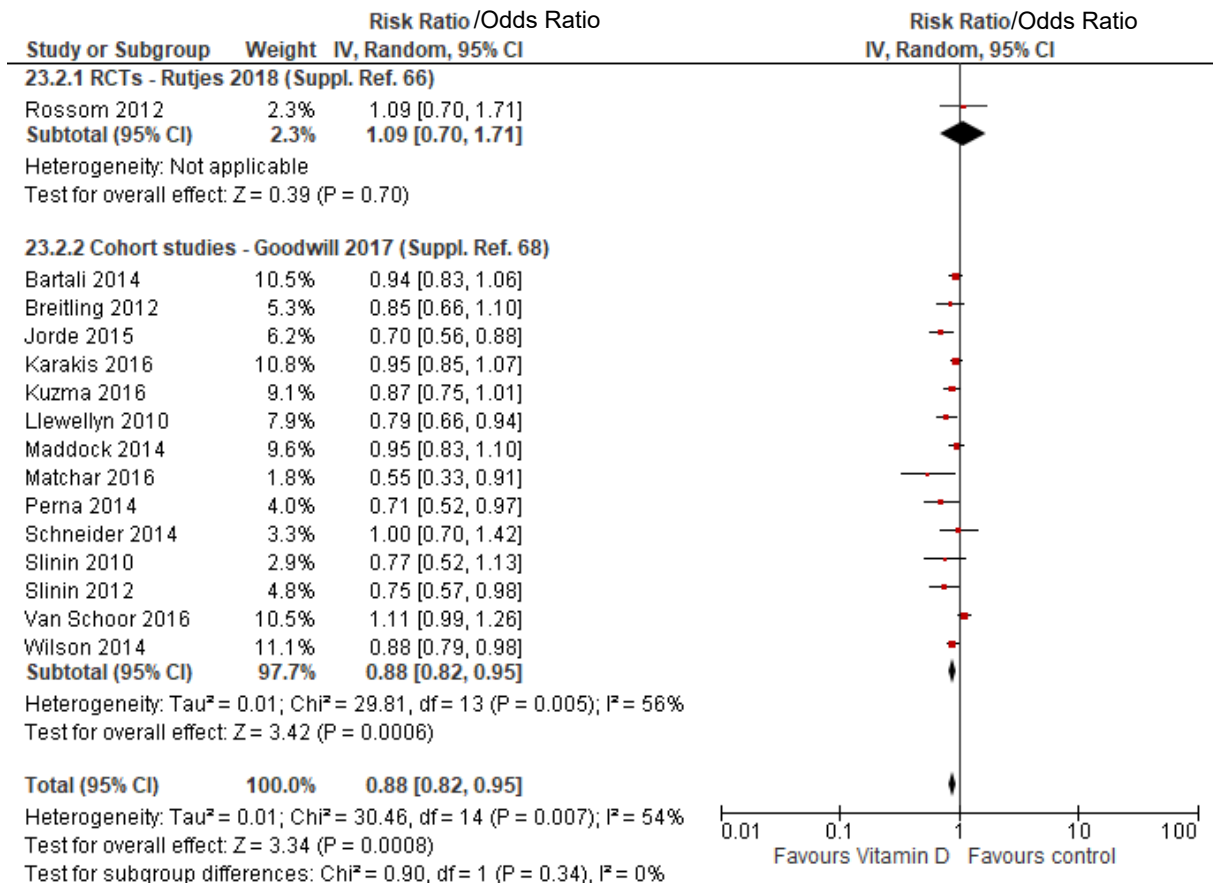

Supplementary Figure 71: Rutjes et al. 2018 (66) / Goodwill et al. 2017 (68); Intervention/ Exposure: Vitamin D3/ Vitamin D; Outcome: Dementia/ Dementia or MCI

Supplemental data

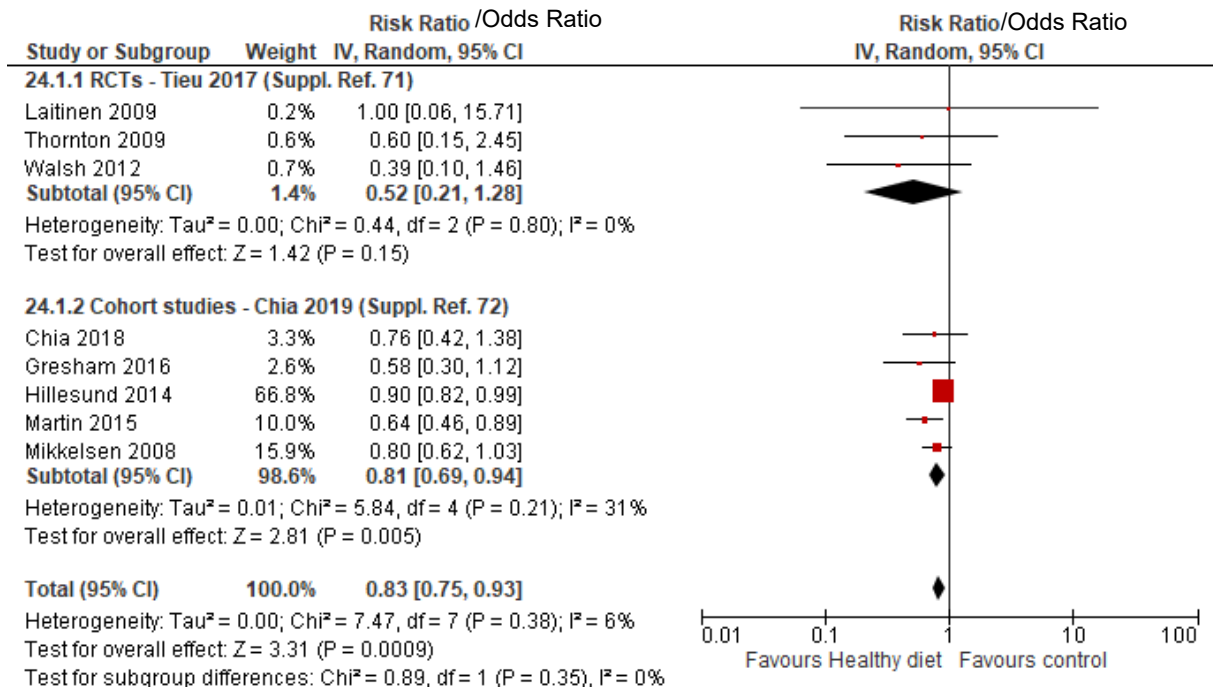

Supplementary Figure 72: Tieu et al. 2017 (71) / Chia et al. 2019 (72); Intervention/ Exposure: Healthy diet; Outcome: Preterm birth

Supplemental data

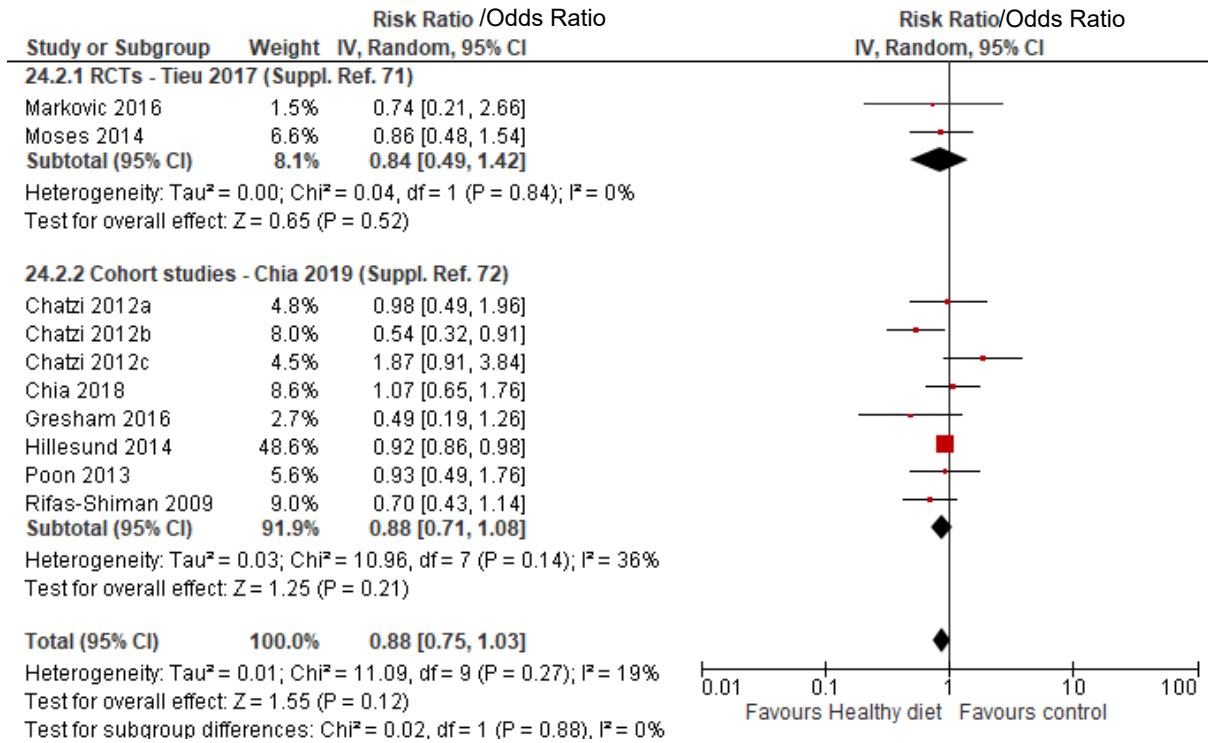

Supplementary Figure 73: Tieu et al. 2017 (71) / Chia et al. 2019 (72); Intervention/ Exposure: Healthy diet; Outcome: Small gestational age



Supplemental data

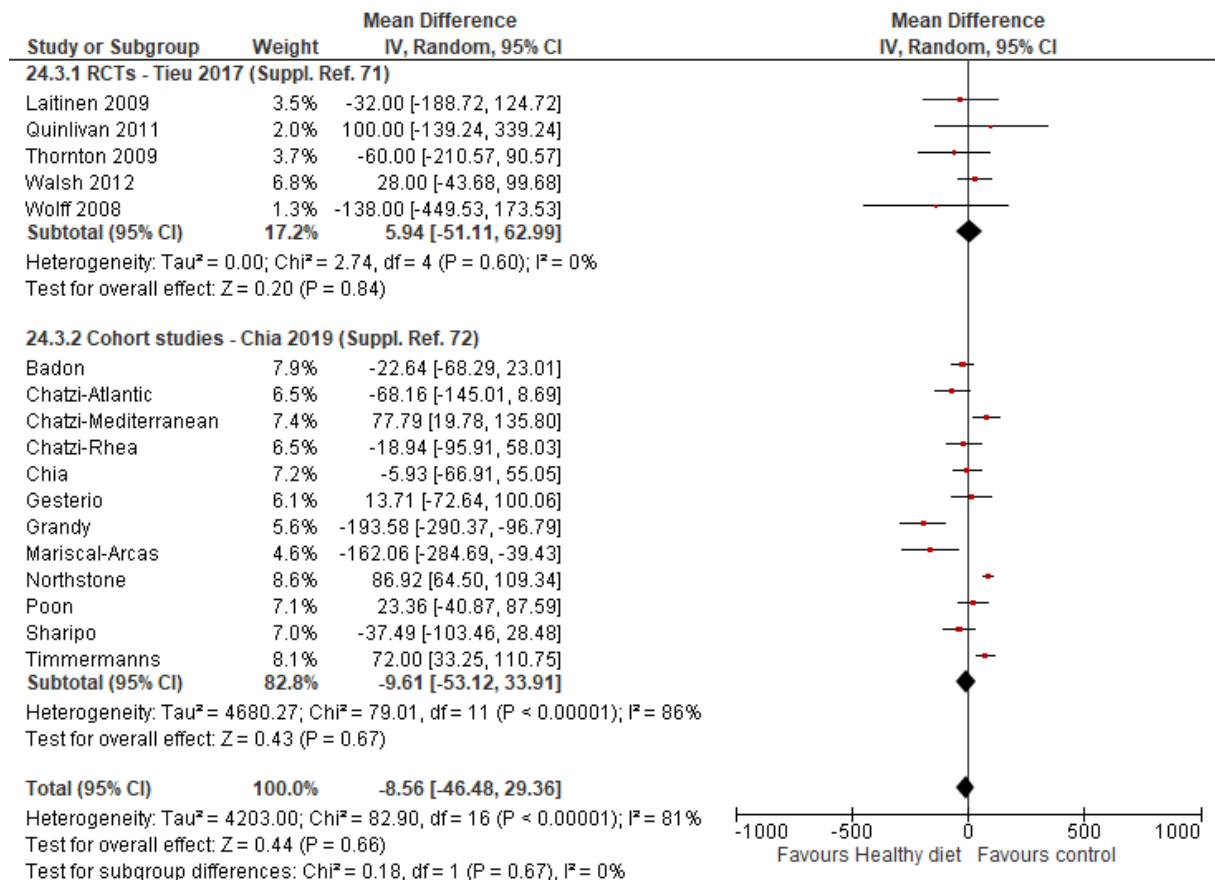

Supplementary Figure 74: Tieu et al. 2017 (71) / Chia et al. 2019 (72); Intervention/ Exposure: Healthy diet; Outcome: Birth weight (g)

Supplemental data

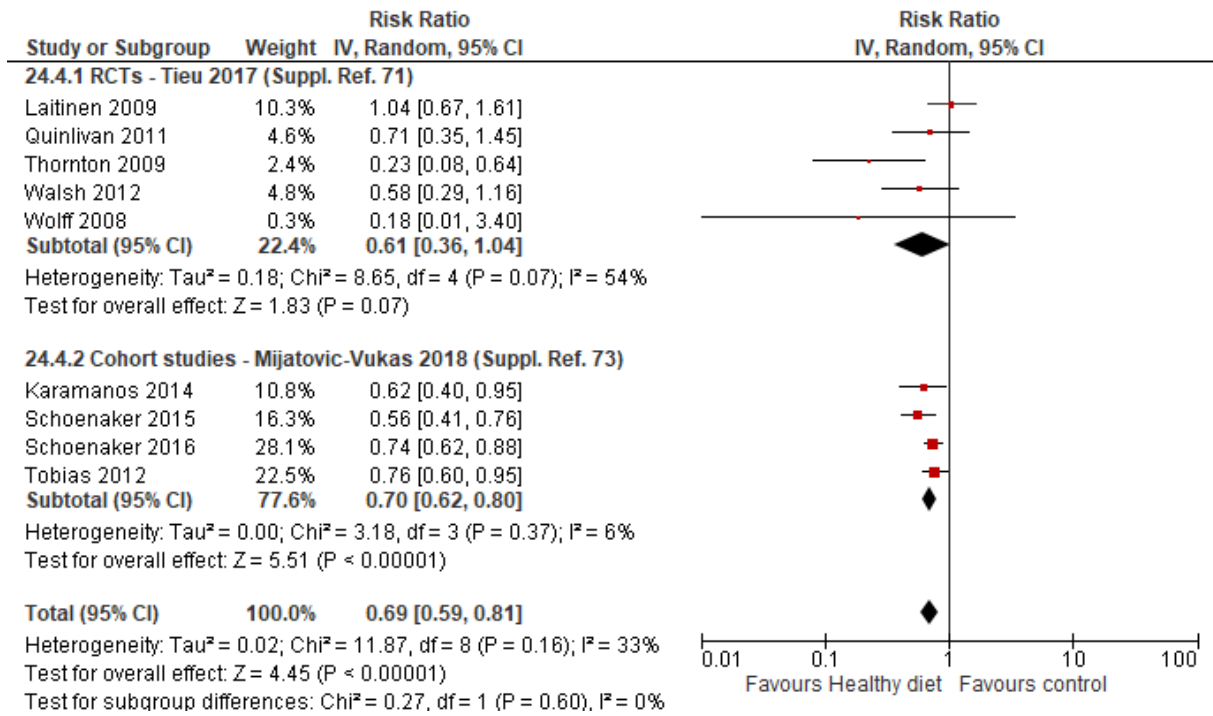

Supplementary Figure 75: Tieu et al. 2017 (71) / Mijatovic-Vukas et al. 2018 (73); Intervention/ Exposure: Healthy diet/ Mediterranean diet; Outcome: Gestational diabetes

Supplemental data

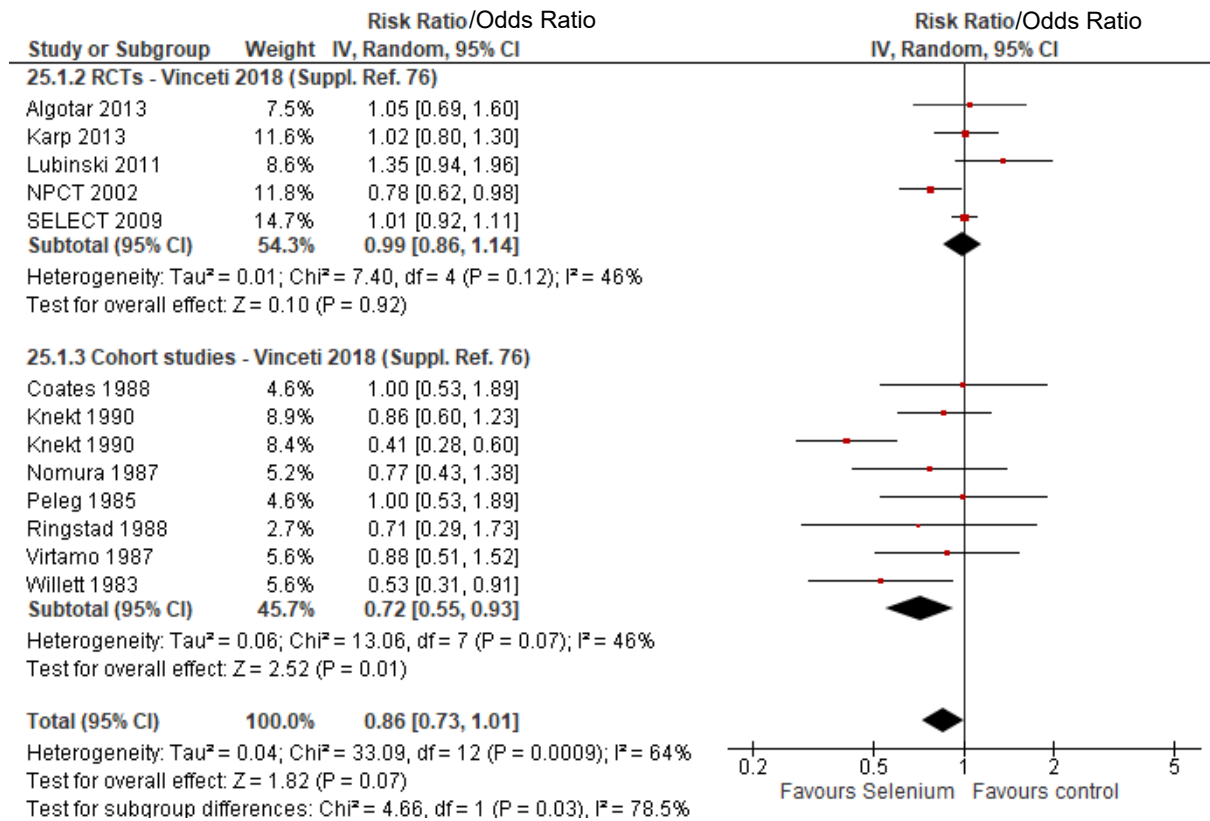

Supplementary Figure 76: Vinceti et al. 2018 (76) / Vinceti et al. 2018 (76); Intervention/ Exposure: Selenium; Outcome: Cancer

Supplemental data

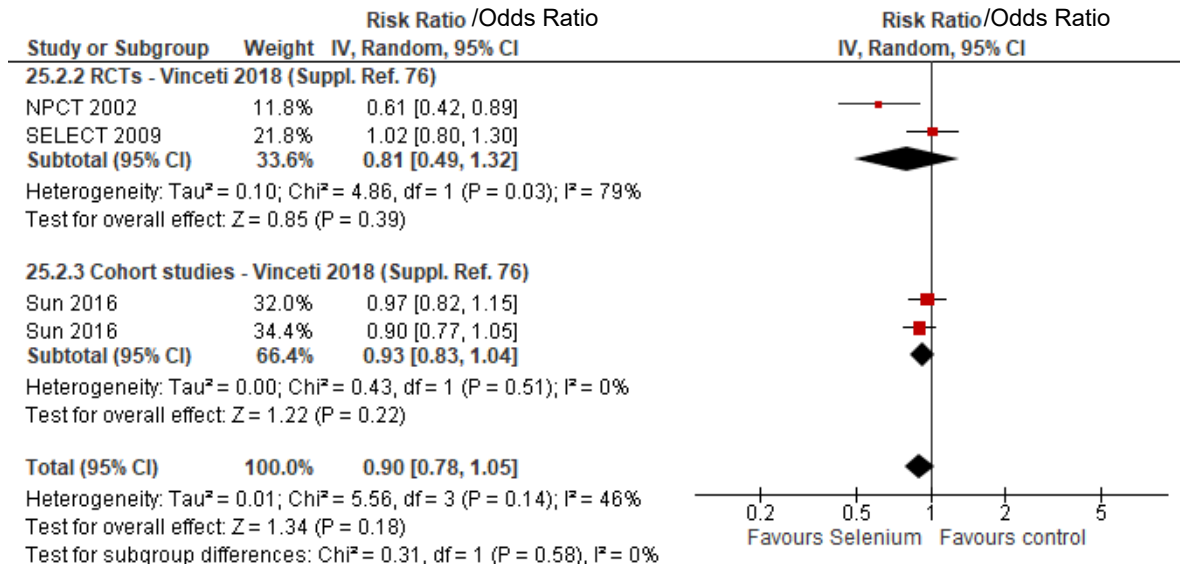

Supplementary Figure 77: Vinceti et al. 2018 (76) / Vinceti et al. 2018 (76); Intervention/ Exposure: Selenia; Outcome: Cancer mortality

Supplemental data

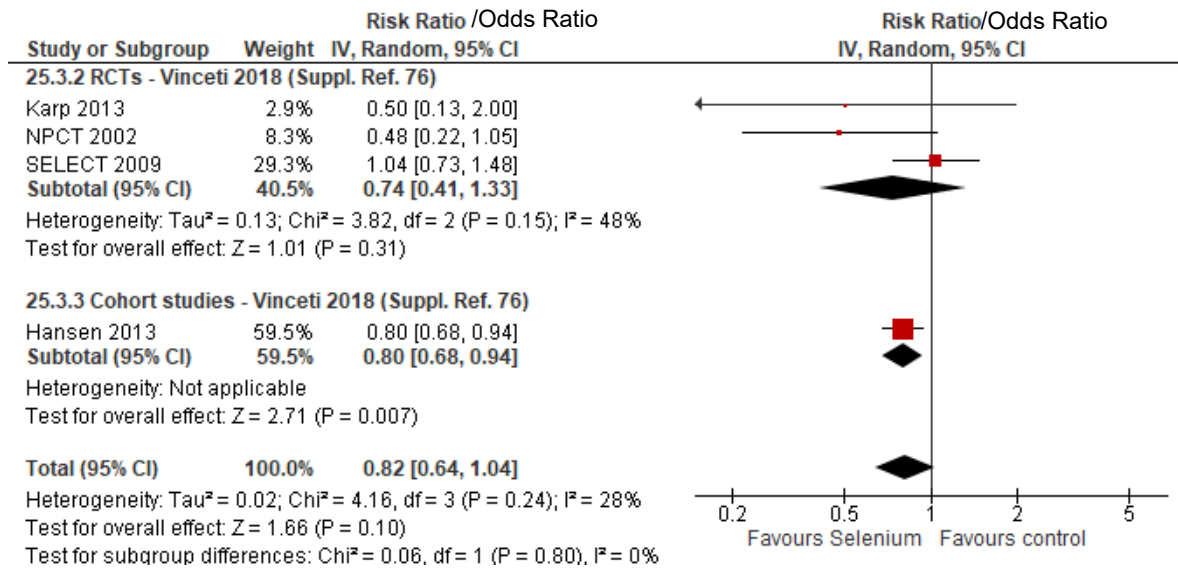

Supplementary Figure 78: Vinceti et al. 2018 (76) / Vinceti et al. 2018 (76); Intervention/ Exposure: Selenium; Outcome: Colorectal cancer

Supplemental data

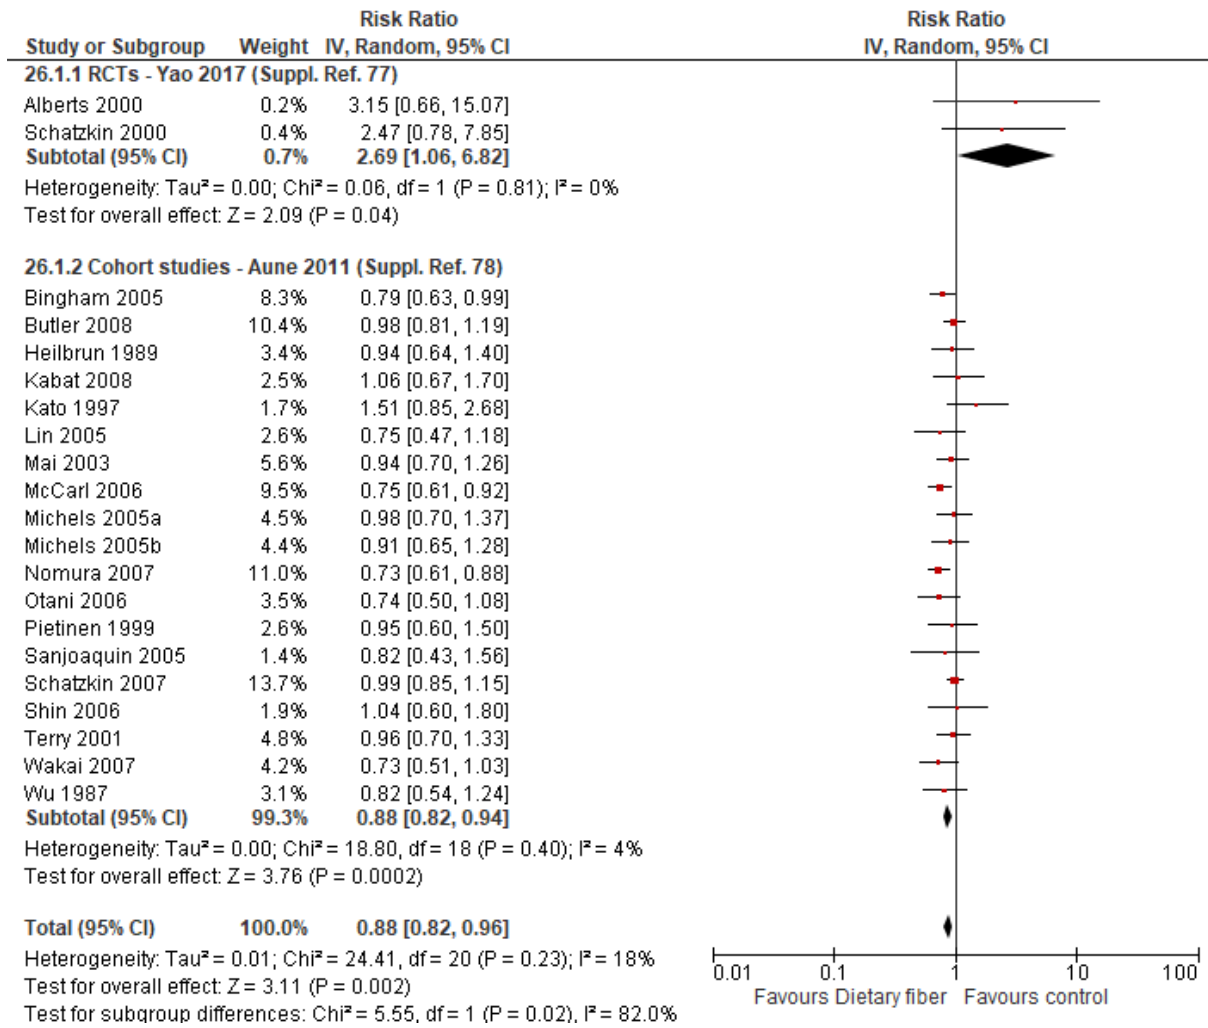

Supplementary Figure 79: Yao et al. 2017 (77) / Aune et al. 2011 (78); Intervention/ Exposure: Dietary fiber; Outcome: Colorectal cancer

Supplemental data

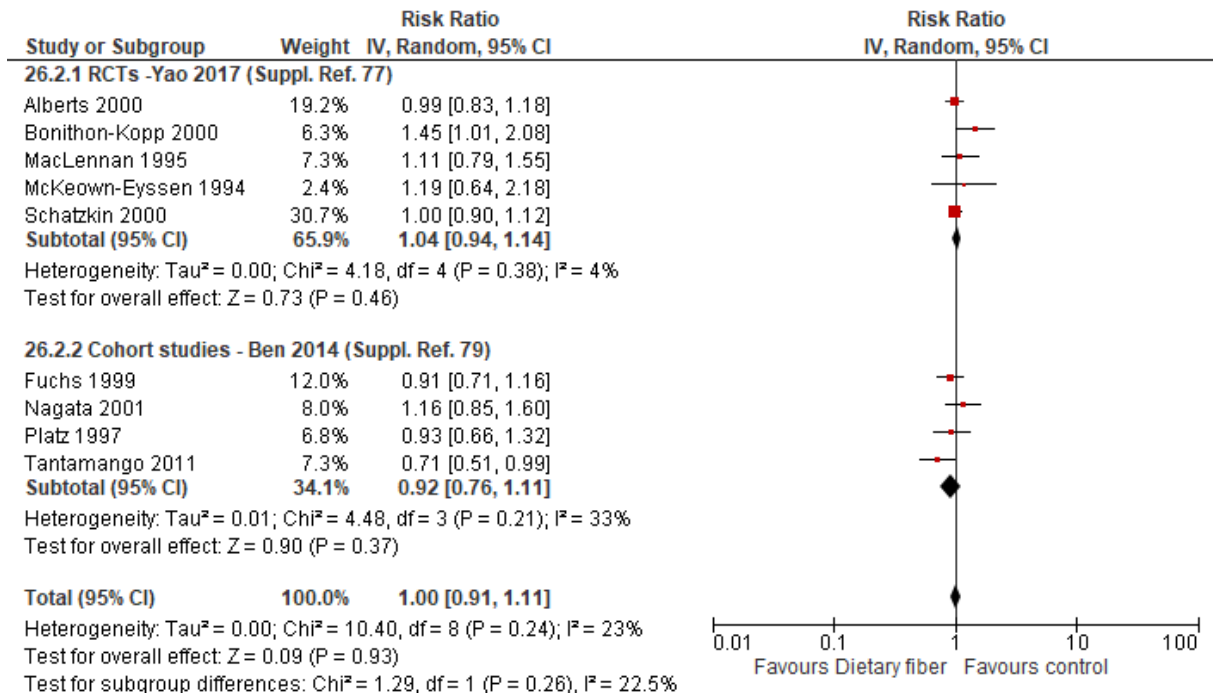

Supplementary Figure 80: Yao et al. 2017 (77) / Ben et al. 2014 (79); Intervention/ Exposure: Dietary fiber; Outcome: Colorectal adenoma

**Supplementary References**

1. Abdelhamid AS, Brown TJ, Brainard JS, Biswas P, Thorpe GC, Moore HJ, Deane KH, AlAbdulghafoor FK, Summerbell CD, Worthington HV, et al. Omega-3 fatty acids for the primary and secondary prevention of cardiovascular disease. *Cochrane Database Syst Rev* 2018a;11:Cd003177. doi: 10.1002/14651858.CD003177.pub4.
2. Chowdhury R, Warnakula S, Kunutsor S, Crowe F, Ward HA, Johnson L, Franco OH, Butterworth AS, Forouhi NG, Thompson SG, et al. Association of dietary, circulating, and supplement fatty acids with coronary risk: a systematic review and meta-analysis. *Ann Intern Med* 2014a;160(6):398-406. doi: 10.7326/m13-1788.
3. Pan A, Chen M, Chowdhury R, Wu JH, Sun Q, Campos H, Mozaffarian D, Hu FB. alpha-Linolenic acid and risk of cardiovascular disease: a systematic review and meta-analysis. *Am J Clin Nutr* 2012;96(6):1262-73. doi: 10.3945/ajcn.112.044040.
4. Schlesinger S, Neuenschwander M, Schwedhelm C, Hoffmann G, Bechthold A, Boeing H, Schwingshackl L. Food Groups and Risk of Overweight, Obesity, and Weight Gain: A Systematic Review and Dose-Response Meta-Analysis of Prospective Studies. *Adv Nutr* 2019;10(2):205-18. doi: 10.1093/advances/nmy092.
5. Wan Y, Zheng J, Wang F, Li D. Fish, long chain omega-3 polyunsaturated fatty acids consumption, and risk of all-cause mortality: a systematic review and dose-response meta-analysis from 23 independent prospective cohort studies. *Asia Pac J Clin Nutr* 2017;26(5):939-56. doi: 10.6133/apjcn.072017.01.
6. Wei J, Hou R, Xi Y, Kowalski A, Wang T, Yu Z, Hu Y, Chandrasekar EK, Sun H, Ali MK. The association and dose-response relationship between dietary intake of alpha-linolenic acid and risk of CHD: a systematic review and meta-analysis of cohort studies. *Br J Nutr* 2018;119(1):83-9. doi: 10.1017/s0007114517003294.
7. Abdelhamid AS, Martin N, Bridges C, Brainard JS, Wang X, Brown TJ, Hanson S, Jimoh OF, Ajabnoor SM, Deane KH, et al. Polyunsaturated fatty acids for the primary and secondary prevention of cardiovascular disease. *Cochrane Database Syst Rev* 2018b;11:Cd012345. doi: 10.1002/14651858.CD012345.pub3.
8. Li J, Guasch-Ferre M, Li Y, Hu FB. Dietary intake and biomarkers of linoleic acid and mortality: systematic review and meta-analysis of prospective cohort studies. *Am J Clin Nutr* 2020. doi: 10.1093/ajcn/nqz349.
9. Zhu Y, Bo Y, Liu Y. Dietary total fat, fatty acids intake, and risk of cardiovascular disease: a dose-response meta-analysis of cohort studies. *Lipids Health Dis* 2019;18(1):91. doi: 10.1186/s12944-019-1035-2.
10. Adler AJ, Taylor F, Martin N, Gottlieb S, Taylor RS, Ebrahim S. Reduced dietary salt for the prevention of cardiovascular disease. *Cochrane Database Syst Rev* 2014(12):Cd009217. doi: 10.1002/14651858.CD009217.pub3.



## Supplemental data

11. Aburto NJ, Ziolkovska A, Hooper L, Elliott P, Cappuccio FP, Meerpohl JJ. Effect of lower sodium intake on health: systematic review and meta-analyses. *Bmj* 2013;346:f1326. doi: 10.1136/bmj.f1326.
12. Leyvraz M, Chatelan A, da Costa BR, Taffe P, Paradis G, Bovet P, Bochud M, Chiolero A. Sodium intake and blood pressure in children and adolescents: a systematic review and meta-analysis of experimental and observational studies. *Int J Epidemiol* 2018;47(6):1796-810. doi: 10.1093/ije/dyy121.
13. Al-Khudairy L, Flowers N, Wheelhouse R, Ghannam O, Hartley L, Stranges S, Rees K. Vitamin C supplementation for the primary prevention of cardiovascular disease. *Cochrane Database Syst Rev* 2017;3:CD011114. doi: 10.1002/14651858.CD011114.pub2.
14. Aune D, Keum N, Giovannucci E, Fadnes LT, Boffetta P, Greenwood DC, Tonstad S, Vatten LJ, Riboli E, Norat T. Dietary intake and blood concentrations of antioxidants and the risk of cardiovascular disease, total cancer, and all-cause mortality: a systematic review and dose-response meta-analysis of prospective studies. *Am J Clin Nutr* 2018;108(5):1069-91. doi: 10.1093/ajcn/nqy097.
15. Avenell A, Mak JC, O'Connell D. Vitamin D and vitamin D analogues for preventing fractures in post-menopausal women and older men. *Cochrane Database Syst Rev* 2014(4):Cd000227. doi: 10.1002/14651858.CD000227.pub4.
16. Feng Y, Cheng G, Wang H, Chen B. The associations between serum 25-hydroxyvitamin D level and the risk of total fracture and hip fracture. *Osteoporos Int* 2017;28(5):1641-52. doi: 10.1007/s00198-017-3955-x.
17. Bjelakovic G, Nikolova D, Gluud LL, Simonetti RG, Gluud C. Antioxidant supplements for prevention of mortality in healthy participants and patients with various diseases. *Cochrane Database Syst Rev* 2012(3):Cd007176. doi: 10.1002/14651858.CD007176.pub2.
18. Bjelakovic G, Gluud LL, Nikolova D, Whitfield K, Wetterslev J, Simonetti RG, Bjelakovic M, Gluud C. Vitamin D supplementation for prevention of mortality in adults. *Cochrane Database Syst Rev* 2014a(1):Cd007470. doi: 10.1002/14651858.CD007470.pub3.
19. Chowdhury R, Kunutsor S, Vitezova A, Oliver-Williams C, Chowdhury S, Kieft-de-Jong JC, Khan H, Baena CP, Prabhakaran D, Hoshen MB, et al. Vitamin D and risk of cause specific death: systematic review and meta-analysis of observational cohort and randomised intervention studies. *Bmj* 2014b;348:g1903. doi: 10.1136/bmj.g1903.
20. Han J, Guo X, Yu X, Liu S, Cui X, Zhang B, Liang H. 25-Hydroxyvitamin D and Total Cancer Incidence and Mortality: A Meta-Analysis of Prospective Cohort Studies. *Nutrients* 2019;11(10). doi: 10.3390/nu11102295.
21. Bjelakovic G, Gluud LL, Nikolova D, Whitfield K, Krstic G, Wetterslev J, Gluud C. Vitamin D supplementation for prevention of cancer in adults. *Cochrane Database Syst Rev* 2014b(6):Cd007469. doi: 10.1002/14651858.CD007469.pub2.
22. Hossain S, Beydoun MA, Beydoun HA, Chen X, Zonderman AB, Wood RJ. Vitamin D and breast cancer: A systematic review and meta-analysis of observational studies. *Clin Nutr ESPEN* 2019;30:170-84. doi: 10.1016/j.clnesp.2018.12.085.

## Supplemental data

23. Zhang L, Wang S, Che X, Li X. Vitamin D and lung cancer risk: a comprehensive review and meta-analysis. *Cell Physiol Biochem* 2015;36(1):299-305. doi: 10.1159/000374072.
24. Cormick G, Ciapponi A, Cafferata ML, Belizan JM. Calcium supplementation for prevention of primary hypertension. *Cochrane Database Syst Rev* 2015(6):Cd010037. doi: 10.1002/14651858.CD010037.pub2.
25. Jayedi A, Zargar MS. Dietary calcium intake and hypertension risk: a dose-response meta-analysis of prospective cohort studies. *Eur J Clin Nutr* 2019;73(7):969-78. doi: 10.1038/s41430-018-0275-y.
26. De-Regil LM, Peña-Rosas JP, Fernández-Gaxiola AC, Rayco-Solon P. Effects and safety of periconceptional oral folate supplementation for preventing birth defects. *Cochrane Database of Systematic Reviews* 2015(12). doi: 10.1002/14651858.CD007950.pub3.
27. Blencowe H, Cousens S, Modell B, Lawn J. Folic acid to reduce neonatal mortality from neural tube disorders. *Int J Epidemiol* 2010;39 Suppl 1:i110-21. doi: 10.1093/ije/dyq028.
28. Feng Y, Wang S, Chen R, Tong X, Wu Z, Mo X. Maternal folic acid supplementation and the risk of congenital heart defects in offspring: a meta-analysis of epidemiological observational studies. *Sci Rep* 2015;5:8506. doi: 10.1038/srep08506.
29. El Dib R, Gameiro OL, Ogata MS, Modolo NS, Braz LG, Jorge EC, do Nascimento P, Jr., Beletate V. Zinc supplementation for the prevention of type 2 diabetes mellitus in adults with insulin resistance. *Cochrane Database Syst Rev* 2015(5):Cd005525. doi: 10.1002/14651858.CD005525.pub3.
30. Fernandez-Cao JC, Warthon-Medina M, V HM, Arija V, Doepking C, Serra-Majem L, Lowe NM. Zinc Intake and Status and Risk of Type 2 Diabetes Mellitus: A Systematic Review and Meta-Analysis. *Nutrients* 2019;11(5). doi: 10.3390/nu11051027.
31. Hartley L, Igbinedion E, Holmes J, Flowers N, Thorogood M, Clarke A, Stranges S, Hooper L, Rees K. Increased consumption of fruit and vegetables for the primary prevention of cardiovascular diseases. *Cochrane Database Syst Rev* 2013(6):Cd009874. doi: 10.1002/14651858.CD009874.pub2.
32. Schwingshackl L, Schwedhelm C, Hoffmann G, Knuppel S, Iqbal K, Andriolo V, Bechthold A, Schlesinger S, Boeing H. Food Groups and Risk of Hypertension: A Systematic Review and Dose-Response Meta-Analysis of Prospective Studies. *Adv Nutr* 2017;8(6):793-803. doi: 10.3945/an.117.017178.
33. Hartley L, May MD, Loveman E, Colquitt JL, Rees K. Dietary fibre for the primary prevention of cardiovascular disease. *Cochrane Database Syst Rev* 2016(1):Cd011472. doi: 10.1002/14651858.CD011472.pub2.
34. Hemmingsen B, Gimenez-Perez G, Mauricio D, Roque IFM, Metzendorf MI, Richter B. Diet, physical activity or both for prevention or delay of type 2 diabetes mellitus and its associated complications in people at increased risk of developing type 2 diabetes mellitus. *Cochrane Database Syst Rev* 2017;12:Cd003054. doi: 10.1002/14651858.CD003054.pub4.

## Supplemental data

35. Schwingshackl L, Bogensberger B, Hoffmann G. Diet Quality as Assessed by the Healthy Eating Index, Alternate Healthy Eating Index, Dietary Approaches to Stop Hypertension Score, and Health Outcomes: An Updated Systematic Review and Meta-Analysis of Cohort Studies. *J Acad Nutr Diet* 2018;118(1):74-100.e11. doi: 10.1016/j.jand.2017.08.024.
36. Hofmeyr GJ, Lawrie TA, Atallah AN, Torloni MR. Calcium supplementation during pregnancy for preventing hypertensive disorders and related problems. *Cochrane Database Syst Rev* 2018;10:CD001059. doi: 10.1002/14651858.CD001059.pub5.
37. Newberry SJ, Chung M, Shekelle PG, Booth MS, Liu JL, Maher AR, Motala A, Cui M, Perry T, Shanman R, et al. Vitamin D and Calcium: A Systematic Review of Health Outcomes (Update). *Evid Rep Technol Assess (Full Rep)* 2014(217):1-929. doi: 10.23970/ahrqepcerta217.
38. Hooper L, Summerbell CD, Thompson R, Sills D, Roberts FG, Moore HJ, Davey Smith G. Reduced or modified dietary fat for preventing cardiovascular disease. *Cochrane Database Syst Rev* 2012(5):Cd002137. doi: 10.1002/14651858.CD002137.pub3.
39. Noto H, Goto A, Tsujimoto T, Noda M. Low-carbohydrate diets and all-cause mortality: a systematic review and meta-analysis of observational studies. *PLoS One* 2013;8(1):e55030. doi: 10.1371/journal.pone.0055030.
40. Seidelmann SB, Claggett B, Cheng S, Henglin M, Shah A, Steffen LM, Folsom AR, Rimm EB, Willett WC, Solomon SD. Dietary carbohydrate intake and mortality: a prospective cohort study and meta-analysis. *Lancet Public Health* 2018;3(9):e419-e28. doi: 10.1016/s2468-2667(18)30135-x.
41. Sartorius K, Sartorius B, Madiba TE, Stefan C. Does high-carbohydrate intake lead to increased risk of obesity? A systematic review and meta-analysis. *BMJ Open* 2018;8(2):e018449. doi: 10.1136/bmjopen-2017-018449.
42. Hooper L, Abdelhamid A, Bunn D, Brown T, Summerbell CD, Skeaff CM. Effects of total fat intake on body weight. *Cochrane Database Syst Rev* 2015a(8):Cd011834. doi: 10.1002/14651858.Cd011834.
43. Hooper L, Martin N, Abdelhamid A, Davey Smith G. Reduction in saturated fat intake for cardiovascular disease. *Cochrane Database Syst Rev* 2015b(6):Cd011737. doi: 10.1002/14651858.Cd011737.
44. de Souza RJ, Mente A, Maroleanu A, Cozma AI, Ha V, Kishibe T, Uleryk E, Budyłowski P, Schunemann H, Beyene J, et al. Intake of saturated and trans unsaturated fatty acids and risk of all cause mortality, cardiovascular disease, and type 2 diabetes: systematic review and meta-analysis of observational studies. *Bmj* 2015;351:h3978. doi: 10.1136/bmj.h3978.
45. Hooper L, Al-Khudairy L, Abdelhamid AS, Rees K, Brainard JS, Brown TJ, Ajabnoor SM, O'Brien AT, Winstanley LE, Donaldson DH, et al. Omega-6 fats for the primary and secondary prevention of cardiovascular disease. *Cochrane Database Syst Rev* 2018;11:CD011094. doi: 10.1002/14651858.CD011094.pub4.
46. Jin H, Leng Q, Li C. Dietary flavonoid for preventing colorectal neoplasms. *Cochrane Database Syst Rev* 2012(8):Cd009350. doi: 10.1002/14651858.CD009350.pub2.

Supplemental data

47. Keats EC, Haider BA, Tam E, Bhutta ZA. Multiple-micronutrient supplementation for women during pregnancy. *Cochrane Database Syst Rev* 2019;3:Cd004905. doi: 10.1002/14651858.CD004905.pub6.
48. Wolf HT, Hegaard HK, Huusom LD, Pinborg AB. Multivitamin use and adverse birth outcomes in high-income countries: a systematic review and meta-analysis. *Am J Obstet Gynecol* 2017;217(4):404.e1-.e30. doi: 10.1016/j.ajog.2017.03.029.
49. Kelly SA, Hartley L, Loveman E, Colquitt JL, Jones HM, Al-Khudairy L, Clar C, Germano R, Lunn HR, Frost G, et al. Whole grain cereals for the primary or secondary prevention of cardiovascular disease. *Cochrane Database Syst Rev* 2017;8:Cd005051. doi: 10.1002/14651858.CD005051.pub3.
50. Ye EQ, Chacko SA, Chou EL, Kugizaki M, Liu S. Greater whole-grain intake is associated with lower risk of type 2 diabetes, cardiovascular disease, and weight gain. *J Nutr* 2012;142(7):1304-13. doi: 10.3945/jn.111.155325.
51. Mathew MC, Ervin AM, Tao J, Davis RM. Antioxidant vitamin supplementation for preventing and slowing the progression of age-related cataract. *Cochrane Database Syst Rev* 2012(6):Cd004567. doi: 10.1002/14651858.CD004567.pub2.
52. Jiang H, Yin Y, Wu CR, Liu Y, Guo F, Li M, Ma L. Dietary vitamin and carotenoid intake and risk of age-related cataract. *Am J Clin Nutr* 2019;109(1):43-54. doi: 10.1093/ajcn/nqy270.
53. Palacios C, Trak-Fellermeier MA, Martinez RX, Lopez-Perez L, Lips P, Salisi JA, John JC, Pena-Rosas JP. Regimens of vitamin D supplementation for women during pregnancy. *Cochrane Database Syst Rev* 2019;10:Cd013446. doi: 10.1002/14651858.Cd013446.
54. Hu L, Zhang Y, Wang X, You L, Xu P, Cui X, Zhu L, Ji C, Guo X, Wen J. Maternal Vitamin D Status and Risk of Gestational Diabetes: a Meta-Analysis. *Cell Physiol Biochem* 2018;45(1):291-300. doi: 10.1159/000486810.
55. Tous M, Villalobos M, Iglesias L, Fernandez-Barres S, Arija V. Vitamin D status during pregnancy and offspring outcomes: a systematic review and meta-analysis of observational studies. *Eur J Clin Nutr* 2020;74(1):36-53. doi: 10.1038/s41430-018-0373-x.
56. Yuan Y, Tai W, Xu P, Fu Z, Wang X, Long W, Guo X, Ji C, Zhang L, Zhang Y, et al. Association of maternal serum 25-hydroxyvitamin D concentrations with risk of preeclampsia: a nested case-control study and meta-analysis. *J Matern Fetal Neonatal Med* 2019:1-10. doi: 10.1080/14767058.2019.1640675.
57. Rees K, Dyakova M, Wilson N, Ward K, Thorogood M, Brunner E. Dietary advice for reducing cardiovascular risk. *Cochrane Database Syst Rev* 2013a(12):Cd002128. doi: 10.1002/14651858.CD002128.pub5.
58. Kastorini CM, Milionis HJ, Esposito K, Giugliano D, Goudevenos JA, Panagiotakos DB. The effect of Mediterranean diet on metabolic syndrome and its components: a meta-analysis of 50 studies and 534,906 individuals. *J Am Coll Cardiol* 2011;57(11):1299-313. doi: 10.1016/j.jacc.2010.09.073.

## Supplemental data

59. Rees K, Hartley L, Day C, Flowers N, Clarke A, Stranges S. Selenium supplementation for the primary prevention of cardiovascular disease. *Cochrane Database Syst Rev* 2013b(1):Cd009671. doi: 10.1002/14651858.CD009671.pub2.
60. Jayedi A, Rashidy-Pour A, Parohan M, Zargar MS, Shab-Bidar S. Dietary Antioxidants, Circulating Antioxidant Concentrations, Total Antioxidant Capacity, and Risk of All-Cause Mortality: A Systematic Review and Dose-Response Meta-Analysis of Prospective Observational Studies. *Adv Nutr* 2018;9(6):701-16. doi: 10.1093/advances/nmy040.
61. Xiang S, Dai Z, Man C, Fan Y. Circulating Selenium and Cardiovascular or All-Cause Mortality in the General Population: a Meta-Analysis. *Biol Trace Elem Res* 2019. doi: 10.1007/s12011-019-01847-8.
62. Zhang X, Liu C, Guo J, Song Y. Selenium status and cardiovascular diseases: meta-analysis of prospective observational studies and randomized controlled trials. *Eur J Clin Nutr* 2016a;70(2):162-9. doi: 10.1038/ejcn.2015.78.
63. Rees K, Takeda A, Martin N, Ellis L, Wijesekara D, Vepa A, Das A, Hartley L, Stranges S. Mediterranean-style diet for the primary and secondary prevention of cardiovascular disease. *Cochrane Database Syst Rev* 2019;3:Cd009825. doi: 10.1002/14651858.CD009825.pub3.
64. Rosato V, Temple NJ, La Vecchia C, Castellan G, Tavani A, Guercio V. Mediterranean diet and cardiovascular disease: a systematic review and meta-analysis of observational studies. *Eur J Nutr* 2019;58(1):173-91. doi: 10.1007/s00394-017-1582-0.
65. Soltani S, Jayedi A, Shab-Bidar S, Becerra-Tomas N, Salas-Salvado J. Adherence to the Mediterranean Diet in Relation to All-Cause Mortality: A Systematic Review and Dose-Response Meta-Analysis of Prospective Cohort Studies. *Adv Nutr* 2019;10(6):1029-39. doi: 10.1093/advances/nmz041.
66. Rutjes AW, Denton DA, Di Nisio M, Chong LY, Abraham RP, Al-Assaf AS, Anderson JL, Malik MA, Vernooij RW, Martinez G, et al. Vitamin and mineral supplementation for maintaining cognitive function in cognitively healthy people in mid and late life. *Cochrane Database Syst Rev* 2018;12:CD011906. doi: 10.1002/14651858.CD011906.pub2.
67. Doets EL, van Wijngaarden JP, Szczecinska A, Dullemeijer C, Souverein OW, Dhonukshe-Rutten RA, Cavelaars AE, van 't Veer P, Brzozowska A, de Groot LC. Vitamin B12 intake and status and cognitive function in elderly people. *Epidemiol Rev* 2013;35:2-21. doi: 10.1093/epirev/mxs003.
68. Goodwill AM, Szoek C. A Systematic Review and Meta-Analysis of The Effect of Low Vitamin D on Cognition. *J Am Geriatr Soc* 2017;65(10):2161-8. doi: 10.1111/jgs.15012.
69. Sydenham E, Dangour AD, Lim WS. Omega 3 fatty acid for the prevention of cognitive decline and dementia. *Cochrane Database Syst Rev* 2012(6):Cd005379. doi: 10.1002/14651858.CD005379.pub3.
70. Zhang Y, Chen J, Qiu J, Li Y, Wang J, Jiao J. Intakes of fish and polyunsaturated fatty acids and mild-to-severe cognitive impairment risks: a dose-response meta-analysis of 21 cohort studies. *Am J Clin Nutr* 2016b;103(2):330-40. doi: 10.3945/ajcn.115.124081.

Supplemental data

71. Tieu J, Shepherd E, Middleton P, Crowther CA. Dietary advice interventions in pregnancy for preventing gestational diabetes mellitus. *Cochrane Database Syst Rev* 2017;1:Cd006674. doi: 10.1002/14651858.CD006674.pub3.
72. Chia AR, Chen LW, Lai JS, Wong CH, Neelakantan N, van Dam RM, Chong MF. Maternal Dietary Patterns and Birth Outcomes: A Systematic Review and Meta-Analysis. *Adv Nutr* 2019;10(4):685-95. doi: 10.1093/advances/nmy123.
73. Mijatovic-Vukas J, Capling L, Cheng S, Stamatakis E, Louie J, Cheung NW, Markovic T, Ross G, Senior A, Brand-Miller JC, et al. Associations of Diet and Physical Activity with Risk for Gestational Diabetes Mellitus: A Systematic Review and Meta-Analysis. *Nutrients* 2018;10(6). doi: 10.3390/nu10060698.
74. Usinger L, Reimer C, Ibsen H. Fermented milk for hypertension. *Cochrane Database Syst Rev* 2012(4):Cd008118. doi: 10.1002/14651858.CD008118.pub2.
75. Soedamah-Muthu SS, Verberne LD, Ding EL, Engberink MF, Geleijnse JM. Dairy consumption and incidence of hypertension: a dose-response meta-analysis of prospective cohort studies. *Hypertension* 2012;60(5):1131-7. doi: 10.1161/hypertensionaha.112.195206.
76. Vinceti M, Filippini T, Del Giovane C, Dennert G, Zwahlen M, Brinkman M, Zeegers MP, Horneber M, D'Amico R, Crespi CM. Selenium for preventing cancer. *Cochrane Database Syst Rev* 2018;1:Cd005195. doi: 10.1002/14651858.CD005195.pub4.
77. Yao Y, Suo T, Andersson R, Cao Y, Wang C, Lu J, Chui E. Dietary fibre for the prevention of recurrent colorectal adenomas and carcinomas. *Cochrane Database Syst Rev* 2017;1:Cd003430. doi: 10.1002/14651858.CD003430.pub2.
78. Aune D, Chan DS, Lau R, Vieira R, Greenwood DC, Kampman E, Norat T. Dietary fibre, whole grains, and risk of colorectal cancer: systematic review and dose-response meta-analysis of prospective studies. *Bmj* 2011;343:d6617. doi: 10.1136/bmj.d6617.
79. Ben Q, Sun Y, Chai R, Qian A, Xu B, Yuan Y. Dietary fiber intake reduces risk for colorectal adenoma: a meta-analysis. *Gastroenterology* 2014;146(3):689-99.e6. doi: 10.1053/j.gastro.2013.11.003.
